# Supplementary material for: Super-enhancer hijacking LINC01977 promotes malignancy of early-stage lung adenocarcinoma addicted to the canonical TGF-β/SMAD3 pathway
Source: PubMed Central journal article supplement (PMC9389757; doi:10.1186/s13045-022-01331-2), 2022-08-18
Supplement: 13045_2022_1331_MOESM2_ESM.pdf [file 13045_2022_1331_MOESM2_ESM.pdf]

**Supplementary Table 1**

| Clinicopathological characteristics of LUAD patients for SE associated lncRNA microarray |            |        |             |             |                           |             |                |         |                |                  |
|------------------------------------------------------------------------------------------|------------|--------|-------------|-------------|---------------------------|-------------|----------------|---------|----------------|------------------|
| Patient                                                                                  | Age (year) | Gender | Tobacco use | Alcohol use | Postoperative Therapies   | Tumor size  | Tumor location | N stage | Clinical stage | Prognosis        |
| #1                                                                                       | 54         | female | No          | No          | No                        | 1.5×1×1cm   | Right; middle  | N2      | IIIA           | N/A              |
| #2                                                                                       | 65         | female | No          | No          | No                        | 3×3×3cm     | Left; lower    | N2      | IIIA           | Brain metastasis |
| #3                                                                                       | 62         | female | No          | No          | Targeted therapy          | 3×3×3cm     | Right; lower   | N2      | IIIA           | Bone metastasis  |
| #4                                                                                       | 66         | female | No          | No          | Radiotherapy+Chemotherapy | 3×3×1cm     | Right; lower   | N2      | IIIA           | Bone metastasis  |
| #5                                                                                       | 61         | female | No          | No          | Radiotherapy+Chemotherapy | 3×1.5×1.5cm | Left; lower    | N2      | IIIA           | Recurrent        |

Supplementary Table 2

| Relationship between <i>LINC01977</i> expression levels and clinicopathological parameters of LUAD |                 |                             |                |              |
|----------------------------------------------------------------------------------------------------|-----------------|-----------------------------|----------------|--------------|
| Variable                                                                                           | No. of patients | <i>LINC01977</i> expression |                | P value      |
|                                                                                                    |                 | High expression             | Low expression |              |
| <b>Age (yr)</b>                                                                                    |                 |                             |                |              |
| > 60                                                                                               | 53              | 36                          | 17             | 0.056        |
| ≤ 60                                                                                               | 45              | 22                          | 23             |              |
| <b>Sex</b>                                                                                         |                 |                             |                |              |
| Female                                                                                             | 43              | 28                          | 15             | 0.291        |
| Male                                                                                               | 55              | 30                          | 25             |              |
| <b>Clinical stage</b>                                                                              |                 |                             |                |              |
| Early (I)                                                                                          | 33              | 21                          | 12             | <b>0.039</b> |
| Advanced (II-IV)                                                                                   | 65              | 27                          | 38             |              |
| <b>pT status</b>                                                                                   |                 |                             |                |              |
| T1-T2                                                                                              | 72              | 42                          | 30             | 0.776        |
| T3-T4                                                                                              | 26              | 16                          | 10             |              |
| <b>Lymph node metastasis</b>                                                                       |                 |                             |                |              |
| No metastasis (N0)                                                                                 | 54              | 29                          | 25             | 0.221        |
| Metastasis (N1-N3)                                                                                 | 44              | 29                          | 15             |              |

Supplementary Table 3

## Band 50-55kDa LC/MS rank TOP100

| Rank | Accession     | Sum PEP Score | Coverage    | Unique peptides | Score Sequest HT |
|------|---------------|---------------|-------------|-----------------|------------------|
| 1    | <u>P84022</u> | 1581.538369   | 95.17647059 | 60              | 4959.066099      |
| 2    | P05787        | 1467.599725   | 94.82401656 | 66              | 4697.421585      |
| 3    | P06733        | 1022.505164   | 91.24423963 | 49              | 4057.320155      |
| 4    | P08729        | 606.6390208   | 85.5010661  | 43              | 1233.621121      |
| 5    | P05783        | 771.4372129   | 84.88372093 | 40              | 896.1322623      |
| 6    | P43686        | 298.5300061   | 83.97129187 | 30              | 310.8965957      |
| 7    | P50395        | 499.7216777   | 81.57303371 | 40              | 482.51165        |
| 8    | P00352        | 976.3556712   | 80.03992016 | 54              | 4410.315665      |
| 9    | Q71U36        | 465.6282355   | 77.38359202 | 1               | 1196.528094      |
| 10   | Q9BQE3        | 422.0409281   | 77.28285078 | 3               | 1319.375438      |
| 11   | Q07960        | 151.0121453   | 75.62642369 | 24              | 135.925935       |
| 12   | P07437        | 700.7892453   | 75.45045045 | 6               | 2199.131603      |
| 13   | P68371        | 675.644767    | 75.28089888 | 2               | 1955.705238      |
| 14   | P06576        | 694.2272743   | 74.48015123 | 29              | 1073.580579      |
| 15   | P04350        | 514.8481644   | 71.84684685 | 4               | 1477.078957      |
| 16   | Q9Y230        | 228.9457727   | 70.84233261 | 32              | 248.3533123      |
| 17   | P43490        | 358.3485188   | 68.83910387 | 40              | 448.7293661      |
| 18   | P26641        | 195.8826669   | 68.42105263 | 31              | 318.9674957      |
| 19   | P68104        | 366.6728514   | 68.18181818 | 16              | 1012.378626      |
| 20   | Q13885        | 612.8343401   | 68.08988764 | 5               | 1779.80046       |
| 21   | Q9BUF5        | 328.5890574   | 67.48878924 | 14              | 913.1560061      |
| 22   | Q13509        | 537.4840734   | 67.33333333 | 11              | 1232.049487      |
| 23   | Q13561        | 120.8725664   | 65.33665835 | 17              | 108.7333139      |
| 24   | P08670        | 145.9376298   | 65.02145923 | 25              | 158.7312125      |
| 25   | P67809        | 270.5204192   | 64.81481481 | 15              | 308.2512472      |
| 26   | P14618        | 410.8626275   | 64.40677966 | 35              | 462.6313863      |
| 27   | P68366        | 405.7176081   | 64.28571429 | 9               | 1042.744968      |
| 28   | P25705        | 409.086521    | 64.01446655 | 38              | 667.2947152      |
| 29   | P50454        | 237.6768535   | 63.87559809 | 24              | 205.6634455      |
| 30   | P11413        | 213.8892378   | 63.49514563 | 32              | 227.0782813      |
| 31   | Q9Y265        | 247.0443594   | 63.37719298 | 28              | 242.6316487      |
| 32   | P17980        | 227.3181357   | 62.87015945 | 25              | 213.5278629      |
| 33   | P00390        | 259.6424879   | 62.83524904 | 21              | 239.7500737      |
| 34   | P34897        | 158.5821594   | 62.5        | 20              | 163.1026411      |
| 35   | Q96KP4        | 209.7828911   | 61.47368421 | 27              | 184.2945125      |
| 36   | P07099        | 283.0689945   | 61.0989011  | 36              | 328.7398981      |
| 37   | P05455        | 298.2244595   | 60.78431373 | 33              | 341.5806321      |
| 38   | O00232        | 175.4943917   | 60.74561404 | 31              | 174.4490408      |
| 39   | P60709        | 133.9092579   | 60.26666667 | 9               | 133.9913621      |
| 40   | Q16851        | 193.1511364   | 60.03937008 | 27              | 212.5914408      |

|    |        |             |             |    |             |
|----|--------|-------------|-------------|----|-------------|
| 41 | P07237 | 167.9285824 | 59.64566929 | 30 | 141.3539716 |
| 42 | P31943 | 255.3024444 | 58.12917595 | 11 | 394.2249269 |
| 43 | P29401 | 397.350523  | 58.105939   | 33 | 488.8759105 |
| 44 | P0DPH8 | 403.8282418 | 58          | 1  | 899.1663804 |
| 45 | O14745 | 229.2535312 | 57.54189944 | 17 | 182.6606115 |
| 46 | P05091 | 246.5583595 | 57.05996132 | 28 | 587.6586207 |
| 47 | P51648 | 164.2247418 | 56.90721649 | 25 | 195.5416422 |
| 48 | P61158 | 135.3239151 | 55.98086124 | 20 | 142.0798564 |
| 49 | Q9HDC9 | 192.6886156 | 55.76923077 | 20 | 205.2852856 |
| 50 | Q16401 | 141.4431492 | 55.75396825 | 19 | 115.6625829 |
| 51 | Q16658 | 107.8498187 | 54.96957404 | 20 | 105.1846702 |
| 52 | P35998 | 157.0643385 | 54.27251732 | 23 | 177.7481421 |
| 53 | P28838 | 118.2976828 | 54.14258189 | 23 | 114.5122209 |
| 54 | P30838 | 229.1924475 | 53.86313466 | 28 | 427.0858424 |
| 55 | P38919 | 155.7968916 | 53.77128954 | 22 | 161.5511703 |
| 56 | P36578 | 263.9550258 | 53.62997658 | 31 | 332.1872935 |
| 57 | P26196 | 141.305102  | 53.00207039 | 18 | 115.6942887 |
| 58 | P52209 | 313.5134955 | 52.58799172 | 29 | 462.5774032 |
| 59 | P22570 | 121.9887003 | 52.54582485 | 21 | 117.7349184 |
| 60 | P09104 | 107.1313298 | 52.07373272 | 11 | 183.706032  |
| 61 | P39656 | 128.9165862 | 51.97368421 | 13 | 134.9735388 |
| 62 | Q15084 | 227.4570122 | 51.36363636 | 22 | 264.0062671 |
| 63 | P48637 | 122.5985433 | 51.05485232 | 22 | 129.4728945 |
| 64 | P49419 | 120.0953226 | 50.83487941 | 21 | 113.1074994 |
| 65 | P26599 | 140.0634251 | 50.65913371 | 15 | 132.7507082 |
| 66 | P52597 | 133.6086641 | 49.87951807 | 13 | 179.826232  |
| 67 | P30101 | 156.0647737 | 49.5049505  | 21 | 168.5456184 |
| 68 | P61011 | 122.008846  | 49.4047619  | 22 | 115.2772222 |
| 69 | O00303 | 98.59998454 | 49.29971989 | 12 | 99.94163728 |
| 70 | O43852 | 68.34183326 | 49.20634921 | 12 | 69.21605921 |
| 71 | Q05639 | 185.1140958 | 49.02807775 | 7  | 621.6798221 |
| 72 | Q16181 | 221.5184502 | 48.51258581 | 24 | 192.4682437 |
| 73 | P00367 | 238.6284628 | 48.38709677 | 10 | 260.6780126 |
| 74 | Q9NP81 | 121.3947004 | 48.06949807 | 19 | 107.2598009 |
| 75 | P14868 | 124.6744556 | 47.50499002 | 20 | 107.4988172 |
| 76 | P06744 | 143.8662924 | 47.49103943 | 18 | 135.6718684 |
| 77 | Q9BY77 | 68.16267214 | 47.26840855 | 16 | 69.08964586 |
| 78 | P78371 | 84.10965482 | 47.10280374 | 19 | 73.56762373 |
| 79 | P63151 | 102.3007249 | 46.30872483 | 12 | 91.21495628 |
| 80 | Q9UNH7 | 90.04749135 | 46.30541872 | 16 | 70.56385732 |
| 81 | Q8NBS9 | 79.90121087 | 46.2962963  | 15 | 72.10716057 |
| 82 | P16989 | 111.6714183 | 46.23655914 | 7  | 112.079877  |
| 83 | Q16719 | 117.645636  | 46.02150538 | 14 | 104.4194913 |
| 84 | P30837 | 188.5006967 | 45.84139265 | 21 | 311.6115426 |

|     |        |             |             |    |             |
|-----|--------|-------------|-------------|----|-------------|
| 85  | P12081 | 114.1357245 | 45.77603143 | 15 | 104.0805347 |
| 86  | Q16543 | 126.0619245 | 45.23809524 | 19 | 99.02100313 |
| 87  | P55795 | 129.3096152 | 44.98886414 | 7  | 203.2322404 |
| 88  | P61201 | 78.56425251 | 44.69525959 | 18 | 72.91095686 |
| 89  | P20042 | 91.33526609 | 44.14414414 | 18 | 77.35656643 |
| 90  | O60701 | 108.9941424 | 44.12955466 | 19 | 102.2766018 |
| 91  | Q96CS3 | 84.17457461 | 44.04494382 | 16 | 73.67514265 |
| 92  | P41091 | 142.7559189 | 43.43220339 | 18 | 138.9869863 |
| 93  | Q16555 | 105.1121487 | 42.83216783 | 15 | 92.10396981 |
| 94  | Q86U42 | 43.5729608  | 42.81045752 | 7  | 39.725945   |
| 95  | Q12849 | 80.34523384 | 42.70833333 | 11 | 67.71130705 |
| 96  | P55036 | 94.34220477 | 42.70557029 | 12 | 96.68012142 |
| 97  | P30566 | 120.1280722 | 42.3553719  | 15 | 115.1415908 |
| 98  | Q9NVA2 | 71.89638486 | 41.95804196 | 8  | 63.50963116 |
| 99  | P31153 | 105.0859204 | 41.7721519  | 18 | 131.3928148 |
| 100 | P23381 | 55.47472531 | 41.61358811 | 13 | 47.27001011 |

---

Band >180kDa LC/MS rank TOP100

| Rank | Accession     | Sum PEP Score | Coverage    | Unique peptides | Score Sequest HT |
|------|---------------|---------------|-------------|-----------------|------------------|
| 1    | <u>Q92793</u> | 1803.856985   | 60.49140049 | 291             | 1812.831102      |
| 2    | Q15149        | 1758.483976   | 62.10503843 | 288             | 1639.385664      |
| 3    | Q14204        | 1709.319109   | 55.31640121 | 240             | 1617.377473      |
| 4    | Q09666        | 1641.43132    | 73.03904924 | 260             | 1376.559812      |
| 5    | O75369        | 961.3061178   | 64.14296695 | 115             | 898.7437736      |
| 6    | Q13813        | 946.972705    | 60.67961165 | 133             | 790.1794667      |
| 7    | P78527        | 945.9886118   | 43.33817829 | 173             | 919.1473345      |
| 8    | P21333        | 929.2240149   | 57.83906309 | 111             | 905.261104       |
| 9    | Q00610        | 855.6265952   | 53.97014925 | 64              | 916.5940317      |
| 10   | Q01082        | 839.1267628   | 55.24534687 | 114             | 657.6525495      |
| 11   | P46821        | 749.4049395   | 46.636953   | 78              | 627.3870324      |
| 12   | P14618        | 617.6134858   | 73.06967985 | 41              | 1221.2778        |
| 13   | P49327        | 611.4623591   | 45.16129032 | 85              | 560.3857783      |
| 14   | P68104        | 519.548195    | 66.45021645 | 16              | 1700.154776      |
| 15   | O75643        | 491.536421    | 43.58614232 | 79              | 424.2212335      |
| 16   | Q63HN8        | 451.6718237   | 24.65911273 | 103             | 379.8824241      |
| 17   | Q7Z6Z7        | 444.6999196   | 31.48148148 | 89              | 396.4861609      |
| 18   | Q5T4S7        | 433.4121175   | 21.76345746 | 74              | 330.3679854      |
| 19   | P27708        | 424.1689803   | 43.37078652 | 66              | 375.6921833      |
| 20   | P16615        | 419.9469428   | 42.61036468 | 46              | 445.7852045      |
| 21   | P35579        | 398.8981198   | 42.19387755 | 60              | 287.49968        |
| 22   | P12270        | 384.5969754   | 38.46804909 | 69              | 305.5215521      |
| 23   | Q9UPN3        | 384.4338541   | 17.74499188 | 89              | 300.2841051      |
| 24   | P33527        | 382.0963012   | 43.82756368 | 52              | 335.9909056      |
| 25   | P29401        | 363.7877843   | 59.87158909 | 31              | 515.9851829      |
| 26   | Q08211        | 355.5013404   | 46.69291339 | 55              | 347.4090531      |
| 27   | Q8IVF2        | 351.5707354   | 37.03192407 | 76              | 276.8472172      |
| 28   | Q13085        | 342.951355    | 36.53026428 | 64              | 291.0387753      |
| 29   | Q6P2Q9        | 338.5325621   | 36.40256959 | 68              | 264.9832737      |
| 30   | P04264        | 329.2455713   | 57.91925466 | 34              | 285.8656027      |
| 31   | Q709C8        | 320.5093516   | 28.16413536 | 76              | 253.4285573      |
| 32   | P04844        | 298.1986369   | 46.27575277 | 25              | 276.9590974      |
| 33   | P39023        | 296.7105826   | 58.06451613 | 28              | 285.3654655      |
| 34   | Q9Y490        | 294.9980488   | 31.44431326 | 48              | 200.4540907      |
| 35   | P20020        | 292.9605376   | 32.70491803 | 21              | 270.1534002      |
| 36   | P53621        | 291.6058824   | 54.82026144 | 53              | 257.0299079      |
| 37   | P13645        | 278.3914675   | 58.04794521 | 25              | 238.8555722      |
| 38   | P05023        | 274.9791681   | 42.71749756 | 27              | 235.2273804      |
| 39   | P02751        | 269.995107    | 28.58340319 | 42              | 224.844698       |
| 40   | Q9Y5B9        | 269.7178979   | 43.07545368 | 41              | 247.6863607      |
| 41   | Q14789        | 262.7641224   | 29.30346732 | 66              | 229.7035779      |

|    |        |             |             |    |             |
|----|--------|-------------|-------------|----|-------------|
| 42 | Q15393 | 254.4714414 | 38.29087921 | 39 | 254.3007993 |
| 43 | P46940 | 253.5309009 | 38.8050694  | 49 | 205.2569982 |
| 44 | P49792 | 241.0372113 | 25.46526055 | 44 | 195.0334867 |
| 45 | Q05639 | 240.225189  | 61.77105832 | 9  | 848.1393415 |
| 46 | Q92616 | 235.4920469 | 25.53350805 | 51 | 185.7995476 |
| 47 | Q16719 | 221.3494651 | 58.70967742 | 19 | 261.9317133 |
| 48 | Q9HC35 | 208.7915805 | 46.78899083 | 39 | 180.9755973 |
| 49 | P00352 | 208.5533743 | 61.67664671 | 25 | 251.0773394 |
| 50 | Q16531 | 192.5504976 | 35.1754386  | 35 | 163.8218123 |
| 51 | P35606 | 188.1612872 | 45.14348786 | 33 | 164.8376588 |
| 52 | P55011 | 187.8240031 | 28.71287129 | 27 | 162.4606856 |
| 53 | O15439 | 186.4102177 | 30.64150943 | 31 | 126.1083587 |
| 54 | P06748 | 186.1273361 | 39.79591837 | 13 | 175.9117537 |
| 55 | P17987 | 175.6646584 | 58.09352518 | 22 | 154.749806  |
| 56 | Q01813 | 174.3137255 | 42.98469388 | 28 | 148.3747308 |
| 57 | P04406 | 170.1325714 | 70.44776119 | 19 | 165.8533708 |
| 58 | P46777 | 170.1123837 | 64.30976431 | 24 | 208.4349533 |
| 59 | P46939 | 168.323027  | 17.06961841 | 39 | 129.9866006 |
| 60 | Q8TEM1 | 166.3293766 | 22.36354001 | 31 | 148.9230709 |
| 61 | P12236 | 164.8074991 | 60.40268456 | 4  | 265.0807129 |
| 62 | P08238 | 163.9660311 | 37.01657459 | 13 | 130.8950449 |
| 63 | P35908 | 163.10335   | 50.23474178 | 22 | 158.6334952 |
| 64 | Q8N766 | 162.3398586 | 30.51359517 | 25 | 142.2479825 |
| 65 | O95573 | 161.1624922 | 45.97222222 | 23 | 124.8825266 |
| 66 | P35527 | 160.1516534 | 44.14125201 | 19 | 144.7794143 |
| 67 | P11413 | 157.0714877 | 52.42718447 | 26 | 159.6546441 |
| 68 | Q16881 | 156.9974777 | 35.43913713 | 18 | 111.4449326 |
| 69 | Q14839 | 156.5011974 | 27.61506276 | 29 | 141.7653925 |
| 70 | P53675 | 153.0253025 | 11.15853659 | 1  | 166.4952459 |
| 71 | Q14914 | 152.8980084 | 72.6443769  | 21 | 145.8187681 |
| 72 | Q5JPE7 | 150.3729567 | 34.17521705 | 1  | 111.4677333 |
| 73 | Q14690 | 149.1937778 | 22.7151256  | 34 | 127.925053  |
| 74 | Q15155 | 148.0211232 | 35.02454992 | 1  | 109.3912809 |
| 75 | Q92887 | 144.732706  | 25.63106796 | 28 | 126.2644082 |
| 76 | Q9UQ35 | 144.7184182 | 12.71802326 | 23 | 126.1715105 |
| 77 | P05141 | 143.6968699 | 55.03355705 | 7  | 247.848453  |
| 78 | O14975 | 142.0421688 | 42.25806452 | 22 | 121.6202908 |
| 79 | O15438 | 140.7521216 | 19.05697446 | 21 | 106.3919255 |
| 80 | P60842 | 140.7368077 | 51.97044335 | 16 | 126.624578  |
| 81 | P23634 | 140.5954545 | 14.74617244 | 2  | 133.1459945 |
| 82 | Q8WXH0 | 136.934572  | 8.104575163 | 42 | 108.5068802 |
| 83 | O75083 | 135.8228682 | 49.5049505  | 23 | 117.1415695 |
| 84 | O60271 | 129.7328041 | 28.91748675 | 29 | 115.0455855 |
| 85 | P15924 | 128.933626  | 15.98746082 | 35 | 117.8888229 |

|     |        |             |             |    |             |
|-----|--------|-------------|-------------|----|-------------|
| 86  | P33992 | 127.9052756 | 41.55313351 | 22 | 106.8069786 |
| 87  | P12235 | 127.4048642 | 46.97986577 | 2  | 205.7315415 |
| 88  | P23141 | 126.8138527 | 46.91358025 | 20 | 108.6303782 |
| 89  | Q9NR30 | 126.7913906 | 40.74074074 | 25 | 114.4817839 |
| 90  | Q9NR09 | 126.3635232 | 10.62384188 | 34 | 93.89195669 |
| 91  | Q93008 | 125.5239456 | 16.22568093 | 36 | 94.49911678 |
| 92  | P26038 | 124.7426353 | 53.72616984 | 32 | 105.6293902 |
| 93  | Q99460 | 122.6980175 | 32.84365163 | 25 | 96.68458593 |
| 94  | Q9NQC3 | 122.0192493 | 13.75838926 | 10 | 122.6737167 |
| 95  | P17858 | 119.1084712 | 29.74358974 | 15 | 94.02234197 |
| 96  | P14868 | 118.6864876 | 49.7005988  | 24 | 112.5047536 |
| 97  | Q14764 | 118.0773501 | 33.03471445 | 20 | 89.71740127 |
| 98  | P69905 | 117.9239084 | 64.08450704 | 8  | 197.5144657 |
| 99  | Q02952 | 116.5288145 | 22.671156   | 22 | 81.14891481 |
| 100 | P07900 | 113.8727792 | 31.83060109 | 11 | 100.9044868 |

---



**Supplementary Table 4**

**RNA-seq differentially genes (LINC01977 vs pcDNA3.1)**

| <b>Symbol</b> | <b>Ensembl</b>  | <b>logFC</b> | <b>P value</b> |
|---------------|-----------------|--------------|----------------|
| LINC01977     | ENSG00000262772 | 13.6774669   | 0              |
| MUC5B         | ENSG00000117983 | -4.43109164  | 3.411E-236     |
| HNRNPH2       | ENSG00000126945 | 5.60782489   | 5.062E-202     |
| NOTCH3        | ENSG00000074181 | -3.18389945  | 1.077E-152     |
| EGR1          | ENSG00000120738 | 3.65163124   | 1.122E-141     |
| TM4SF20       | ENSG00000168955 | -3.04477998  | 5.99E-131      |
| PDK4          | ENSG00000004799 | -3.17617496  | 1.313E-122     |
| CDH1          | ENSG00000039068 | -2.96953903  | 5.013E-122     |
| MUC5AC        | ENSG00000215182 | -2.49800964  | 2.503E-107     |
| FCGBP         | ENSG00000275395 | -2.60821730  | 4.121E-101     |
| CPS1          | ENSG00000021826 | -2.53058230  | 5.945E-100     |
| FOSL1         | ENSG00000175592 | 2.83177313   | 2.053E-99      |
| TM4SF4        | ENSG00000169903 | -2.57134865  | 4.873E-99      |
| GADD45A       | ENSG00000116717 | 2.91660856   | 4.2225E-98     |
| ALOXE3        | ENSG00000179148 | 4.52348671   | 1.0365E-94     |
| CP            | ENSG00000047457 | -2.48320388  | 1.7324E-93     |
| STC2          | ENSG00000113739 | 2.55708222   | 9.9624E-88     |
| LAMC2         | ENSG00000058085 | 2.47223649   | 1.1252E-85     |
| ASB1          | ENSG00000065802 | 2.75010994   | 1.4017E-81     |
| CPLX2         | ENSG00000145920 | -2.16034712  | 1.6997E-81     |
| CYP24A1       | ENSG00000019186 | -2.12985504  | 8.0333E-79     |
| DDIT3         | ENSG00000175197 | 2.60898445   | 2.4786E-77     |
| NEB           | ENSG00000183091 | -4.06723195  | 1.4139E-75     |
| GPX2          | ENSG00000176153 | -2.29030326  | 2.073E-74      |
| GREM1         | ENSG00000166923 | 3.02373945   | 4.4908E-73     |
| ERBB3         | ENSG00000065361 | -3.20081586  | 5.0304E-71     |
| RHOV          | ENSG00000104140 | -3.62603153  | 8.4655E-71     |
| SAMD11        | ENSG00000187634 | -3.17262489  | 1.157E-69      |
| SESN2         | ENSG00000130766 | 2.37309572   | 8.3989E-68     |
| CFH           | ENSG00000000971 | -2.41668268  | 8.8358E-68     |
| SLC45A4       | ENSG00000022567 | -2.08826382  | 8.1545E-67     |
| JUP           | ENSG00000173801 | -1.96955520  | 2.7916E-64     |
| NTS           | ENSG00000133636 | -2.26566937  | 1.1163E-62     |
| PPP1R15A      | ENSG00000087074 | 2.02826209   | 1.1801E-61     |
| ETS1          | ENSG00000134954 | 2.08924925   | 2.4076E-61     |
| SLC7A7        | ENSG00000155465 | -2.18255772  | 2.419E-61      |
| SLC23A2       | ENSG00000089057 | -1.90776796  | 1.216E-60      |
| SPDEF         | ENSG00000124664 | -3.36025018  | 1.3338E-60     |
| UBE2F-SCLY    | ENSG00000258984 | -7.54379110  | 2.4895E-59     |
| MTUS1         | ENSG00000129422 | -1.85339371  | 4.3372E-57     |
| HSPA5         | ENSG00000044574 | 1.8878731    | 1.1766E-55     |
| CYP1A1        | ENSG00000140465 | 4.29256064   | 1.3526E-55     |
| RPL36A-HNR1   | ENSG00000257529 | -3.90017345  | 1.3808E-55     |
| HSPA6         | ENSG00000173110 | 4.00508562   | 8.8303E-55     |
| SNAP25        | ENSG00000132639 | -2.17755767  | 1.2817E-54     |
| ANXA13        | ENSG00000104537 | -3.23028166  | 5.4767E-54     |
| AL163636.2    | ENSG00000259171 | -4.69542204  | 2.9048E-53     |
| FN1           | ENSG00000115414 | -1.80092942  | 3.9994E-53     |
| ATF3          | ENSG00000162772 | 2.03062987   | 6.8252E-53     |
| TNFRSF12A     | ENSG00000006327 | 1.87646604   | 3.1571E-52     |
| TNS4          | ENSG00000131746 | -1.78361548  | 1.235E-51      |
| C5            | ENSG00000106804 | -2.27105492  | 2.5044E-51     |

|           |                 |             |            |
|-----------|-----------------|-------------|------------|
| ANKRD1    | ENSG00000148677 | 4.01258798  | 3.3748E-51 |
| JUN       | ENSG00000177606 | 1.83896711  | 7.6005E-51 |
| ALDH1A1   | ENSG00000165092 | -1.63273824 | 3.0612E-49 |
| SMOC1     | ENSG00000198732 | -1.94096590 | 1.5142E-48 |
| BCAM      | ENSG00000187244 | -2.60032524 | 1.9071E-48 |
| CELSR2    | ENSG00000143126 | -2.19763285 | 2.7054E-48 |
| TOMM6     | ENSG00000214736 | 3.4035577   | 2.2018E-46 |
| DLX2      | ENSG00000115844 | 4.12570116  | 5.8642E-46 |
| THRA      | ENSG00000126351 | -1.95343949 | 6.8172E-46 |
| KLF6      | ENSG00000067082 | 1.74967663  | 1.9875E-45 |
| DHCR24    | ENSG00000116133 | -1.66621532 | 4.2178E-45 |
| FAM129A   | ENSG00000135842 | 1.98110562  | 5.0732E-45 |
| VCAN      | ENSG00000038427 | -1.80081342 | 7.3043E-45 |
| CLCF1     | ENSG00000175505 | 1.79841786  | 2.6279E-44 |
| SLC12A2   | ENSG00000064651 | -1.74099068 | 3.8445E-44 |
| HK2       | ENSG00000159399 | 3.21074832  | 5.8525E-44 |
| LINC00473 | ENSG00000223414 | -2.15307780 | 1.4726E-43 |
| DOK4      | ENSG00000125170 | -1.86732465 | 1.8852E-43 |
| AEN       | ENSG00000181026 | 1.68347355  | 4.26E-43   |
| MEGF9     | ENSG00000106780 | -1.61944289 | 5.3802E-43 |
| MYORG     | ENSG00000164976 | -1.99620560 | 5.5264E-43 |
| TJP3      | ENSG00000105289 | -3.89793867 | 1.5593E-42 |
| SERTAD1   | ENSG00000197019 | 1.97500077  | 2.4896E-42 |
| MRC2      | ENSG00000011028 | -1.61725878 | 2.6542E-42 |
| FGFR4     | ENSG00000160867 | -1.85584502 | 5.8677E-42 |
| CDC25B    | ENSG00000101224 | -1.54713666 | 6.0207E-42 |
| FRMD6     | ENSG00000139926 | 2.06769046  | 8.09E-42   |
| ZEB1      | ENSG00000148516 | 4.3517946   | 4.14E-43   |
| FGB       | ENSG00000171564 | -3.58619579 | 1.4944E-41 |
| KIAA1551  | ENSG00000174718 | 1.84297599  | 5.2915E-41 |
| ABL2      | ENSG00000143322 | 1.66855268  | 1.0079E-40 |
| TRIML2    | ENSG00000179046 | 1.76544189  | 1.1006E-40 |
| C3        | ENSG00000125730 | -1.61106194 | 6.5838E-40 |
| FILIP1    | ENSG00000118407 | -2.46507164 | 1.2619E-39 |
| ABCG1     | ENSG00000160179 | -2.26006200 | 6.0424E-39 |
| FGA       | ENSG00000171560 | -3.55522154 | 7.2182E-39 |
| KRT80     | ENSG00000167767 | 1.63827035  | 8.8235E-39 |
| TCIM      | ENSG00000176907 | -1.75956477 | 1.0146E-38 |
| HR        | ENSG00000168453 | -1.62932587 | 1.3891E-38 |
| GEM       | ENSG00000164949 | 1.88814759  | 1.657E-38  |
| ANKS4B    | ENSG00000175311 | -3.47818297 | 3.3776E-38 |
| HNF4A     | ENSG00000101076 | -1.94973983 | 1.0992E-37 |
| TBX3      | ENSG00000135111 | 2.0362148   | 1.1735E-37 |
| DKK1      | ENSG00000107984 | -1.55376325 | 2.0136E-37 |
| OAS1      | ENSG00000089127 | -1.81341674 | 2.641E-37  |
| DNAL1     | ENSG00000119661 | 2.43422434  | 5.4325E-37 |
| TNFRSF10D | ENSG00000173530 | 1.62813927  | 1.0912E-36 |
| HGD       | ENSG00000113924 | -2.46124992 | 1.1505E-36 |
| PPIF      | ENSG00000108179 | 1.60834777  | 1.9878E-36 |
| KDM6B     | ENSG00000132510 | 1.59065945  | 2.2488E-36 |
| DUSP8     | ENSG00000184545 | 2.06671995  | 2.5407E-36 |
| PLK2      | ENSG00000145632 | 1.60862466  | 3.164E-36  |
| KIF21B    | ENSG00000116852 | -1.67525262 | 4.065E-36  |
| DNAJB2    | ENSG00000135924 | 1.73830311  | 5.7509E-36 |
| LPIN1     | ENSG00000134324 | 1.65274051  | 6.8519E-36 |
| SEMA4G    | ENSG00000095539 | -2.08928908 | 7.6862E-36 |
| UGT1A7    | ENSG00000244122 | -2.43390417 | 2.0197E-35 |
| TSC22D3   | ENSG00000157514 | 1.92165934  | 3.3466E-35 |

|          |                 |              |            |
|----------|-----------------|--------------|------------|
| RTN4RL2  | ENSG00000186907 | -1.415929270 | 3.362E-35  |
| IL1RL1   | ENSG00000115602 | 5.63819217   | 4.3699E-35 |
| LRP5     | ENSG00000162337 | -1.442951769 | 6.6034E-35 |
| CORO2A   | ENSG00000106789 | -2.367760269 | 9.7993E-35 |
| PPM1D    | ENSG00000170836 | 1.71048699   | 1.3565E-34 |
| MMP15    | ENSG00000102996 | -1.935214496 | 3.3207E-34 |
| IGFBP4   | ENSG00000141753 | -1.346578275 | 7.6945E-34 |
| SPTSSA   | ENSG00000165389 | -1.479839830 | 1.1794E-33 |
| TTYH3    | ENSG00000136295 | -1.454843652 | 1.5199E-33 |
| ADAMTS9  | ENSG00000163638 | -1.780924235 | 1.99E-33   |
| PTPRU    | ENSG00000060656 | -1.757571295 | 2.9798E-33 |
| HEXIM1   | ENSG00000186834 | -1.408490716 | 3.9322E-33 |
| DNAJB9   | ENSG00000128590 | 1.56981225   | 4.4079E-33 |
| CSRNP1   | ENSG00000144655 | 1.53399184   | 4.6926E-33 |
| MYO18A   | ENSG00000196535 | -1.432240220 | 5.0621E-33 |
| OLFML2A  | ENSG00000185585 | -1.899919907 | 1.0478E-32 |
| ZNF274   | ENSG00000171606 | 1.76872905   | 1.1339E-32 |
| DIXDC1   | ENSG00000150764 | -2.516823694 | 1.6239E-32 |
| KIF12    | ENSG00000136883 | -3.340806710 | 1.6703E-32 |
| KLHL21   | ENSG00000162413 | 1.58696916   | 1.9116E-32 |
| CNTN1    | ENSG00000018236 | -1.516799347 | 2.1364E-32 |
| TNFAIP3  | ENSG00000118503 | 1.44311459   | 4.89E-32   |
| RASSF9   | ENSG00000198774 | -2.227052455 | 4.911E-32  |
| CDH17    | ENSG00000079112 | -1.636966815 | 6.3491E-32 |
| SLC40A1  | ENSG00000138449 | -2.193035613 | 1.1223E-31 |
| NAV3     | ENSG00000067798 | 1.72915385   | 1.7154E-31 |
| GTF2IP4  | ENSG00000233369 | -1.430276766 | 1.9889E-31 |
| ALDH5A1  | ENSG00000112294 | -2.629891995 | 2.2739E-31 |
| TMEM37   | ENSG00000171227 | -3.576227997 | 2.7054E-31 |
| SNHG12   | ENSG00000197989 | 1.90068611   | 3.4653E-31 |
| SMAD6    | ENSG00000137834 | -1.528265414 | 3.8649E-31 |
| SELENOS  | ENSG00000131871 | 1.4802873    | 4.1908E-31 |
| SMURF2   | ENSG00000108854 | 1.52063457   | 5.3282E-31 |
| TSC22D2  | ENSG00000196428 | 1.89865368   | 5.9404E-31 |
| KRT18    | ENSG00000111057 | -1.292329707 | 6.721E-31  |
| RNASE4   | ENSG00000258818 | -1.708972454 | 1.0258E-30 |
| PDE3A    | ENSG00000172572 | -2.469375849 | 1.1919E-30 |
| RELB     | ENSG00000104856 | 1.49492124   | 1.5561E-30 |
| FOSB     | ENSG00000125740 | 3.31670172   | 1.8994E-30 |
| PROS1    | ENSG00000184500 | -1.711212769 | 2.2066E-30 |
| RND3     | ENSG00000115963 | 1.57942968   | 2.3504E-30 |
| CD38     | ENSG00000004468 | -1.495745190 | 4.3652E-30 |
| FXYD2    | ENSG00000137731 | -1.317276235 | 4.5784E-30 |
| NTRK3    | ENSG00000140538 | -2.558605924 | 4.7274E-30 |
| EHF      | ENSG00000135373 | -2.173044307 | 4.7967E-30 |
| DTX4     | ENSG00000110042 | -3.014388908 | 4.9221E-30 |
| TNS3     | ENSG00000136205 | -1.291472877 | 5.2775E-30 |
| C11orf68 | ENSG00000175573 | 1.6437674    | 5.4307E-30 |
| PTGES    | ENSG00000148344 | -1.414364413 | 5.4632E-30 |
| PAPSS2   | ENSG00000198682 | -1.476729199 | 6.5549E-30 |
| ZNF554   | ENSG00000172006 | 3.00188857   | 8.5592E-30 |
| PIK3C2B  | ENSG00000133056 | -1.622953940 | 8.781E-30  |
| MARCH4   | ENSG00000144583 | 1.55285275   | 1.0297E-29 |
| FEM1C    | ENSG00000145780 | 1.51984635   | 1.0824E-29 |
| MAFG     | ENSG00000197063 | 1.42563991   | 1.1016E-29 |
| AKR1C1   | ENSG00000187134 | -1.258989097 | 1.3095E-29 |
| HIP1     | ENSG00000127946 | -1.415406304 | 1.4141E-29 |
| PLA2G4A  | ENSG00000116711 | -1.662274697 | 1.6848E-29 |

|            |                 |              |            |
|------------|-----------------|--------------|------------|
| CACNA1D    | ENSG00000157388 | -1.993356849 | 2.3739E-29 |
| PLCH1      | ENSG00000114805 | -2.063346623 | 2.6002E-29 |
| SERPINE1   | ENSG00000106366 | 1.32689268   | 3.0114E-29 |
| IGSF3      | ENSG00000143061 | -1.358245125 | 3.0894E-29 |
| THSD7A     | ENSG00000005108 | -1.532288287 | 4.0215E-29 |
| ELMO1      | ENSG00000155849 | -1.806455244 | 7.7084E-29 |
| RAB3D      | ENSG00000105514 | -1.739098505 | 1.6151E-28 |
| TUBB4A     | ENSG00000104833 | -2.270294744 | 1.639E-28  |
| JMJD1C     | ENSG00000171988 | 1.40029268   | 1.683E-28  |
| ARRB1      | ENSG00000137486 | -2.220355980 | 1.9245E-28 |
| TNS2       | ENSG00000111077 | -1.867510393 | 2.6062E-28 |
| ALDH2      | ENSG00000111275 | -1.298150382 | 2.9294E-28 |
| DHRS2      | ENSG00000100867 | 2.04543548   | 3.0508E-28 |
| MANF       | ENSG00000145050 | 1.4270226    | 3.2109E-28 |
| OAS2       | ENSG00000111335 | -2.100278518 | 3.3023E-28 |
| USH1C      | ENSG00000006611 | -2.743710899 | 3.3756E-28 |
| C10orf91   | ENSG00000180066 | -3.359616107 | 4.7307E-28 |
| ASS1       | ENSG00000130707 | -1.510075487 | 4.7589E-28 |
| GABRE      | ENSG00000102287 | -1.377972294 | 6.7691E-28 |
| ADSSL1     | ENSG00000185100 | -2.625858345 | 1.0882E-27 |
| PDLIM5     | ENSG00000163110 | -1.307774782 | 1.2071E-27 |
| TMSB4X     | ENSG00000205542 | -1.209688526 | 1.2552E-27 |
| PNKD       | ENSG00000127838 | -1.478257345 | 1.3109E-27 |
| ARVCF      | ENSG00000099889 | 2.04559058   | 1.4125E-27 |
| AP5Z1      | ENSG00000242802 | 1.50163642   | 2.5414E-27 |
| AMPD3      | ENSG00000133805 | 2.77671683   | 2.892E-27  |
| AKR1C3     | ENSG00000196139 | -1.199464665 | 4.4596E-27 |
| SLC23A1    | ENSG00000170482 | -1.946646377 | 5.6566E-27 |
| MDM2       | ENSG00000135679 | 1.32043499   | 5.8503E-27 |
| TAF1D      | ENSG00000166012 | 1.36262426   | 9.4888E-27 |
| TSPYL2     | ENSG00000184205 | 1.78013235   | 1.5678E-26 |
| LGR4       | ENSG00000205213 | -1.206030274 | 1.6668E-26 |
| SEMA6B     | ENSG00000167680 | -2.291560666 | 2.134E-26  |
| KCNJ16     | ENSG00000153822 | -3.049835345 | 2.5655E-26 |
| PON3       | ENSG00000105852 | -1.713699805 | 2.6288E-26 |
| ASNS       | ENSG00000070669 | 1.37180199   | 2.6582E-26 |
| ULK1       | ENSG00000177169 | 1.29084345   | 3.2132E-26 |
| AKR1C2     | ENSG00000151632 | -1.170608720 | 4.0973E-26 |
| SLC51B     | ENSG00000186198 | -3.110110094 | 7.1391E-26 |
| AC022613.1 | ENSG00000256802 | -1.639752048 | 8.9772E-26 |
| SMG1P2     | ENSG00000205534 | 1.78630752   | 1.0325E-25 |
| PBX1       | ENSG00000185630 | -1.404327377 | 1.1782E-25 |
| FGFR3      | ENSG00000068078 | -2.451106653 | 1.3235E-25 |
| DDIT4L     | ENSG00000145358 | -2.336444959 | 1.6975E-25 |
| SULT2B1    | ENSG00000088002 | -2.967838632 | 1.9031E-25 |
| MCM6       | ENSG00000076003 | -1.316384167 | 1.9324E-25 |
| ANXA4      | ENSG00000196975 | -1.187418068 | 2.2613E-25 |
| MYOCD      | ENSG00000141052 | -1.738613245 | 2.2695E-25 |
| F5         | ENSG00000198734 | -1.818912102 | 2.4775E-25 |
| RABGGTB    | ENSG00000137955 | 1.35761583   | 2.5202E-25 |
| SLC9A3R2   | ENSG00000065054 | -1.498257487 | 2.7908E-25 |
| EREG       | ENSG00000124882 | 1.22630052   | 2.8848E-25 |
| CYR61      | ENSG00000142871 | 1.44856182   | 2.9786E-25 |
| EVA1C      | ENSG00000166979 | -1.887145599 | 3.1718E-25 |
| DNAH17     | ENSG00000187775 | 1.98507471   | 3.3038E-25 |
| FAM83G     | ENSG00000188522 | 1.28471719   | 3.355E-25  |
| KIAA1147   | ENSG00000257093 | -1.344130890 | 4.039E-25  |
| THAP1      | ENSG00000131931 | 1.60882486   | 5.3213E-25 |

|            |                 |             |            |
|------------|-----------------|-------------|------------|
| SLC44A1    | ENSG00000070214 | -1.21538767 | 5.4355E-25 |
| SLPI       | ENSG00000124107 | -1.82261461 | 6.0653E-25 |
| SOWAHC     | ENSG00000198142 | 1.49206772  | 6.7479E-25 |
| BTG2       | ENSG00000159388 | 1.54092123  | 7.8607E-25 |
| VPS37B     | ENSG00000139722 | 1.39459762  | 9.0248E-25 |
| PTGFRN     | ENSG00000134247 | -1.38114171 | 9.9344E-25 |
| BTBD11     | ENSG00000151136 | -1.51108828 | 1.2548E-24 |
| RASSF1     | ENSG00000068028 | 1.5877057   | 1.402E-24  |
| AC131160.1 | ENSG00000283765 | 8.22684845  | 1.6781E-24 |
| MTHFD2     | ENSG00000065911 | 1.23193658  | 1.9882E-24 |
| FLCN       | ENSG00000154803 | 1.31199275  | 2.4281E-24 |
| HLA-DMB    | ENSG00000242574 | -4.04403541 | 2.4834E-24 |
| E2F2       | ENSG00000007968 | -2.25501973 | 2.5431E-24 |
| RUNX1      | ENSG00000159216 | 1.4027322   | 2.5828E-24 |
| SH3PXD2A   | ENSG00000107957 | -1.50323172 | 2.9609E-24 |
| RDH10      | ENSG00000121039 | -1.32016814 | 4.3965E-24 |
| OCLN       | ENSG00000197822 | 1.36353388  | 4.45E-24   |
| GLP2R      | ENSG00000065325 | -1.49319819 | 5.3902E-24 |
| C6orf48    | ENSG00000204387 | 1.31790928  | 5.5059E-24 |
| NUP210     | ENSG00000132182 | -1.19465115 | 7.1769E-24 |
| NR4A1      | ENSG00000123358 | -1.75499080 | 7.738E-24  |
| CXCL5      | ENSG00000163735 | -1.11615101 | 7.8515E-24 |
| ZC3H12A    | ENSG00000163874 | -1.17304051 | 7.9209E-24 |
| SDK2       | ENSG00000069188 | -2.13400939 | 7.9931E-24 |
| PRAME      | ENSG00000185686 | -1.27141804 | 8.4766E-24 |
| PCSK9      | ENSG00000169174 | -1.34117582 | 1.1809E-23 |
| DAPK1      | ENSG00000196730 | -1.22115628 | 1.2251E-23 |
| FNIP1      | ENSG00000217128 | 1.3163131   | 1.2383E-23 |
| HMGCS1     | ENSG00000112972 | 1.78458496  | 1.2701E-23 |
| STX3       | ENSG00000166900 | 1.54975277  | 1.3708E-23 |
| CA11       | ENSG00000063180 | -2.32106407 | 1.6156E-23 |
| PCNA       | ENSG00000132646 | -1.15231123 | 2.3981E-23 |
| WNT9A      | ENSG00000143816 | 1.94709545  | 2.5227E-23 |
| PTPN6      | ENSG00000111679 | -1.69978519 | 3.0526E-23 |
| CA12       | ENSG00000074410 | -1.09526283 | 5.1293E-23 |
| BICDL1     | ENSG00000135127 | -1.95143578 | 5.2061E-23 |
| LIN7A      | ENSG00000111052 | -1.49367495 | 6.4418E-23 |
| SFN        | ENSG00000175793 | 1.18940601  | 7.3099E-23 |
| ERGIC1     | ENSG00000113719 | -1.15205212 | 9.9436E-23 |
| CTNNAL1    | ENSG00000119326 | 1.27079005  | 1.0192E-22 |
| SYNE1      | ENSG00000131018 | 1.26810327  | 1.0206E-22 |
| GPRIN3     | ENSG00000185477 | -1.14099426 | 1.195E-22  |
| MAPK6      | ENSG00000069956 | 1.18035067  | 1.2043E-22 |
| IQSEC2     | ENSG00000124313 | -1.42950589 | 1.3234E-22 |
| SEC24D     | ENSG00000150961 | 1.28320761  | 1.3882E-22 |
| ZBTB43     | ENSG00000169155 | 1.96321488  | 1.4259E-22 |
| SHROOM3    | ENSG00000138771 | -1.54872681 | 1.5111E-22 |
| MSANTD3    | ENSG00000066697 | 1.26933778  | 1.588E-22  |
| GOLGA4     | ENSG00000144674 | 1.24290201  | 1.6472E-22 |
| ZNF555     | ENSG00000186300 | 2.07209316  | 1.7455E-22 |
| CHAC1      | ENSG00000128965 | 2.32447976  | 1.8101E-22 |
| ZMYM3      | ENSG00000147130 | -1.39699655 | 1.8785E-22 |
| KCNJ6      | ENSG00000157542 | -2.52636077 | 2.1365E-22 |
| RAB37      | ENSG00000172794 | -2.42447721 | 3.1737E-22 |
| NOCT       | ENSG00000151014 | 1.3506802   | 3.4684E-22 |
| RNF145     | ENSG00000145860 | -1.18083324 | 4.1702E-22 |
| PI4K2A     | ENSG00000155252 | 1.30152691  | 4.5219E-22 |
| CIDEC      | ENSG00000187288 | -2.98802194 | 4.9935E-22 |

|            |                 |             |            |
|------------|-----------------|-------------|------------|
| MED10      | ENSG00000133398 | 1.30626347  | 5.4891E-22 |
| IGDCC4     | ENSG00000103742 | 1.59683168  | 6.5337E-22 |
| LY6K       | ENSG00000160886 | 2.76330699  | 7.2168E-22 |
| GRAMD1B    | ENSG00000023171 | -1.25582183 | 8.4103E-22 |
| ZFAS1      | ENSG00000177410 | 1.21014793  | 9.7537E-22 |
| ADNP2      | ENSG00000101544 | 1.24470518  | 9.9864E-22 |
| TFE3       | ENSG00000068323 | 1.18432183  | 1.0052E-21 |
| C11orf86   | ENSG00000173237 | -1.51231034 | 1.0569E-21 |
| TBC1D14    | ENSG00000132405 | -1.15431956 | 1.2133E-21 |
| GAS5       | ENSG00000234741 | 1.20114417  | 1.3087E-21 |
| EPC1       | ENSG00000120616 | 1.36439207  | 1.3272E-21 |
| CLK1       | ENSG00000013441 | 1.27286513  | 1.455E-21  |
| TTC39B     | ENSG00000155158 | -1.49788895 | 1.46E-21   |
| NRG1       | ENSG00000157168 | 1.18356357  | 1.5838E-21 |
| GFPT1      | ENSG00000198380 | 1.13224784  | 1.9261E-21 |
| RSRC2      | ENSG00000111011 | 1.23868291  | 2.6392E-21 |
| C1S        | ENSG00000182326 | -1.18744428 | 2.7941E-21 |
| TPCN1      | ENSG00000186815 | -1.24056571 | 2.8108E-21 |
| NNMT       | ENSG00000166741 | -1.99850039 | 3.4963E-21 |
| PTPRS      | ENSG00000105426 | -1.25115277 | 4.1526E-21 |
| PTK2B      | ENSG00000120899 | -1.25681219 | 4.199E-21  |
| PHLDA1     | ENSG00000139289 | 1.1339068   | 4.2927E-21 |
| ADCY9      | ENSG00000162104 | -1.30075602 | 4.3386E-21 |
| DNM1       | ENSG00000106976 | -1.39740096 | 4.4258E-21 |
| SLC29A4    | ENSG00000164638 | -1.89287290 | 6.3081E-21 |
| CBX5       | ENSG00000094916 | -1.08908915 | 6.42E-21   |
| AL133352.1 | ENSG00000255339 | -2.82053614 | 1.0027E-20 |
| OSER1      | ENSG00000132823 | 1.28528872  | 1.0073E-20 |
| GLS        | ENSG00000115419 | 1.12781717  | 1.0615E-20 |
| S100P      | ENSG00000163993 | -1.34845309 | 1.1235E-20 |
| IFNL3      | ENSG00000197110 | -1.65636233 | 1.1966E-20 |
| CXCL1      | ENSG00000163739 | -1.09003550 | 1.1996E-20 |
| NPY4R      | ENSG00000204174 | -2.05515938 | 1.2097E-20 |
| LRP1       | ENSG00000123384 | -1.13506088 | 1.5148E-20 |
| GALNT4     | ENSG00000257594 | -2.33626573 | 1.5868E-20 |
| FAM83A     | ENSG00000147689 | -2.44499688 | 1.7506E-20 |
| EIF2AK3    | ENSG00000172071 | 1.24771925  | 1.8081E-20 |
| GALM       | ENSG00000143891 | -1.43298630 | 1.8427E-20 |
| NPTX1      | ENSG00000171246 | 1.47277058  | 2.1767E-20 |
| COL4A4     | ENSG00000081052 | -1.43869725 | 2.2285E-20 |
| CAMK2N1    | ENSG00000162545 | -1.30004606 | 2.2584E-20 |
| IFNL2      | ENSG00000183709 | -1.54198488 | 2.5806E-20 |
| TST        | ENSG00000128311 | -1.36093994 | 2.7234E-20 |
| SUCNR1     | ENSG00000198829 | -2.22713022 | 2.8893E-20 |
| CACNA1G    | ENSG00000006283 | -1.66530222 | 3.0393E-20 |
| NEU1       | ENSG00000204386 | 1.31408178  | 4.228E-20  |
| LRIF1      | ENSG00000121931 | 1.27608727  | 4.2528E-20 |
| TNS1       | ENSG00000079308 | -1.56086546 | 4.918E-20  |
| IL6R       | ENSG00000160712 | 1.49145528  | 5.3823E-20 |
| HJURP      | ENSG00000123485 | -1.11156964 | 5.8319E-20 |
| KCTD5      | ENSG00000167977 | 1.25154449  | 6.1089E-20 |
| KIAA1191   | ENSG00000122203 | 1.37364482  | 6.2904E-20 |
| MGST3      | ENSG00000143198 | -1.09713114 | 6.919E-20  |
| P2RY6      | ENSG00000171631 | -2.17317749 | 6.9742E-20 |
| HBEGF      | ENSG00000113070 | 2.0182392   | 8.3605E-20 |
| MYRF       | ENSG00000124920 | -1.42191625 | 8.4804E-20 |
| FLRT3      | ENSG00000125848 | -1.61384351 | 8.7133E-20 |
| SNHG8      | ENSG00000269893 | 1.35881222  | 8.7452E-20 |

|            |                 |             |            |
|------------|-----------------|-------------|------------|
| CXCL8      | ENSG00000169429 | 1.50964861  | 9.2688E-20 |
| CSGALNACT2 | ENSG00000169826 | 1.18640133  | 9.796E-20  |
| CES1       | ENSG00000198848 | -1.60448028 | 1.0476E-19 |
| TUFT1      | ENSG00000143367 | 1.32368076  | 1.0729E-19 |
| SCAF8      | ENSG00000213079 | 1.20361092  | 1.0816E-19 |
| KANK2      | ENSG00000197256 | -1.21965355 | 1.2059E-19 |
| ZNF77      | ENSG00000175691 | 2.1834837   | 1.2219E-19 |
| GPRIN2     | ENSG00000204175 | -1.32375892 | 1.2842E-19 |
| NFKB2      | ENSG00000077150 | 1.08671012  | 1.4492E-19 |
| LAMB1      | ENSG00000091136 | -1.03432000 | 1.6865E-19 |
| ZNRF3      | ENSG00000183579 | -1.30425420 | 1.7033E-19 |
| SRC        | ENSG00000197122 | -1.03388361 | 1.7268E-19 |
| CCDC174    | ENSG00000154781 | 1.39360788  | 1.7835E-19 |
| UPP1       | ENSG00000183696 | 1.1582168   | 2.0571E-19 |
| INHBA      | ENSG00000122641 | 2.86485713  | 2.1575E-19 |
| ATF4       | ENSG00000128272 | 1.07049919  | 2.2128E-19 |
| EGFR       | ENSG00000146648 | 1.05177475  | 2.2938E-19 |
| CEBPG      | ENSG00000153879 | 1.0878999   | 2.3442E-19 |
| MGAM       | ENSG00000257335 | -2.11596630 | 2.383E-19  |
| CREBRF     | ENSG00000164463 | 1.50837209  | 2.6391E-19 |
| CXCL2      | ENSG00000081041 | 1.11247279  | 3.2299E-19 |
| TMEM2      | ENSG00000135048 | -1.03428972 | 3.7037E-19 |
| TGM2       | ENSG00000198959 | -1.00638255 | 4.1806E-19 |
| ZNF654     | ENSG00000175105 | 1.31303938  | 4.3828E-19 |
| C1QTNF6    | ENSG00000133466 | -2.14173537 | 4.4194E-19 |
| UFM1       | ENSG00000120686 | 1.15594861  | 4.6677E-19 |
| YOD1       | ENSG00000180667 | 1.23283308  | 4.8291E-19 |
| SCD5       | ENSG00000145284 | -2.02220350 | 5.1769E-19 |
| LINC01137  | ENSG00000233621 | -1.43403720 | 5.3072E-19 |
| SORL1      | ENSG00000137642 | -1.42731850 | 5.3997E-19 |
| CCND3      | ENSG00000112576 | -1.62636373 | 5.601E-19  |
| P3H4       | ENSG00000141696 | -1.29217369 | 5.6773E-19 |
| TIMP2      | ENSG00000035862 | -1.03685155 | 7.3887E-19 |
| HSPG2      | ENSG00000142798 | -1.02074834 | 7.4468E-19 |
| LRP6       | ENSG00000070018 | -1.04892657 | 7.4557E-19 |
| PC         | ENSG00000173599 | -1.16812582 | 7.8E-19    |
| AL645608.1 | ENSG00000223764 | -3.36955431 | 8.2126E-19 |
| BCHE       | ENSG00000114200 | -1.42649089 | 8.827E-19  |
| PLD5       | ENSG00000180287 | -1.70337909 | 1.1814E-18 |
| HSPB8      | ENSG00000152137 | 1.36239502  | 1.2028E-18 |
| SIRPA      | ENSG00000198053 | -1.10518937 | 1.2549E-18 |
| HSP90B1    | ENSG00000166598 | 1.02317914  | 1.2882E-18 |
| CYP51A1    | ENSG00000001630 | 1.08682822  | 1.4512E-18 |
| EEA1       | ENSG00000102189 | 1.24263937  | 1.4576E-18 |
| TNFRSF10B  | ENSG00000120889 | 1.03713341  | 1.487E-18  |
| FAM84B     | ENSG00000168672 | -1.28412623 | 1.4888E-18 |
| PLEK2      | ENSG00000100558 | 1.6230143   | 1.5693E-18 |
| PPFIBP2    | ENSG00000166387 | -1.49820317 | 1.5843E-18 |
| DYRK1B     | ENSG00000105204 | 1.2247644   | 1.6245E-18 |
| CDON       | ENSG00000064309 | -1.80756759 | 1.7499E-18 |
| PLCXD1     | ENSG00000182378 | -1.27036080 | 1.7561E-18 |
| DNAJC22    | ENSG00000178401 | -1.41329773 | 1.8674E-18 |
| PVT1       | ENSG00000249859 | 1.23389354  | 1.9199E-18 |
| GABPB1     | ENSG00000104064 | 1.26649328  | 2.0027E-18 |
| LHPP       | ENSG00000107902 | -1.94408364 | 2.1087E-18 |
| GARS       | ENSG00000106105 | 1.05920317  | 2.3014E-18 |
| PLSCR4     | ENSG00000114698 | -1.89704330 | 2.4763E-18 |
| ACSF2      | ENSG00000167107 | -1.89713682 | 2.5309E-18 |

|            |                 |              |            |
|------------|-----------------|--------------|------------|
| EPS8L3     | ENSG00000198758 | -2.398849163 | 2.6007E-18 |
| CASTOR3    | ENSG00000239521 | -1.554676877 | 2.7083E-18 |
| APLP1      | ENSG00000105290 | -1.183773260 | 2.9074E-18 |
| RALGAPA2   | ENSG00000188559 | -1.421761848 | 3.0131E-18 |
| SOCS3      | ENSG00000184557 | 1.129331463  | 3.0236E-18 |
| LANCL1     | ENSG00000115365 | -1.054912762 | 3.1597E-18 |
| TLK2       | ENSG00000146872 | 1.138839593  | 3.3626E-18 |
| GGT4P      | ENSG00000280208 | 1.403079993  | 3.9043E-18 |
| HNF1B      | ENSG00000275410 | -1.301485844 | 4.0326E-18 |
| FLOT2      | ENSG00000132589 | -1.043677065 | 4.5798E-18 |
| PTP4A3     | ENSG00000184489 | -1.757445324 | 4.7242E-18 |
| PALM       | ENSG00000099864 | -1.760405235 | 5.1988E-18 |
| LRP4       | ENSG00000134569 | -1.660337678 | 5.2846E-18 |
| CYB5A      | ENSG00000166347 | -1.392494616 | 5.3806E-18 |
| RNF6       | ENSG00000127870 | 1.116629123  | 5.5154E-18 |
| ABTB2      | ENSG00000166016 | 1.090553993  | 5.8452E-18 |
| SBDS       | ENSG00000126524 | 1.094032063  | 6.2165E-18 |
| ACSM3      | ENSG00000005187 | -1.979491937 | 6.4538E-18 |
| METTL7B    | ENSG00000170439 | -2.118061627 | 7.6376E-18 |
| SLC44A2    | ENSG00000129353 | -1.721250952 | 7.8578E-18 |
| SIK1       | ENSG00000142178 | -1.026401685 | 9.2097E-18 |
| AP003119.3 | ENSG00000261578 | -1.473499495 | 9.6112E-18 |
| NEDD4      | ENSG00000069869 | 1.016289843  | 9.6498E-18 |
| LZTS2      | ENSG00000107816 | -1.185599014 | 9.7061E-18 |
| ZNF79      | ENSG00000196152 | 1.602851083  | 9.8778E-18 |
| PON2       | ENSG00000105854 | -1.000516445 | 9.9598E-18 |
| LRFN1      | ENSG00000128011 | -1.330353687 | 9.9824E-18 |
| SCP2       | ENSG00000116171 | -1.152830196 | 1E-17      |
| PIK3AP1    | ENSG00000155629 | -1.753973925 | 1.0219E-17 |
| SPC24      | ENSG00000161888 | -1.737858726 | 1.0593E-17 |
| ARC        | ENSG00000198576 | 3.540534783  | 1.1369E-17 |
| GLI1       | ENSG00000111087 | -1.651463507 | 1.223E-17  |
| MSRB1      | ENSG00000198736 | -1.282992885 | 1.2309E-17 |
| SDF2L1     | ENSG00000128228 | 1.144946033  | 1.349E-17  |
| HSPA13     | ENSG00000155304 | 1.066703983  | 1.3611E-17 |
| NOL4L      | ENSG00000197183 | -1.366185254 | 1.4826E-17 |
| EIF1       | ENSG00000173812 | 1.003512393  | 1.5037E-17 |
| GPR20      | ENSG00000204882 | -3.259451045 | 1.5759E-17 |
| GAL3ST1    | ENSG00000128242 | -1.481790200 | 1.7847E-17 |
| AKAP17A    | ENSG00000197976 | 1.107871233  | 1.881E-17  |
| UCP2       | ENSG00000175567 | -1.239930605 | 2.1684E-17 |
| ABCA2      | ENSG00000107331 | -1.083560738 | 2.2149E-17 |
| SGSM2      | ENSG00000141258 | -1.201520023 | 2.2637E-17 |
| ZNF574     | ENSG00000105732 | 1.117967133  | 2.4363E-17 |
| STK40      | ENSG00000196182 | 1.314566063  | 2.8092E-17 |
| AC073869.1 | ENSG00000152117 | 1.239214433  | 2.8442E-17 |
| EPC2       | ENSG00000135999 | 1.264466853  | 3.4529E-17 |
| SGK1       | ENSG00000118515 | -1.545293415 | 3.5543E-17 |
| MSMO1      | ENSG00000052802 | 1.101343233  | 3.681E-17  |
| NFIL3      | ENSG00000165030 | 1.138424693  | 3.7187E-17 |
| SH3RF1     | ENSG00000154447 | 1.116206363  | 3.8988E-17 |
| HIST2H3C   | ENSG00000203811 | 2.282630813  | 4.0191E-17 |
| FAM13B     | ENSG00000031003 | 1.193450613  | 4.1531E-17 |
| ZSWIM4     | ENSG00000132003 | 1.237722333  | 4.2048E-17 |
| FOXRED2    | ENSG00000100350 | -1.239344073 | 4.3215E-17 |
| S1PR3      | ENSG00000213694 | -1.089150043 | 5.029E-17  |
| LINC02582  | ENSG00000261780 | -1.018029176 | 5.2925E-17 |
| ZMYND8     | ENSG00000101040 | -1.111344694 | 5.5724E-17 |



|            |                 |              |            |
|------------|-----------------|--------------|------------|
| BRD2       | ENSG00000204256 | 1.0505219    | 6.1353E-17 |
| FMN1       | ENSG00000248905 | -1.186071197 | 6.3007E-17 |
| PAX7       | ENSG00000009709 | -1.291999253 | 6.6158E-17 |
| GATA6      | ENSG00000141448 | 1.64392494   | 7.3237E-17 |
| SLC22A18   | ENSG00000110628 | -1.210602774 | 7.4944E-17 |
| AC007325.2 | ENSG00000277196 | -3.487676723 | 7.6405E-17 |
| SMG1P1     | ENSG00000237296 | 1.13899692   | 7.9479E-17 |
| SLC39A8    | ENSG00000138821 | -1.040751320 | 7.9836E-17 |
| PCF11      | ENSG00000165494 | 1.07992229   | 8.2833E-17 |
| TNFRSF9    | ENSG00000049249 | 1.53128929   | 8.3824E-17 |
| TRAF1      | ENSG00000056558 | 1.18659287   | 9.1739E-17 |
| KLF7       | ENSG00000118263 | 1.06591139   | 9.4193E-17 |
| API5       | ENSG00000166181 | 1.04337161   | 9.8013E-17 |
| LURAP1L    | ENSG00000153714 | 1.12587018   | 1.0006E-16 |
| BCYRN1     | ENSG00000236824 | 1.84581031   | 1.0031E-16 |
| SCARA3     | ENSG00000168077 | -1.164576635 | 1.0379E-16 |
| GOLGB1     | ENSG00000173230 | 1.02238823   | 1.1368E-16 |
| TMEM92     | ENSG00000167105 | -1.672224794 | 1.138E-16  |
| ETS2       | ENSG00000157557 | 1.03448345   | 1.1768E-16 |
| AC004656.1 | ENSG00000260822 | -1.542569085 | 1.1853E-16 |
| ADD3       | ENSG00000148700 | -2.051568097 | 1.206E-16  |
| CTSF       | ENSG00000174080 | -1.494676750 | 1.2925E-16 |
| SUCO       | ENSG00000094975 | 1.14885756   | 1.3395E-16 |
| CGN        | ENSG00000143375 | -1.858946507 | 1.5773E-16 |
| SOX9       | ENSG00000125398 | -1.193580987 | 1.6613E-16 |
| AC106886.5 | ENSG00000282034 | 1.57562217   | 1.7217E-16 |
| ING3       | ENSG00000071243 | 1.588464     | 1.8542E-16 |
| DNAJB11    | ENSG00000090520 | 1.02468035   | 1.9217E-16 |
| F2R        | ENSG00000181104 | -1.057754480 | 1.9625E-16 |
| SUSD2      | ENSG00000099994 | -1.664008745 | 1.9747E-16 |
| SYNGR1     | ENSG00000100321 | -1.928281765 | 2.1786E-16 |
| MBD1       | ENSG00000141644 | 1.17627156   | 2.2356E-16 |
| BCL10      | ENSG00000142867 | 1.18258953   | 2.3117E-16 |
| CRY1       | ENSG00000008405 | 1.14765966   | 2.5834E-16 |
| TC2N       | ENSG00000165929 | -1.925210260 | 2.722E-16  |
| SDHAP1     | ENSG00000185485 | 1.26317304   | 2.8672E-16 |
| GTF2IP1    | ENSG00000277053 | -1.022309946 | 2.9256E-16 |
| MINPP1     | ENSG00000107789 | -1.104077456 | 3.2405E-16 |
| LINC00973  | ENSG00000240476 | 1.81151026   | 3.5219E-16 |
| GABPB1-AS1 | ENSG00000244879 | -1.096076097 | 4.0068E-16 |
| SENP3      | ENSG00000161956 | -1.039932527 | 4.0153E-16 |
| FICD       | ENSG00000198855 | 1.21833184   | 4.1068E-16 |
| OXTR       | ENSG00000180914 | 1.41013667   | 4.2366E-16 |
| HHIPL2     | ENSG00000143512 | -1.156693204 | 4.6373E-16 |
| TNC        | ENSG00000041982 | 1.85526669   | 4.7084E-16 |
| DNAJC25    | ENSG00000059769 | 1.27880767   | 4.8578E-16 |
| CACNA1H    | ENSG00000196557 | -1.823553156 | 4.8764E-16 |
| TICAM1     | ENSG00000127666 | 1.24016886   | 5.6906E-16 |
| SMIM14     | ENSG00000163683 | -1.072300413 | 5.9014E-16 |
| ASB13      | ENSG00000196372 | -1.310019336 | 6.4861E-16 |
| PDK2       | ENSG00000005882 | -1.672314705 | 6.9431E-16 |
| ABCD3      | ENSG00000117528 | -1.017561229 | 7.0374E-16 |
| VAV3       | ENSG00000134215 | -1.470849377 | 7.6854E-16 |
| MCM5       | ENSG00000100297 | -1.048882799 | 8.8913E-16 |
| ELOVL3     | ENSG00000119915 | -3.355119827 | 1.0795E-15 |
| RHNO1      | ENSG00000171792 | -1.212341157 | 1.1063E-15 |
| ATP6V0D2   | ENSG00000147614 | 5.20407859   | 1.1099E-15 |
| IGFN1      | ENSG00000163395 | 2.58123675   | 1.1649E-15 |

|            |                 |             |            |
|------------|-----------------|-------------|------------|
| AL365205.1 | ENSG00000124593 | -2.28694417 | 1.1944E-15 |
| PLD1       | ENSG00000075651 | -1.08519273 | 1.2116E-15 |
| ADAMTS10   | ENSG00000142303 | -1.66453826 | 1.7065E-15 |
| F7         | ENSG00000057593 | -3.52739474 | 1.7192E-15 |
| OSGIN1     | ENSG00000140961 | 1.06698474  | 1.9469E-15 |
| LRRC8C     | ENSG00000171488 | 1.1281521   | 2.0114E-15 |
| ZNF134     | ENSG00000213762 | 1.27165649  | 2.1337E-15 |
| ZNF408     | ENSG00000175213 | 1.28883193  | 2.1471E-15 |
| NAV2       | ENSG00000166833 | 1.34537614  | 2.3611E-15 |
| FAM69B     | ENSG00000165716 | -1.29705113 | 2.3992E-15 |
| ZMYM5      | ENSG00000132950 | 1.34874691  | 2.6422E-15 |
| FBXL19-AS1 | ENSG00000260852 | 1.26094682  | 2.9907E-15 |
| SMG1P5     | ENSG00000183604 | 1.33624858  | 3.095E-15  |
| GTPBP2     | ENSG00000172432 | 1.03728863  | 3.4525E-15 |
| ANG        | ENSG00000214274 | -1.67631279 | 3.5821E-15 |
| CARMIL1    | ENSG00000079691 | -1.07737437 | 3.6998E-15 |
| DDX10      | ENSG00000178105 | 1.02752223  | 3.9315E-15 |
| CEP135     | ENSG00000174799 | 1.28887192  | 4.2519E-15 |
| LBP        | ENSG00000129988 | -5.51675531 | 4.3502E-15 |
| NPY4R2     | ENSG00000264717 | -1.84699155 | 4.6148E-15 |
| ARID3B     | ENSG00000179361 | 1.33710747  | 4.7705E-15 |
| B4GAT1     | ENSG00000174684 | -1.27151512 | 4.9505E-15 |
| WHAMM      | ENSG00000156232 | 1.11748221  | 5.1497E-15 |
| TMSB4XP8   | ENSG00000187653 | -1.33460329 | 5.1747E-15 |
| TESC       | ENSG00000088992 | -1.36077042 | 5.5402E-15 |
| ZFYVE1     | ENSG00000165861 | 1.12387699  | 5.6649E-15 |
| RNF19B     | ENSG00000116514 | 1.05803519  | 6.0842E-15 |
| ZNF185     | ENSG00000147394 | 1.46055804  | 6.1516E-15 |
| LZTFL1     | ENSG00000163818 | 1.31135768  | 6.4445E-15 |
| SPHK1      | ENSG00000176170 | 1.23589197  | 7.4757E-15 |
| HMGCR      | ENSG00000113161 | 1.04333348  | 8.214E-15  |
| SNHG1      | ENSG00000255717 | 1.05682398  | 9.1702E-15 |
| NTHL1      | ENSG00000065057 | -1.35865033 | 9.1768E-15 |
| ULBP1      | ENSG00000111981 | 1.89323374  | 1.0588E-14 |
| BMP6       | ENSG00000153162 | -1.13803935 | 1.2578E-14 |
| EFNA5      | ENSG00000184349 | -1.00358728 | 1.2614E-14 |
| HMGA2      | ENSG00000149948 | 1.02996786  | 1.3222E-14 |
| SLC16A3    | ENSG00000141526 | -1.35347565 | 1.3819E-14 |
| CDH4       | ENSG00000179242 | 1.70208321  | 1.3868E-14 |
| CBS        | ENSG00000160200 | 1.3380764   | 1.4502E-14 |
| NR4A2      | ENSG00000153234 | -1.30849029 | 1.4613E-14 |
| ZSCAN12P1  | ENSG00000219891 | 4.42333076  | 1.4838E-14 |
| SELENBP1   | ENSG00000143416 | -3.16788857 | 1.5246E-14 |
| NOSTRIN    | ENSG00000163072 | -1.28524244 | 1.5276E-14 |
| NLGN2      | ENSG00000169992 | -1.21420923 | 1.5788E-14 |
| LYSMD3     | ENSG00000176018 | 1.03005968  | 1.5833E-14 |
| BCAT1      | ENSG00000060982 | 1.27087278  | 1.5849E-14 |
| CCDC9      | ENSG00000105321 | 1.07260807  | 1.5992E-14 |
| TRIP11     | ENSG00000100815 | 1.0038741   | 1.778E-14  |
| N4BP3      | ENSG00000145911 | 1.49051243  | 1.8048E-14 |
| IKZF5      | ENSG00000095574 | 1.13068738  | 1.9114E-14 |
| PPP4R4     | ENSG00000119698 | 2.08747478  | 1.9283E-14 |
| TIPARP     | ENSG00000163659 | 2.62168004  | 1.9574E-14 |
| SEMA7A     | ENSG00000138623 | 2.15851388  | 2.1227E-14 |
| ST3GAL2    | ENSG00000157350 | -1.01550815 | 2.1236E-14 |
| CHIC2      | ENSG00000109220 | 1.47020646  | 2.2838E-14 |
| HCN2       | ENSG00000099822 | -1.24783098 | 2.5198E-14 |
| PIM1       | ENSG00000137193 | 1.02337877  | 2.6728E-14 |

|             |                 |             |            |
|-------------|-----------------|-------------|------------|
| FGL1        | ENSG00000104760 | -1.76681018 | 2.7789E-14 |
| DHRS3       | ENSG00000162496 | -1.65291632 | 2.8134E-14 |
| REV3L       | ENSG00000009413 | 1.00191616  | 2.9338E-14 |
| XYLT2       | ENSG00000015532 | -1.03266565 | 3.0083E-14 |
| TP53INP1    | ENSG00000164938 | 1.22516365  | 3.2438E-14 |
| MYO1A       | ENSG00000166866 | -3.40305378 | 3.3855E-14 |
| HIST2H3A    | ENSG00000203852 | 2.31774016  | 3.4278E-14 |
| UPF3B       | ENSG00000125351 | 1.08793233  | 3.5051E-14 |
| MARCKSL1    | ENSG00000175130 | -1.01948346 | 3.6142E-14 |
| RIMS3       | ENSG00000117016 | -1.74860057 | 3.6302E-14 |
| HSPA14      | ENSG00000284024 | 1.06584438  | 3.772E-14  |
| FAM20C      | ENSG00000177706 | -1.20370614 | 3.9538E-14 |
| ATP8B1      | ENSG00000081923 | -1.13585529 | 4.0526E-14 |
| HHIP        | ENSG00000164161 | -2.42389096 | 4.5102E-14 |
| UGT1A1      | ENSG00000241635 | -3.50527579 | 4.5536E-14 |
| FHOD1       | ENSG00000135723 | -1.08734645 | 4.6414E-14 |
| AC233724.15 | ENSG00000283740 | -3.30262686 | 4.7129E-14 |
| LPCAT3      | ENSG00000111684 | -1.03584509 | 5.1157E-14 |
| PKDCC       | ENSG00000162878 | -1.23122985 | 6.6858E-14 |
| CARHSP1     | ENSG00000153048 | -1.07865549 | 7.4153E-14 |
| ABCC9       | ENSG00000069431 | 2.31957053  | 7.4525E-14 |
| NDRG2       | ENSG00000165795 | -2.71643483 | 7.5151E-14 |
| ZKSCAN5     | ENSG00000196652 | 1.09841998  | 7.5813E-14 |
| TMEM268     | ENSG00000157693 | 1.27838889  | 7.9413E-14 |
| ZNF436      | ENSG00000125945 | 1.14454642  | 8.9545E-14 |
| DAAM1       | ENSG00000100592 | 1.21218535  | 9.0744E-14 |
| MED15       | ENSG00000099917 | 1.00294095  | 9.834E-14  |
| PTHLH       | ENSG00000087494 | 1.7568422   | 9.9985E-14 |
| PMS2CL      | ENSG00000187953 | 1.22287152  | 1.0192E-13 |
| ZNF343      | ENSG00000088876 | 1.21206851  | 1.0871E-13 |
| SYT12       | ENSG00000173227 | -2.33196335 | 1.14E-13   |
| HNMT        | ENSG00000150540 | -2.06498342 | 1.1984E-13 |
| RBM20       | ENSG00000203867 | -1.47521887 | 1.2749E-13 |
| TLE2        | ENSG00000065717 | -2.22355674 | 1.3712E-13 |
| DCLK1       | ENSG00000133083 | 1.77651996  | 1.5392E-13 |
| STAG3       | ENSG00000066923 | -1.69886331 | 1.6384E-13 |
| STARD4      | ENSG00000164211 | 1.20696755  | 1.7339E-13 |
| ST8SIA4     | ENSG00000113532 | -2.04146891 | 1.7994E-13 |
| ADRA2C      | ENSG00000184160 | 1.46448816  | 1.8454E-13 |
| SERPINB8    | ENSG00000166401 | 1.31142317  | 1.8851E-13 |
| ITM2C       | ENSG00000135916 | -1.03969290 | 2.1062E-13 |
| PASK        | ENSG00000115687 | -1.36195587 | 2.1459E-13 |
| CISH        | ENSG00000114737 | -2.99618766 | 2.2428E-13 |
| ENTPD7      | ENSG00000198018 | 1.22728639  | 2.4297E-13 |
| PDE7A       | ENSG00000205268 | -1.06305206 | 2.5745E-13 |
| BRPF1       | ENSG00000156983 | 1.04299932  | 2.5973E-13 |
| BTBD10      | ENSG00000148925 | 1.02415131  | 2.7079E-13 |
| EDA2R       | ENSG00000131080 | 1.02714362  | 2.8923E-13 |
| LARP1B      | ENSG00000138709 | 1.08563443  | 2.9438E-13 |
| ALDH1L2     | ENSG00000136010 | 1.08762889  | 3.1016E-13 |
| LINC00173   | ENSG00000196668 | -Inf        | 3.1115E-13 |
| EXPH5       | ENSG00000110723 | 1.55391101  | 3.1892E-13 |
| AL390719.1  | ENSG00000217801 | 1.80977     | 3.5934E-13 |
| SPC25       | ENSG00000152253 | -1.32071543 | 3.731E-13  |
| BCAS1       | ENSG00000064787 | -2.56940843 | 4.1505E-13 |
| MT-RNR1     | ENSG00000211459 | 1.29346192  | 4.1734E-13 |
| SYT17       | ENSG00000103528 | -1.22973917 | 4.3479E-13 |
| KCTD17      | ENSG00000100379 | -1.20015571 | 4.794E-13  |

|            |                 |              |            |
|------------|-----------------|--------------|------------|
| AC010616.1 | ENSG00000268041 | 4.26972997   | 4.8008E-13 |
| CSNK1G1    | ENSG00000169118 | 1.0309524    | 5.1474E-13 |
| ZNF467     | ENSG00000181444 | -3.287589457 | 5.2951E-13 |
| RRN3P1     | ENSG00000248124 | 1.45406809   | 5.4732E-13 |
| RAB20      | ENSG00000139832 | -2.470633865 | 5.509E-13  |
| AP001972.5 | ENSG00000279117 | -2.079366550 | 5.5627E-13 |
| SP2        | ENSG00000167182 | 1.59506013   | 5.6042E-13 |
| RNA5-8SN4  | ENSG00000275215 | 2.2868757    | 6.1484E-13 |
| MBD6       | ENSG00000166987 | 1.0465171    | 6.1872E-13 |
| PLEKHM1    | ENSG00000225190 | 1.03237876   | 6.7475E-13 |
| DGCR6      | ENSG00000183628 | -1.820314990 | 6.9735E-13 |
| ZSCAN25    | ENSG00000197037 | 1.21020359   | 7.5368E-13 |
| HS3ST1     | ENSG00000002587 | -2.462701680 | 7.8524E-13 |
| SNTB1      | ENSG00000172164 | -1.559368794 | 8.1403E-13 |
| PDRG1      | ENSG00000088356 | 1.06522045   | 8.6755E-13 |
| SERPINI1   | ENSG00000163536 | -2.466116855 | 8.945E-13  |
| HNF1A-AS1  | ENSG00000241388 | -3.183461830 | 9.0813E-13 |
| SLC17A3    | ENSG00000124564 | -2.008198047 | 9.2666E-13 |
| BBC3       | ENSG00000105327 | 1.30016469   | 9.547E-13  |
| MAGEE1     | ENSG00000198934 | -1.842553672 | 1.0197E-12 |
| PCGF1      | ENSG00000115289 | 1.12570665   | 1.0264E-12 |
| PEAR1      | ENSG00000187800 | 2.29304399   | 1.1012E-12 |
| ABHD14B    | ENSG00000114779 | -1.288043267 | 1.1442E-12 |
| GPC6       | ENSG00000183098 | -1.080081709 | 1.1812E-12 |
| FBLN1      | ENSG00000077942 | -1.078529924 | 1.2007E-12 |
| SEMA4D     | ENSG00000187764 | -1.202680006 | 1.2176E-12 |
| CORO2B     | ENSG00000103647 | 3.59267045   | 1.3277E-12 |
| BEX2       | ENSG00000133134 | 1.68053946   | 1.3664E-12 |
| COL6A2     | ENSG00000142173 | 1.13507369   | 1.3955E-12 |
| AQP3       | ENSG00000165272 | -1.541193885 | 1.4431E-12 |
| SPATA2     | ENSG00000158480 | 1.13131291   | 1.4764E-12 |
| EPHX1      | ENSG00000143819 | -1.074978947 | 1.5102E-12 |
| RHPN1      | ENSG00000158106 | -1.418309134 | 1.5355E-12 |
| PLLP       | ENSG00000102934 | -1.460905109 | 1.5494E-12 |
| ZNF777     | ENSG00000196453 | 1.02638231   | 1.5553E-12 |
| GPR37      | ENSG00000170775 | -2.051075660 | 1.5781E-12 |
| PLXND1     | ENSG00000004399 | -1.565759897 | 1.7637E-12 |
| HS6ST1     | ENSG00000136720 | -1.016901280 | 1.7745E-12 |
| PPARGC1B   | ENSG00000155846 | -1.740679070 | 1.7917E-12 |
| SLC6A9     | ENSG00000196517 | 1.22750737   | 1.8163E-12 |
| APOH       | ENSG00000091583 | -1.966044956 | 1.9826E-12 |
| SLC45A1    | ENSG00000162426 | -1.480484449 | 1.9983E-12 |
| CRELD2     | ENSG00000184164 | 1.09631079   | 2.227E-12  |
| CCNL1      | ENSG00000163660 | 1.57536675   | 2.3062E-12 |
| LPCAT4     | ENSG00000176454 | -1.010628157 | 2.3822E-12 |
| LRRK2      | ENSG00000188906 | -1.004275747 | 2.5319E-12 |
| FJX1       | ENSG00000179431 | 1.0118645    | 2.6356E-12 |
| GSDMD      | ENSG00000104518 | -1.182627535 | 2.7359E-12 |
| LYST       | ENSG00000143669 | 1.09013744   | 2.8001E-12 |
| EMP2       | ENSG00000213853 | -1.003502169 | 2.9659E-12 |
| C3orf38    | ENSG00000179021 | 1.04594721   | 3.0423E-12 |
| BCL2L11    | ENSG00000153094 | -1.989944060 | 3.1468E-12 |
| ACACB      | ENSG00000076555 | -1.149078590 | 3.1702E-12 |
| FGG        | ENSG00000171557 | -3.174807185 | 3.3569E-12 |
| NKX3-1     | ENSG00000167034 | 1.30243514   | 3.4394E-12 |
| LRRRC20    | ENSG00000172731 | -1.137772425 | 3.5333E-12 |
| SEC14L4    | ENSG00000133488 | -1.321997246 | 3.636E-12  |
| PDGFRL     | ENSG00000104213 | -1.913877237 | 3.7837E-12 |

|            |                 |              |            |
|------------|-----------------|--------------|------------|
| TBC1D22B   | ENSG00000065491 | 1.11592511   | 3.8764E-12 |
| CTGF       | ENSG00000118523 | 1.26246987   | 3.8833E-12 |
| RBM48      | ENSG00000127993 | 1.21310269   | 3.9847E-12 |
| THAP2      | ENSG00000173451 | 1.58156679   | 4.1244E-12 |
| CROCCP2    | ENSG00000215908 | 1.03565891   | 4.1542E-12 |
| ZNF165     | ENSG00000197279 | 2.76947024   | 4.3476E-12 |
| FOXQ1      | ENSG00000164379 | -1.121076952 | 4.3792E-12 |
| MED26      | ENSG00000105085 | 1.29078167   | 4.4551E-12 |
| SLC27A2    | ENSG00000140284 | -1.466187234 | 4.5986E-12 |
| THEM6      | ENSG00000130193 | -1.047190878 | 4.6571E-12 |
| DAGLB      | ENSG00000164535 | 1.05361014   | 4.6735E-12 |
| AC141586.1 | ENSG00000215154 | 1.38281899   | 4.8198E-12 |
| FBLN5      | ENSG00000140092 | -2.592296890 | 4.9835E-12 |
| ARHGEF26   | ENSG00000114790 | -1.638711527 | 5.4636E-12 |
| HRH2       | ENSG00000113749 | -3.021982949 | 5.7083E-12 |
| SH2B2      | ENSG00000160999 | -2.221603877 | 5.7654E-12 |
| ING1       | ENSG00000153487 | 1.27655864   | 5.8429E-12 |
| NECTIN1    | ENSG00000110400 | -1.254250014 | 5.9907E-12 |
| ZNF329     | ENSG00000181894 | 2.28627764   | 5.9971E-12 |
| ARHGEF39   | ENSG00000137135 | -1.359284263 | 6.1958E-12 |
| CCDC106    | ENSG00000173581 | -1.450208657 | 6.3327E-12 |
| AP000757.2 | ENSG00000254844 | -2.869309548 | 6.6958E-12 |
| FKBP11     | ENSG00000134285 | 1.06232598   | 6.6975E-12 |
| ZNF26      | ENSG00000198393 | 1.2013301    | 7.1562E-12 |
| JAKMIP3    | ENSG00000188385 | -1.078669275 | 7.89E-12   |
| ADM2       | ENSG00000128165 | 1.49414981   | 7.9244E-12 |
| SLITRK5    | ENSG00000165300 | -1.562028727 | 7.9521E-12 |
| CYLD       | ENSG00000083799 | 1.27079906   | 7.9783E-12 |
| DDC        | ENSG00000132437 | -1.160138493 | 1.0702E-11 |
| SMAD7      | ENSG00000101665 | 1.04225259   | 1.0947E-11 |
| SIRT1      | ENSG00000096717 | 1.06101375   | 1.2013E-11 |
| CGB8       | ENSG00000213030 | 3.83302757   | 1.2478E-11 |
| NFKBIB     | ENSG00000104825 | 1.1697578    | 1.2809E-11 |
| CPOX       | ENSG00000080819 | -1.004272438 | 1.3819E-11 |
| ABCA7      | ENSG00000064687 | -1.028580564 | 1.4327E-11 |
| ADGRL1     | ENSG00000072071 | -1.514400652 | 1.4982E-11 |
| CHST1      | ENSG00000175264 | 3.28775535   | 1.6197E-11 |
| RBFOX3     | ENSG00000167281 | -1.992073978 | 1.6327E-11 |
| HILPDA     | ENSG00000135245 | -1.145150505 | 1.7028E-11 |
| TRAF6      | ENSG00000175104 | 1.07482961   | 1.8168E-11 |
| KAT14      | ENSG00000149474 | -1.174660787 | 1.8956E-11 |
| DOCK8      | ENSG00000107099 | -1.737590057 | 1.9077E-11 |
| RHBDD3     | ENSG00000100263 | 1.01112541   | 1.9361E-11 |
| TJAP1      | ENSG00000137221 | 1.00756666   | 1.9997E-11 |
| GAS2L3     | ENSG00000139354 | 1.12470702   | 2.031E-11  |
| PPARGC1A   | ENSG00000109819 | -1.818684473 | 2.1579E-11 |
| UNC93B1    | ENSG00000110057 | -1.202011957 | 2.2113E-11 |
| THAP9-AS1  | ENSG00000251022 | 1.14974586   | 2.38E-11   |
| BDH2       | ENSG00000164039 | -2.014601436 | 2.522E-11  |
| IL11       | ENSG00000095752 | 1.10308713   | 2.5221E-11 |
| PECR       | ENSG00000115425 | -1.009662825 | 2.7902E-11 |
| GSTM4      | ENSG00000168765 | -2.196368733 | 2.7969E-11 |
| CDCA7      | ENSG00000144354 | -1.000388827 | 2.8048E-11 |
| ENO1P1     | ENSG00000244457 | -2.950069047 | 2.9971E-11 |
| RIOK3      | ENSG00000101782 | 1.15278013   | 3.0326E-11 |
| UPK3B      | ENSG00000243566 | -1.278498873 | 3.1488E-11 |
| AC100803.2 | ENSG00000261655 | -4.062615928 | 3.16E-11   |
| GYG2       | ENSG00000056998 | -1.963190442 | 3.3634E-11 |

|            |                 |              |            |
|------------|-----------------|--------------|------------|
| YRDC       | ENSG00000196449 | 1.02822305   | 3.421E-11  |
| LMTK3      | ENSG00000142235 | -1.511916562 | 3.6267E-11 |
| ZNF516     | ENSG00000101493 | -1.337213904 | 3.689E-11  |
| HAUS3      | ENSG00000214367 | 1.10054087   | 3.8276E-11 |
| FBXW7      | ENSG00000109670 | 1.11525089   | 3.9084E-11 |
| RARRES3    | ENSG00000133321 | -1.479218485 | 4.123E-11  |
| PDK3       | ENSG00000067992 | -1.241935032 | 4.4651E-11 |
| ZNF618     | ENSG00000157657 | -1.274798448 | 4.6615E-11 |
| RGS3       | ENSG00000138835 | -1.156387347 | 4.8607E-11 |
| RNF157     | ENSG00000141576 | -1.251807784 | 5.3535E-11 |
| REL        | ENSG00000162924 | 1.00189922   | 5.613E-11  |
| AC239868.1 | ENSG00000261716 | 1.09533182   | 6.1589E-11 |
| OPHN1      | ENSG00000079482 | -1.173554870 | 6.1623E-11 |
| AC008560.1 | ENSG00000253251 | 1.72168015   | 6.4816E-11 |
| C5AR1      | ENSG00000197405 | -2.328011469 | 6.5267E-11 |
| CLDN15     | ENSG00000106404 | 1.16705763   | 6.6854E-11 |
| CHST12     | ENSG00000136213 | -1.103239247 | 7.0004E-11 |
| ZNF267     | ENSG00000185947 | 1.02320148   | 7.3231E-11 |
| KREMEN1    | ENSG00000183762 | -1.167711012 | 8.0136E-11 |
| MMP9       | ENSG00000100985 | 5.50729572   | 8.9578E-11 |
| SPOCK1     | ENSG00000152377 | 1.40543645   | 9.5746E-11 |
| DNAJC27    | ENSG00000115137 | 1.63044518   | 1.1012E-10 |
| KCTD7      | ENSG00000243335 | -1.303252777 | 1.1221E-10 |
| PLA2R1     | ENSG00000153246 | -1.499087707 | 1.3582E-10 |
| ADAM23     | ENSG00000114948 | -1.054129222 | 1.3841E-10 |
| BLOC1S1    | ENSG00000135441 | -1.216975164 | 1.4743E-10 |
| HAUS4      | ENSG00000092036 | -1.031540582 | 1.541E-10  |
| RGS20      | ENSG00000147509 | 1.30975252   | 1.6174E-10 |
| ADGRB2     | ENSG00000121753 | -1.090756003 | 1.6761E-10 |
| RNF43      | ENSG00000108375 | -1.776702457 | 1.7238E-10 |
| BIRC7      | ENSG00000101197 | -1.786457198 | 1.7872E-10 |
| ITGB6      | ENSG00000115221 | -1.465317747 | 1.803E-10  |
| PDPK2P     | ENSG00000205918 | 1.38959126   | 1.8906E-10 |
| AC016831.7 | ENSG00000285106 | -1.685416585 | 2.0553E-10 |
| ZNF703     | ENSG00000183779 | -1.702773396 | 2.0771E-10 |
| AP000439.2 | ENSG00000255774 | -1.447483183 | 2.2181E-10 |
| CCT6P3     | ENSG00000234585 | 1.41601215   | 2.4049E-10 |
| PCDHAC2    | ENSG00000243232 | -1.271196797 | 2.5189E-10 |
| VSIG10L    | ENSG00000186806 | -1.287032253 | 2.5817E-10 |
| MOK        | ENSG00000080823 | 1.12462513   | 2.6988E-10 |
| THRB       | ENSG00000151090 | -1.104204492 | 2.7344E-10 |
| IL1R2      | ENSG00000115590 | -1.436172719 | 2.8079E-10 |
| HSD17B7    | ENSG00000132196 | 1.15525096   | 2.8701E-10 |
| JMJD4      | ENSG00000081692 | -1.057532223 | 2.9348E-10 |
| ATXN7      | ENSG00000163635 | 1.10076587   | 3.1214E-10 |
| TNFRSF1A   | ENSG00000067182 | -1.193000046 | 3.1417E-10 |
| PCYOX1L    | ENSG00000145882 | -1.994973542 | 3.5195E-10 |
| HADH       | ENSG00000138796 | -1.078280887 | 4.4636E-10 |
| CD163L1    | ENSG00000177675 | 2.56716765   | 5.0834E-10 |
| HIST2H2BE  | ENSG00000184678 | 1.06647058   | 5.6707E-10 |
| HS3ST6     | ENSG00000162040 | -1.486643662 | 5.8736E-10 |
| STAT4      | ENSG00000138378 | -1.503996618 | 5.9041E-10 |
| CACNG6     | ENSG00000130433 | -1.185841310 | 5.9766E-10 |
| SLC22A1    | ENSG00000175003 | 3.76676609   | 6.0787E-10 |
| ANO5       | ENSG00000171714 | -1.006040300 | 6.6491E-10 |
| CASTOR2    | ENSG00000274070 | -1.814958007 | 6.7658E-10 |
| ORC1       | ENSG00000085840 | -1.043929116 | 7.1375E-10 |
| NAGA       | ENSG00000198951 | -1.067001216 | 7.6154E-10 |

|            |                 |             |            |
|------------|-----------------|-------------|------------|
| SGK3       | ENSG00000104205 | 1.15856274  | 7.8909E-10 |
| DNMT3A     | ENSG00000119772 | -1.08294666 | 8.0041E-10 |
| WBP4       | ENSG00000120688 | 1.04062582  | 8.1047E-10 |
| SH3BGRL2   | ENSG00000198478 | -1.35959508 | 8.6513E-10 |
| NFKBIL1    | ENSG00000204498 | 1.0557623   | 8.9652E-10 |
| CENPS      | ENSG00000175279 | -1.18180139 | 9.6482E-10 |
| WNK2       | ENSG00000165238 | -1.21811662 | 9.875E-10  |
| GALNT9     | ENSG00000182870 | 2.40618201  | 1.0145E-09 |
| AP002373.1 | ENSG00000255663 | 6.22426151  | 1.0621E-09 |
| KRT7-AS    | ENSG00000257671 | -1.04021137 | 1.1241E-09 |
| BX890604.1 | ENSG00000205664 | 1.28633666  | 1.1385E-09 |
| MAPK8IP1   | ENSG00000121653 | 1.39233816  | 1.1441E-09 |
| PISD       | ENSG00000241878 | 1.02427691  | 1.1618E-09 |
| HMG3       | ENSG00000118418 | -1.02666335 | 1.258E-09  |
| MIR29B2CHG | ENSG00000203709 | -1.33733419 | 1.2897E-09 |
| CCR7       | ENSG00000126353 | -2.03043994 | 1.4426E-09 |
| SYT6       | ENSG00000134207 | -1.21752916 | 1.4676E-09 |
| NFXL1      | ENSG00000170448 | 1.00653767  | 1.4774E-09 |
| CENPL      | ENSG00000120334 | 1.13139714  | 1.5371E-09 |
| GUCY2EP    | ENSG00000204529 | -5.72151529 | 1.5378E-09 |
| MAP3K8     | ENSG00000107968 | -1.03872307 | 1.5401E-09 |
| TMEM102    | ENSG00000181284 | -1.17002774 | 1.6575E-09 |
| TMTC2      | ENSG00000179104 | -1.26266649 | 1.7658E-09 |
| CCDC186    | ENSG00000165813 | 1.12645166  | 1.8539E-09 |
| RHCG       | ENSG00000140519 | 1.28133271  | 1.8744E-09 |
| EPHX2      | ENSG00000120915 | -1.37150078 | 1.878E-09  |
| MGST2      | ENSG00000085871 | -1.23281852 | 1.9105E-09 |
| ZNF704     | ENSG00000164684 | -1.03319191 | 1.9432E-09 |
| DUSP10     | ENSG00000143507 | 1.21546092  | 2.0278E-09 |
| AC243772.2 | ENSG00000233030 | 3.90313453  | 2.0848E-09 |
| THBD       | ENSG00000178726 | 1.0761744   | 2.1108E-09 |
| HIST1H2BN  | ENSG00000233822 | 1.66089852  | 2.1761E-09 |
| CEBPD      | ENSG00000221869 | -1.02358752 | 2.195E-09  |
| BRF2       | ENSG00000104221 | 1.08168817  | 2.2193E-09 |
| AC110079.1 | ENSG00000260404 | 1.04603741  | 2.2207E-09 |
| FAM46B     | ENSG00000158246 | 2.02637681  | 2.3903E-09 |
| LINC01106  | ENSG00000175772 | -1.35610526 | 2.5016E-09 |
| CREB5      | ENSG00000146592 | 1.09449253  | 2.5711E-09 |
| MPP2       | ENSG00000108852 | -1.89122451 | 2.6664E-09 |
| VWA1       | ENSG00000179403 | -1.83877917 | 2.8887E-09 |
| TPD52L1    | ENSG00000111907 | -1.03468022 | 2.9013E-09 |
| ZFP14      | ENSG00000142065 | -1.20946808 | 2.9353E-09 |
| MAP3K14-AS | ENSG00000267278 | -1.59378643 | 2.9978E-09 |
| SESN1      | ENSG00000080546 | 1.13700289  | 3.1641E-09 |
| NEXN       | ENSG00000162614 | 2.31990454  | 3.2015E-09 |
| SSBP4      | ENSG00000130511 | -1.00512609 | 3.3656E-09 |
| FER1L4     | ENSG00000088340 | -1.45311647 | 3.6997E-09 |
| EXOC3L4    | ENSG00000205436 | -2.25136929 | 4.0274E-09 |
| SH2D5      | ENSG00000189410 | 1.88757364  | 4.1343E-09 |
| HUNK       | ENSG00000142149 | -1.59843520 | 4.5835E-09 |
| IBA57      | ENSG00000181873 | 1.25758559  | 4.5987E-09 |
| AC092118.1 | ENSG00000187185 | -1.28731611 | 4.7617E-09 |
| NCF2       | ENSG00000116701 | 1.05078282  | 5.0585E-09 |
| C19orf66   | ENSG00000130813 | -1.07016830 | 5.1896E-09 |
| NKX2-5     | ENSG00000183072 | 1.38888145  | 5.3109E-09 |
| ANO1       | ENSG00000131620 | 1.90438372  | 5.4394E-09 |
| BDNF       | ENSG00000176697 | -1.43111506 | 6.0366E-09 |
| AL391427.1 | ENSG00000224251 | -1.87480812 | 6.4605E-09 |

|            |                 |              |            |
|------------|-----------------|--------------|------------|
| SRPX2      | ENSG00000102359 | -1.322962020 | 7.4874E-09 |
| POLK       | ENSG00000122008 | 1.04577827   | 7.7486E-09 |
| AC007191.1 | ENSG00000279407 | -1.590454357 | 8.273E-09  |
| RF00096    | ENSG00000238840 | -1.680652095 | 8.3652E-09 |
| DGKE       | ENSG00000153933 | 1.21058209   | 8.7219E-09 |
| SLC46A3    | ENSG00000139508 | -1.283269350 | 8.7551E-09 |
| GACAT2     | ENSG00000265962 | -1.683147860 | 9.57E-09   |
| OSBPL5     | ENSG00000021762 | -1.183189508 | 9.7173E-09 |
| AC027290.2 | ENSG00000280138 | 1.51189816   | 9.7512E-09 |
| PPT2       | ENSG00000221988 | -1.210672302 | 9.7699E-09 |
| ADRA1D     | ENSG00000171873 | -1.850292338 | 1.0078E-08 |
| AGFG2      | ENSG00000106351 | -1.127732337 | 1.0251E-08 |
| ATP7B      | ENSG00000123191 | -1.153336052 | 1.0267E-08 |
| DUSP7      | ENSG00000164086 | 1.0846991    | 1.0697E-08 |
| ZNF317     | ENSG00000130803 | 1.28573198   | 1.0827E-08 |
| DHODH      | ENSG00000102967 | -1.050599560 | 1.0874E-08 |
| CLIP4      | ENSG00000115295 | 1.03285316   | 1.1153E-08 |
| ITPKA      | ENSG00000137825 | 2.16537479   | 1.1343E-08 |
| RNA5-8SN3  | ENSG00000278233 | 2.28345982   | 1.2835E-08 |
| AC044849.1 | ENSG00000272256 | 3.60600008   | 1.3362E-08 |
| RPLP0P2    | ENSG00000243742 | 2.52448003   | 1.4158E-08 |
| ENTPD2     | ENSG00000054179 | -3.048473670 | 1.4342E-08 |
| IER5L      | ENSG00000188483 | -1.401754342 | 1.4404E-08 |
| INSL4      | ENSG00000120211 | -1.201458790 | 1.4592E-08 |
| AC095055.1 | ENSG00000270681 | 3.0599335    | 1.5447E-08 |
| SCN1B      | ENSG00000105711 | -1.185847140 | 1.5523E-08 |
| ZNF841     | ENSG00000197608 | 1.35631721   | 1.5631E-08 |
| HIST2H2AA3 | ENSG00000203812 | 1.07521104   | 1.5996E-08 |
| MEG3       | ENSG00000214548 | 1.72285877   | 1.6016E-08 |
| CYP4F12    | ENSG00000186204 | -1.551626142 | 1.6113E-08 |
| MAP6D1     | ENSG00000180834 | -3.758999137 | 1.6155E-08 |
| IFRD1      | ENSG00000006652 | 1.45100643   | 1.6197E-08 |
| HIST2H2AA4 | ENSG00000272196 | 1.070244     | 1.675E-08  |
| AC125421.1 | ENSG00000263574 | Inf          | 1.7248E-08 |
| ARL14      | ENSG00000179674 | 2.02036431   | 1.7517E-08 |
| LRRN2      | ENSG00000170382 | -1.091262360 | 1.8158E-08 |
| GMDS       | ENSG00000112699 | -1.215861030 | 1.8568E-08 |
| MYO7A      | ENSG00000137474 | 1.35931258   | 1.9015E-08 |
| ZSCAN31    | ENSG00000235109 | 1.41483536   | 1.9345E-08 |
| LCN2       | ENSG00000148346 | 1.20094329   | 2.022E-08  |
| CFAP69     | ENSG00000105792 | 1.51638829   | 2.0882E-08 |
| AC027601.1 | ENSG00000260005 | 1.70329068   | 2.1111E-08 |
| C9orf152   | ENSG00000188959 | -2.996559853 | 2.1487E-08 |
| BAIAP2-AS1 | ENSG00000226137 | -1.210674177 | 2.1511E-08 |
| VIL1       | ENSG00000127831 | -2.352444947 | 2.329E-08  |
| ST6GAL1    | ENSG00000073849 | -1.198231987 | 2.4079E-08 |
| SEMA3A     | ENSG00000075213 | -1.069837570 | 2.6031E-08 |
| VTN        | ENSG00000109072 | -1.300667130 | 2.7226E-08 |
| KCNMA1     | ENSG00000156113 | 1.34579532   | 2.8074E-08 |
| TGFBR3     | ENSG00000069702 | -1.037763780 | 2.8886E-08 |
| LINC02532  | ENSG00000235142 | -2.181072388 | 2.9153E-08 |
| AC007325.4 | ENSG00000278817 | -1.610046035 | 3.1496E-08 |
| AC023157.3 | ENSG00000276900 | 1.74935729   | 3.2101E-08 |
| SCARA5     | ENSG00000168079 | -2.520165470 | 3.2926E-08 |
| PCDH1      | ENSG00000156453 | 1.37638871   | 3.3E-08    |
| RAB39B     | ENSG00000155961 | 1.12989009   | 3.4314E-08 |
| RRAS2      | ENSG00000133818 | 1.0145585    | 3.8779E-08 |
| SLC19A3    | ENSG00000135917 | -1.125335443 | 4.0422E-08 |



|            |                 |             |            |
|------------|-----------------|-------------|------------|
| ETV1       | ENSG00000006468 | -1.17242223 | 4.1033E-08 |
| ZNF211     | ENSG00000121417 | 1.11579967  | 4.1743E-08 |
| MIR22HG    | ENSG00000186594 | 1.47526516  | 4.4698E-08 |
| IGFLR1     | ENSG00000126246 | -2.11795912 | 4.7906E-08 |
| GRB7       | ENSG00000141738 | -1.10718538 | 4.8545E-08 |
| UNC13A     | ENSG00000130477 | -1.07990294 | 4.8994E-08 |
| KRT15      | ENSG00000171346 | 1.94802138  | 4.989E-08  |
| KRT8       | ENSG00000170421 | -1.17797732 | 5.1031E-08 |
| NOVA1      | ENSG00000139910 | -1.13993313 | 5.4184E-08 |
| ZNF484     | ENSG00000127081 | 1.06891378  | 5.6097E-08 |
| KAZN       | ENSG00000189337 | -1.55244442 | 5.8019E-08 |
| HRK        | ENSG00000135116 | 2.23106141  | 5.8373E-08 |
| FMO5       | ENSG00000131781 | -2.17673514 | 6.2303E-08 |
| RNA5-8S4   | ENSG00000276700 | 2.31506985  | 6.3188E-08 |
| LINC01006  | ENSG00000182648 | 1.36951869  | 6.5212E-08 |
| RNA5-8SN1  | ENSG00000275757 | 2.34266059  | 6.6863E-08 |
| AC083899.2 | ENSG00000233671 | 4.63157547  | 7.2093E-08 |
| AKR1C4     | ENSG00000198610 | -2.47335463 | 7.3672E-08 |
| GRB14      | ENSG00000115290 | -1.27478940 | 7.3836E-08 |
| SAMD4A     | ENSG00000020577 | 1.2475251   | 7.427E-08  |
| CYP2S1     | ENSG00000167600 | -1.08446943 | 7.5367E-08 |
| SMG1P3     | ENSG00000180747 | 1.43554938  | 9.0294E-08 |
| POLA2      | ENSG00000014138 | -1.00728959 | 9.7075E-08 |
| ITIH2      | ENSG00000151655 | -2.08032907 | 9.8143E-08 |
| AC124067.4 | ENSG00000254290 | -3.88212633 | 9.9623E-08 |
| HIST1H1E   | ENSG00000168298 | 2.7255007   | 1.0444E-07 |
| SHISAL1    | ENSG00000138944 | 1.27240581  | 1.0882E-07 |
| MAST3      | ENSG00000099308 | -1.25768710 | 1.1013E-07 |
| LHX2       | ENSG00000106689 | -1.66994199 | 1.1504E-07 |
| RRAD       | ENSG00000166592 | 2.26748741  | 1.1537E-07 |
| PHLDA3     | ENSG00000174307 | 1.3776078   | 1.1647E-07 |
| STK19      | ENSG00000204344 | 1.0776268   | 1.1673E-07 |
| AL033397.1 | ENSG00000231683 | -1.13113601 | 1.1983E-07 |
| DOC2B      | ENSG00000272636 | -1.83624737 | 1.1997E-07 |
| NRGN       | ENSG00000154146 | -2.70861615 | 1.2908E-07 |
| SIPA1      | ENSG00000213445 | -1.14759266 | 1.3016E-07 |
| WIP1       | ENSG00000070540 | 1.00193836  | 1.3367E-07 |
| PRG4       | ENSG00000116690 | -1.70347697 | 1.369E-07  |
| AL451069.3 | ENSG00000234311 | -2.93188553 | 1.3873E-07 |
| FAM24B     | ENSG00000213185 | 1.17116204  | 1.4041E-07 |
| AC108751.5 | ENSG00000244503 | -3.13864050 | 1.4477E-07 |
| HHIP-AS1   | ENSG00000248890 | -2.43871569 | 1.4504E-07 |
| TFCP2L1    | ENSG00000115112 | -1.01351989 | 1.4856E-07 |
| RBP4       | ENSG00000138207 | -1.93956918 | 1.5004E-07 |
| SP6        | ENSG00000189120 | 1.43825763  | 1.5137E-07 |
| CCDC96     | ENSG00000173013 | 1.98408429  | 1.6188E-07 |
| ZNF669     | ENSG00000188295 | 1.69519594  | 1.6311E-07 |
| AOX1       | ENSG00000138356 | 1.10206254  | 1.6845E-07 |
| MGAT5      | ENSG00000152127 | -1.59990500 | 1.7244E-07 |
| RRAGC      | ENSG00000116954 | 1.09593568  | 1.7396E-07 |
| CD302      | ENSG00000241399 | -2.03494775 | 1.8143E-07 |
| RHBDL3     | ENSG00000141314 | -1.99256736 | 1.8755E-07 |
| AC097359.2 | ENSG00000270194 | 1.46094984  | 1.9164E-07 |
| FAM19A5    | ENSG00000219438 | -1.33685765 | 1.9363E-07 |
| MAPT       | ENSG00000186868 | -1.89678660 | 2.0029E-07 |
| CRYAB      | ENSG00000109846 | -3.48682466 | 2.0834E-07 |
| ENPP1      | ENSG00000197594 | -1.07147929 | 2.1282E-07 |
| RHOU       | ENSG00000116574 | -1.00084867 | 2.1318E-07 |

|             |                 |             |            |
|-------------|-----------------|-------------|------------|
| ASIC1       | ENSG00000110881 | -1.52129566 | 2.1357E-07 |
| ABCC6       | ENSG00000091262 | -2.09001725 | 2.2486E-07 |
| ZNF383      | ENSG00000188283 | 1.32880311  | 2.3811E-07 |
| POLR3GL     | ENSG00000121851 | -1.09504038 | 2.4983E-07 |
| AL356585.2  | ENSG00000279124 | 1.57681817  | 2.5312E-07 |
| KRT8P3      | ENSG00000254285 | -1.31410231 | 2.5782E-07 |
| PLEKHH2     | ENSG00000152527 | -1.20741330 | 2.6121E-07 |
| SNAP25-AS1  | ENSG00000227906 | -2.04364424 | 2.7103E-07 |
| TRIM31      | ENSG00000204616 | -2.20900676 | 2.7275E-07 |
| ZFP28       | ENSG00000196867 | 1.06138829  | 2.7732E-07 |
| ZNF16       | ENSG00000170631 | 1.14279713  | 2.8477E-07 |
| ADAM19      | ENSG00000135074 | -1.58759298 | 3.1804E-07 |
| RNASEL      | ENSG00000135828 | -1.33045688 | 3.2012E-07 |
| ZBTB32      | ENSG00000011590 | -1.17938718 | 3.2075E-07 |
| BCL6        | ENSG00000113916 | -1.07507228 | 3.2401E-07 |
| HYKK        | ENSG00000188266 | -1.41163643 | 3.2427E-07 |
| SH3BP1      | ENSG00000100092 | -1.93238590 | 3.3945E-07 |
| RNF103-CHM  | ENSG00000249884 | 3.52373107  | 3.4928E-07 |
| ADAMTS16    | ENSG00000145536 | 1.547529    | 3.547E-07  |
| HIST1H2BC   | ENSG00000180596 | 1.38413232  | 3.6498E-07 |
| EFHD1       | ENSG00000115468 | -2.03060292 | 3.819E-07  |
| ACOX2       | ENSG00000168306 | -1.71222475 | 3.8202E-07 |
| N4BP2       | ENSG00000078177 | 1.13612018  | 3.9318E-07 |
| UBXN11      | ENSG00000158062 | 1.07503947  | 3.996E-07  |
| GPR3        | ENSG00000181773 | 1.33632414  | 4.1401E-07 |
| OLAH        | ENSG00000152463 | 2.44317041  | 4.3376E-07 |
| ZNF805      | ENSG00000204524 | 1.38941702  | 4.4975E-07 |
| VASH1       | ENSG00000071246 | -1.35188441 | 4.6207E-07 |
| BACE2       | ENSG00000182240 | -1.05241664 | 4.6802E-07 |
| SENP3-EIF4A | ENSG00000277957 | 1.2702012   | 4.7047E-07 |
| AC010997.3  | ENSG00000270087 | -Inf        | 4.845E-07  |
| IL32        | ENSG00000008517 | 1.25018603  | 5.0124E-07 |
| ACHE        | ENSG00000087085 | 1.31732443  | 5.1729E-07 |
| KIF26A      | ENSG00000066735 | -1.13398540 | 5.1992E-07 |
| HACD2       | ENSG00000206527 | 1.60149739  | 5.254E-07  |
| NUDT7       | ENSG00000140876 | -1.59427733 | 5.2554E-07 |
| TRIM36      | ENSG00000152503 | 1.38984873  | 5.3111E-07 |
| RF00096     | ENSG00000239148 | -1.51152067 | 5.4625E-07 |
| STARD8      | ENSG00000130052 | -1.97704496 | 5.4783E-07 |
| PXMP4       | ENSG00000101417 | -1.06853216 | 5.5722E-07 |
| MICALL1     | ENSG00000100139 | 1.222693    | 5.8929E-07 |
| HIST2H4A    | ENSG00000270882 | 1.9003625   | 6.1134E-07 |
| GNAL        | ENSG00000141404 | 1.39033833  | 6.1558E-07 |
| ZNF792      | ENSG00000180884 | -1.86082808 | 6.1825E-07 |
| MB          | ENSG00000198125 | -2.22261385 | 6.2054E-07 |
| RUNX3       | ENSG00000020633 | -1.01643826 | 6.3779E-07 |
| RAB3A       | ENSG00000105649 | -3.01397962 | 6.7286E-07 |
| PLXNB3      | ENSG00000198753 | 1.35659155  | 6.8429E-07 |
| GNAZ        | ENSG00000128266 | -1.36035293 | 7.0583E-07 |
| GSEC        | ENSG00000280832 | -2.09416811 | 7.1305E-07 |
| RRP7BP      | ENSG00000182841 | -1.17834395 | 7.3611E-07 |
| AC092327.2  | ENSG00000269826 | 2.01371072  | 7.5997E-07 |
| VSTM2L      | ENSG00000132821 | -2.27441247 | 7.6361E-07 |
| GJB3        | ENSG00000188910 | 2.25309927  | 7.9272E-07 |
| DCDC2C      | ENSG00000214866 | 3.04343397  | 8.0635E-07 |
| AC008105.3  | ENSG00000267121 | -1.62064038 | 9.2446E-07 |
| CAVIN4      | ENSG00000170681 | 2.12592468  | 9.6033E-07 |
| FO681492.1  | ENSG00000277758 | -1.77542379 | 9.6119E-07 |

|             |                 |              |            |
|-------------|-----------------|--------------|------------|
| ZNF416      | ENSG00000083817 | 1.08584055   | 9.6348E-07 |
| FXYD6       | ENSG00000137726 | -1.874237030 | 9.829E-07  |
| JAK3        | ENSG00000105639 | -1.497229288 | 9.8499E-07 |
| OCEL1       | ENSG00000099330 | -1.680964037 | 1.0147E-06 |
| AC107959.2  | ENSG00000246130 | 2.75783629   | 1.0154E-06 |
| PDE7B       | ENSG00000171408 | -1.376959192 | 1.0416E-06 |
| OSGEPL1     | ENSG00000128694 | -1.069304870 | 1.0518E-06 |
| RP9P        | ENSG00000205763 | 1.02922875   | 1.109E-06  |
| MACROD1     | ENSG00000133315 | -1.219456256 | 1.1095E-06 |
| NXN         | ENSG00000167693 | -1.134030834 | 1.1131E-06 |
| SEPT7P2     | ENSG00000214765 | 1.04227054   | 1.145E-06  |
| ZNF57       | ENSG00000171970 | 1.37379229   | 1.1763E-06 |
| KHK         | ENSG00000138030 | -1.174391682 | 1.1913E-06 |
| PEA15       | ENSG00000162734 | 1.08321926   | 1.3137E-06 |
| PLCL2       | ENSG00000154822 | 1.08055179   | 1.3215E-06 |
| CTNNBIP1    | ENSG00000178585 | -1.137016335 | 1.326E-06  |
| ASRGL1      | ENSG00000162174 | -1.276891522 | 1.3261E-06 |
| ZBTB21      | ENSG00000173276 | 1.37000958   | 1.3349E-06 |
| C4BPA       | ENSG00000123838 | -2.853868060 | 1.3407E-06 |
| ANXA9       | ENSG00000143412 | -2.479504240 | 1.4356E-06 |
| ZNF565      | ENSG00000196357 | 1.29523543   | 1.4588E-06 |
| TLE6        | ENSG00000104953 | -2.513937366 | 1.5941E-06 |
| SLC17A1     | ENSG00000124568 | -3.484977903 | 1.6711E-06 |
| GATA3       | ENSG00000107485 | 1.55482559   | 1.7272E-06 |
| NES         | ENSG00000132688 | -1.965053487 | 1.737E-06  |
| CD300LB     | ENSG00000178789 | 4.08058162   | 1.8066E-06 |
| PDIK1L      | ENSG00000175087 | 1.0777716    | 1.8375E-06 |
| LRRC4B      | ENSG00000131409 | -2.026340490 | 1.9047E-06 |
| KBTBD11-OT  | ENSG00000283239 | 2.56276176   | 1.9415E-06 |
| TMEM198     | ENSG00000188760 | 1.43715599   | 2.0121E-06 |
| BCO1        | ENSG00000135697 | -1.600339806 | 2.0871E-06 |
| C2orf72     | ENSG00000204128 | -1.167256560 | 2.0916E-06 |
| ZNF543      | ENSG00000178229 | 1.19165588   | 2.1084E-06 |
| RGPD6       | ENSG00000183054 | 1.22102869   | 2.137E-06  |
| SAMHD1      | ENSG00000101347 | -1.062194623 | 2.2048E-06 |
| PDE4B       | ENSG00000184588 | -1.290747924 | 2.2155E-06 |
| NGF         | ENSG00000134259 | 2.42802105   | 2.2183E-06 |
| EGR2        | ENSG00000122877 | 2.27190923   | 2.2722E-06 |
| FBXO2       | ENSG00000116661 | -1.862430657 | 2.5129E-06 |
| MIR194-2HG  | ENSG00000229719 | -1.726375782 | 2.5482E-06 |
| AC087388.1  | ENSG00000262251 | 1.32909931   | 2.6126E-06 |
| VANGL2      | ENSG00000162738 | -1.082163557 | 2.6391E-06 |
| SLX1A-SULT1 | ENSG00000213599 | -1.014147497 | 2.7997E-06 |
| ZNF350      | ENSG00000256683 | 1.20815206   | 2.8583E-06 |
| ABLIM3      | ENSG00000173210 | 2.23309298   | 2.8956E-06 |
| RNA5-8SN3   | ENSG00000278189 | 3.05878462   | 3.1047E-06 |
| CTSV        | ENSG00000136943 | -1.227463336 | 3.1202E-06 |
| UNC5CL      | ENSG00000124602 | -2.027846155 | 3.1319E-06 |
| ZNF222      | ENSG00000159885 | 1.08344149   | 3.2069E-06 |
| C1R         | ENSG00000159403 | -1.338275367 | 3.2331E-06 |
| C10orf111   | ENSG00000176236 | 3.20039267   | 3.2409E-06 |
| GAMT        | ENSG00000130005 | -1.056688968 | 3.3476E-06 |
| AC004918.3  | ENSG00000270157 | -1.424384897 | 3.4496E-06 |
| LINC00313   | ENSG00000185186 | -2.252267857 | 3.5463E-06 |
| NR2F1       | ENSG00000175745 | -1.084282295 | 3.5534E-06 |
| GCSAM       | ENSG00000174500 | 1.64104676   | 3.8097E-06 |
| FAM171A2    | ENSG00000161682 | -1.651120300 | 3.865E-06  |
| ONECUT2     | ENSG00000119547 | -1.029373055 | 4.0684E-06 |

|            |                 |             |            |
|------------|-----------------|-------------|------------|
| ZNF502     | ENSG00000196653 | 1.37549723  | 4.0852E-06 |
| AC120057.3 | ENSG00000279641 | 2.51708562  | 4.0999E-06 |
| GSTA4      | ENSG00000170899 | -1.10712283 | 4.1333E-06 |
| CLYBL      | ENSG00000125246 | -1.53612686 | 4.4416E-06 |
| CD37       | ENSG00000104894 | -2.43361072 | 4.4633E-06 |
| CHST2      | ENSG00000175040 | 1.87801963  | 4.626E-06  |
| DHRS9      | ENSG00000073737 | 2.468521    | 4.7231E-06 |
| CHMP4BP1   | ENSG00000258469 | 3.40058947  | 4.7536E-06 |
| COX10-AS1  | ENSG00000236088 | -1.18349962 | 4.8066E-06 |
| ZNF426     | ENSG00000130818 | 1.16223253  | 4.9273E-06 |
| ZBTB8A     | ENSG00000160062 | 1.27616733  | 4.9675E-06 |
| LGI3       | ENSG00000168481 | -2.37748613 | 5.3506E-06 |
| AL031009.1 | ENSG00000278987 | 1.94082439  | 5.4633E-06 |
| RAD54B     | ENSG00000197275 | -1.00293053 | 5.5036E-06 |
| PRODH2     | ENSG00000250799 | -2.94596016 | 5.5131E-06 |
| CCDC85B    | ENSG00000175602 | 1.03779421  | 5.5195E-06 |
| LFNG       | ENSG00000106003 | -1.35962740 | 5.5372E-06 |
| CRYM-AS1   | ENSG00000189149 | 1.9147328   | 5.9628E-06 |
| IDI1       | ENSG00000067064 | 1.0434381   | 6.1942E-06 |
| BIVM       | ENSG00000134897 | -1.15692523 | 6.2134E-06 |
| DOC2A      | ENSG00000149927 | -1.76844236 | 6.2805E-06 |
| AC012360.3 | ENSG00000272994 | 1.17381251  | 6.3674E-06 |
| HPDL       | ENSG00000186603 | -1.44103536 | 6.53E-06   |
| TRIM34     | ENSG00000258659 | -1.20864090 | 6.5636E-06 |
| BMI1       | ENSG00000168283 | 1.13390806  | 7.1435E-06 |
| NPIPA3     | ENSG00000224712 | 5.49881069  | 7.28E-06   |
| ZNF460     | ENSG00000197714 | 1.23874354  | 7.353E-06  |
| TRIM2      | ENSG00000109654 | -1.17906748 | 7.3578E-06 |
| URGCP-MRP3 | ENSG00000270617 | Inf         | 7.5314E-06 |
| AP000523.1 | ENSG00000215270 | -1.84598983 | 7.5435E-06 |
| ZBTB42     | ENSG00000179627 | -1.09117496 | 7.6127E-06 |
| DEDD2      | ENSG00000160570 | 1.03462868  | 7.8123E-06 |
| COL17A1    | ENSG00000065618 | 1.50965748  | 7.956E-06  |
| LINC00346  | ENSG00000255874 | 1.82440919  | 7.9885E-06 |
| LINC01123  | ENSG00000204588 | -2.04892455 | 8.039E-06  |
| AK7        | ENSG00000140057 | -1.25386086 | 8.5718E-06 |
| PDZK1      | ENSG00000174827 | -1.32996996 | 9.2013E-06 |
| HIST2H2BF  | ENSG00000203814 | 1.47585443  | 9.2286E-06 |
| GPR35      | ENSG00000178623 | -1.55632848 | 9.3093E-06 |
| FOXD1      | ENSG00000251493 | 1.14367412  | 9.4866E-06 |
| AL353743.1 | ENSG00000165121 | 1.66716442  | 1.0214E-05 |
| AL441992.1 | ENSG00000223478 | -1.76464529 | 1.0558E-05 |
| ZNF569     | ENSG00000196437 | 1.05930124  | 1.0661E-05 |
| NKAIN4     | ENSG00000101198 | -1.71659763 | 1.0973E-05 |
| LACC1      | ENSG00000179630 | 1.10127101  | 1.1056E-05 |
| TLN2       | ENSG00000171914 | -1.02117083 | 1.1173E-05 |
| AC005696.1 | ENSG00000262050 | -Inf        | 1.1622E-05 |
| ZNF268     | ENSG00000090612 | 1.00223775  | 1.1773E-05 |
| MFSD3      | ENSG00000167700 | -1.35539671 | 1.1886E-05 |
| SLC9A3R1   | ENSG00000109062 | -1.55876635 | 1.1893E-05 |
| RASSF10    | ENSG00000189431 | -1.51180879 | 1.1948E-05 |
| GPR146     | ENSG00000164849 | 2.23874967  | 1.2083E-05 |
| HIST1H4H   | ENSG00000158406 | 1.00031587  | 1.24E-05   |
| HS3ST3B1   | ENSG00000125430 | -1.49735911 | 1.2535E-05 |
| ZNF639     | ENSG00000121864 | 1.08049195  | 1.2748E-05 |
| AC015912.3 | ENSG00000274213 | 1.33321812  | 1.2848E-05 |
| KSR2       | ENSG00000171435 | 1.04378716  | 1.3013E-05 |
| ZNF75A     | ENSG00000162086 | 1.2557698   | 1.3548E-05 |

|            |                 |              |            |
|------------|-----------------|--------------|------------|
| CCNE2      | ENSG00000175305 | -1.126335570 | 1.3582E-05 |
| ZNF140     | ENSG00000196387 | 1.42048587   | 1.3965E-05 |
| NEURL3     | ENSG00000163121 | 1.05672111   | 1.4097E-05 |
| RNF185     | ENSG00000138942 | 1.52568843   | 1.4402E-05 |
| AC099509.1 | ENSG00000249746 | -4.113936230 | 1.56E-05   |
| AC133681.1 | ENSG00000239620 | 4.22226917   | 1.5656E-05 |
| LIMS2      | ENSG00000072163 | 1.24251242   | 1.586E-05  |
| BCL11B     | ENSG00000127152 | -1.686403392 | 1.6163E-05 |
| ABHD6      | ENSG00000163686 | -1.056134449 | 1.6171E-05 |
| TYRO3P     | ENSG00000259581 | 2.93474886   | 1.6807E-05 |
| C3orf18    | ENSG00000088543 | -1.277101813 | 1.6975E-05 |
| KCNK3      | ENSG00000171303 | -1.030768948 | 1.7101E-05 |
| DUSP9      | ENSG00000130829 | -2.918444857 | 1.7456E-05 |
| TMEM88     | ENSG00000167874 | 2.93936425   | 1.7526E-05 |
| ZNF620     | ENSG00000177842 | 1.20772968   | 1.7766E-05 |
| SNX15      | ENSG00000110025 | 1.16212442   | 1.8205E-05 |
| SRPX       | ENSG00000101955 | -1.227523205 | 1.8708E-05 |
| CEP85L     | ENSG00000111860 | 1.05316414   | 1.897E-05  |
| LPXN       | ENSG00000110031 | 1.06000735   | 1.9031E-05 |
| GALNT6     | ENSG00000139629 | -1.201475615 | 1.9353E-05 |
| CKMT1B     | ENSG00000237289 | -1.529606207 | 2.1637E-05 |
| CCL24      | ENSG00000106178 | -4.723207898 | 2.1739E-05 |
| DNAJB5     | ENSG00000137094 | 1.23559926   | 2.2144E-05 |
| IL22RA1    | ENSG00000142677 | -1.163973780 | 2.2471E-05 |
| MRAS       | ENSG00000158186 | 1.41622946   | 2.259E-05  |
| BEX4       | ENSG00000102409 | 1.54291568   | 2.2792E-05 |
| MAGEH1     | ENSG00000187601 | -1.242761478 | 2.3088E-05 |
| ARG2       | ENSG00000081181 | 2.05404488   | 2.3239E-05 |
| UGT1A2P    | ENSG00000228445 | -2.806989824 | 2.4065E-05 |
| PDXK       | ENSG00000160209 | -1.030132963 | 2.411E-05  |
| SDHAP2     | ENSG00000215837 | 1.02953098   | 2.4306E-05 |
| AL603756.1 | ENSG00000271933 | 1.29899458   | 2.4606E-05 |
| HYAL4      | ENSG00000106302 | -2.342322165 | 2.5557E-05 |
| AC009299.1 | ENSG00000225813 | 1.48854549   | 2.6401E-05 |
| EBI3       | ENSG00000105246 | -1.278089662 | 2.6428E-05 |
| TFEB       | ENSG00000112561 | -1.052876225 | 2.8589E-05 |
| CARF       | ENSG00000138380 | -1.290494112 | 2.8786E-05 |
| LINC01504  | ENSG00000225434 | -1.545351175 | 3.2275E-05 |
| AL031714.1 | ENSG00000261505 | 1.11464813   | 3.2312E-05 |
| LINC01433  | ENSG00000230176 | -1.751844528 | 3.3058E-05 |
| KCNH1      | ENSG00000143473 | 1.25726008   | 3.392E-05  |
| CTSH       | ENSG00000103811 | -1.205840366 | 3.5039E-05 |
| HIVEP1     | ENSG00000095951 | 1.40882214   | 3.5073E-05 |
| EGR4       | ENSG00000135625 | 1.64843422   | 3.6355E-05 |
| AC093525.8 | ENSG00000279520 | 1.63277084   | 3.6792E-05 |
| C11orf71   | ENSG00000180425 | -1.219225296 | 3.9881E-05 |
| TMEM165    | ENSG00000134851 | -1.214101975 | 4.0514E-05 |
| SNU13      | ENSG00000100138 | -1.309526056 | 4.1092E-05 |
| MFSD13A    | ENSG00000138111 | -1.039341448 | 4.1695E-05 |
| PDP1       | ENSG00000164951 | 1.17659146   | 4.3611E-05 |
| TMEM107    | ENSG00000179029 | -1.056294646 | 4.4789E-05 |
| FP671120.3 | ENSG00000280800 | 1.08175758   | 4.5275E-05 |
| NIPAL4     | ENSG00000172548 | 1.04006058   | 4.6183E-05 |
| PROC       | ENSG00000115718 | -1.800447947 | 4.6477E-05 |
| TM4SF5     | ENSG00000142484 | -3.196833175 | 4.8441E-05 |
| C21orf58   | ENSG00000160298 | -1.009488390 | 4.9853E-05 |
| ANXA10     | ENSG00000109511 | 3.41823726   | 5.2083E-05 |
| CBX7       | ENSG00000100307 | -1.138395916 | 5.2145E-05 |

|            |                 |             |            |
|------------|-----------------|-------------|------------|
| IFITM2     | ENSG00000185201 | -1.18784556 | 5.2389E-05 |
| AC068946.2 | ENSG00000284820 | -1.70848035 | 5.3725E-05 |
| AC008105.2 | ENSG00000233483 | -2.67027626 | 5.4576E-05 |
| MAP1LC3B2  | ENSG00000258102 | 1.50702497  | 5.6498E-05 |
| DEPTOR     | ENSG00000155792 | -2.05696918 | 5.7526E-05 |
| AC138150.2 | ENSG00000267288 | -1.17640871 | 5.8247E-05 |
| TMPO-AS1   | ENSG00000257167 | -1.24378108 | 6.1686E-05 |
| AL139099.1 | ENSG00000258377 | Inf         | 6.2266E-05 |
| KCNH3      | ENSG00000135519 | -1.38168993 | 6.2929E-05 |
| AL645608.9 | ENSG00000273443 | 1.72309963  | 6.2996E-05 |
| CFD        | ENSG00000197766 | -2.04873169 | 6.4197E-05 |
| HOXB13     | ENSG00000159184 | -1.40178204 | 6.4754E-05 |
| BHLHA15    | ENSG00000180535 | 1.53644861  | 6.4984E-05 |
| SCNN1A     | ENSG00000111319 | -1.32545718 | 6.5351E-05 |
| S1PR5      | ENSG00000180739 | -3.06321566 | 6.5944E-05 |
| TRAPPC2B   | ENSG00000256060 | 1.59768891  | 6.8028E-05 |
| AC004520.1 | ENSG00000273237 | 1.85724247  | 6.8521E-05 |
| ATXN7L2    | ENSG00000162650 | 1.63167496  | 6.8646E-05 |
| AC073611.1 | ENSG00000257605 | 2.27102291  | 6.8991E-05 |
| TUB        | ENSG00000166402 | -1.31996937 | 6.9628E-05 |
| AL121944.1 | ENSG00000272009 | 2.88100182  | 6.9803E-05 |
| LSMEM1     | ENSG00000181016 | 1.99700627  | 7.0263E-05 |
| FER        | ENSG00000151422 | 1.92296819  | 7.0675E-05 |
| AC008105.1 | ENSG00000233175 | -1.86848509 | 7.1033E-05 |
| LCAT       | ENSG00000213398 | 1.18449105  | 7.434E-05  |
| ARHGEF16   | ENSG00000130762 | -1.09044460 | 7.661E-05  |
| TMEM121    | ENSG00000184986 | -1.83811385 | 7.7776E-05 |
| EGOT       | ENSG00000235947 | 2.08331321  | 7.7782E-05 |
| AC019205.1 | ENSG00000229852 | -1.53940577 | 7.8434E-05 |
| ZUFSP      | ENSG00000153975 | 1.05539174  | 8.0131E-05 |
| TSPAN14    | ENSG00000108219 | -1.81150622 | 8.2918E-05 |
| FAM53C     | ENSG00000120709 | 1.5525908   | 8.3153E-05 |
| BTN2A3P    | ENSG00000124549 | 1.19784355  | 8.5182E-05 |
| IGFBP1     | ENSG00000146678 | 1.28363298  | 8.8984E-05 |
| TMEM170B   | ENSG00000205269 | -1.03006941 | 8.9964E-05 |
| RPL12P14   | ENSG00000224321 | 1.40174663  | 9.0755E-05 |
| ANKAR      | ENSG00000151687 | 1.29143816  | 9.1658E-05 |
| ZFYVE28    | ENSG00000159733 | -1.10685778 | 9.409E-05  |
| SULT1A4    | ENSG00000213648 | -1.66532729 | 9.547E-05  |
| ZNF30      | ENSG00000168661 | -1.06539073 | 9.6433E-05 |
| CD83       | ENSG00000112149 | 1.21792806  | 9.6661E-05 |
| AMACR      | ENSG00000242110 | -1.21893636 | 0.00010182 |
| RDH5       | ENSG00000135437 | -2.01491599 | 0.00010369 |
| UBE2Q2P1   | ENSG00000189136 | 1.07837705  | 0.0001116  |
| AC069281.2 | ENSG00000274272 | 1.73515523  | 0.00011336 |
| BCL2A1     | ENSG00000140379 | 1.24181993  | 0.00011456 |
| KCNJ2      | ENSG00000123700 | -1.52646539 | 0.00011491 |
| AC017116.1 | ENSG00000239775 | -Inf        | 0.00011587 |
| RTP4       | ENSG00000136514 | -3.99774539 | 0.00012181 |
| NPM1P26    | ENSG00000235677 | 2.21574675  | 0.00012393 |
| AL645608.3 | ENSG00000230699 | -1.96347333 | 0.00012458 |
| PAQR8      | ENSG00000170915 | -1.16083167 | 0.00012583 |
| F3         | ENSG00000117525 | 1.27204728  | 0.00012684 |
| ZFAND2A    | ENSG00000178381 | 1.0673958   | 0.00012732 |
| AC023632.6 | ENSG00000280123 | -1.07375208 | 0.00012832 |
| NPY1R      | ENSG00000164128 | -1.46003243 | 0.00012835 |
| AC133644.2 | ENSG00000273445 | -2.88431055 | 0.00012846 |
| AC140479.2 | ENSG00000230650 | -1.22929232 | 0.00012969 |

|            |                 |              |            |
|------------|-----------------|--------------|------------|
| LINC02212  | ENSG00000249396 | -1.071280782 | 0.00013121 |
| AC004233.3 | ENSG00000272079 | 1.85918374   | 0.00013207 |
| DMBX1      | ENSG00000197587 | -1.964432805 | 0.00013371 |
| GRIN3B     | ENSG00000116032 | -1.094607409 | 0.00013375 |
| CD14       | ENSG00000170458 | -1.814593778 | 0.00013494 |
| AL590399.1 | ENSG00000204802 | 1.38655932   | 0.00013504 |
| HPSE       | ENSG00000173083 | -1.335930665 | 0.00013738 |
| ARHGAP24   | ENSG00000138639 | -1.105648613 | 0.0001422  |
| PCDHAC1    | ENSG00000248383 | -1.464057872 | 0.00014642 |
| CPSF1P1    | ENSG00000214076 | -1.444962650 | 0.00014646 |
| AC078880.3 | ENSG00000271579 | 3.99492483   | 0.00014924 |
| REEP6      | ENSG00000115255 | -1.211652033 | 0.00015665 |
| TMEM74B    | ENSG00000125895 | -1.561618218 | 0.00015806 |
| AXIN2      | ENSG00000168646 | -1.289621727 | 0.00015817 |
| MIR600HG   | ENSG00000236901 | -1.172929950 | 0.00016368 |
| PLPPR3     | ENSG00000129951 | -1.460643046 | 0.00017425 |
| PRRT1B     | ENSG00000283526 | -2.81035327  | 0.00017783 |
| IL18R1     | ENSG00000115604 | -1.028239369 | 0.00019103 |
| LINC-PINT  | ENSG00000231721 | 1.35750726   | 0.00019169 |
| MZF1-AS1   | ENSG00000267858 | 1.02139293   | 0.00019971 |
| RCBTB2     | ENSG00000136161 | 1.71582952   | 0.00020128 |
| BX640514.2 | ENSG00000273812 | 5.07942209   | 0.00021116 |
| PRPS2      | ENSG00000101911 | -1.12799466  | 0.000214   |
| PRICKLE4   | ENSG00000278224 | -2.583835477 | 0.00021642 |
| CSF2       | ENSG00000164400 | 3.00312515   | 0.00021906 |
| CEMIP      | ENSG00000103888 | 1.20304127   | 0.00021946 |
| RNFT2      | ENSG00000135119 | -1.003762713 | 0.00021982 |
| TBC1D5     | ENSG00000131374 | -1.153641263 | 0.00022015 |
| HLA-DMA    | ENSG00000204257 | -1.657644313 | 0.00022527 |
| KRT20      | ENSG00000171431 | -2.463235685 | 0.00022736 |
| SLC7A5P1   | ENSG00000260727 | 1.41067992   | 0.00022821 |
| CCDC149    | ENSG00000181982 | 1.08388549   | 0.00022997 |
| AC112220.4 | ENSG00000271643 | 1.59039913   | 0.00023211 |
| AC004890.2 | ENSG00000244560 | -1.258346225 | 0.00023517 |
| PYROXD2    | ENSG00000119943 | -1.015174623 | 0.00023836 |
| BMP4       | ENSG00000125378 | -1.20788496  | 0.00024547 |
| AP000580.1 | ENSG00000219529 | 2.14635929   | 0.00024883 |
| LINC01881  | ENSG00000220804 | 1.02051588   | 0.00024984 |
| NRG2       | ENSG00000158458 | -1.241837990 | 0.00026045 |
| AC026124.2 | ENSG00000276853 | 3.02658361   | 0.00026286 |
| LINC01719  | ENSG00000233396 | -1.640590746 | 0.00026476 |
| RNA5-8SN5  | ENSG00000274917 | 2.53142007   | 0.00027435 |
| DPEP1      | ENSG00000015413 | -2.363890294 | 0.00027522 |
| FCGRT      | ENSG00000104870 | -1.515117123 | 0.00027867 |
| LINC00488  | ENSG00000214381 | -1.526578018 | 0.00028716 |
| APC        | ENSG00000134982 | -1.323505375 | 0.00028881 |
| PIP5K1A    | ENSG00000143398 | 1.28052995   | 0.00029073 |
| AC008915.2 | ENSG00000260136 | 1.18939562   | 0.00029473 |
| RGS17P1    | ENSG00000229473 | 3.36382279   | 0.00029771 |
| SPNS2      | ENSG00000183018 | 1.09823522   | 0.00030547 |
| MAFF       | ENSG00000185022 | 1.62285379   | 0.0003073  |
| ZNF331     | ENSG00000130844 | 1.03184064   | 0.00030731 |
| HIST1H4E   | ENSG00000276966 | 1.99279197   | 0.00031924 |
| TMEM164    | ENSG00000157600 | -1.026461205 | 0.00032302 |
| AKR1B10P1  | ENSG00000213606 | -1.165292287 | 0.00032875 |
| CCDC150P1  | ENSG00000256304 | 1.01332702   | 0.00032962 |
| CLDN9      | ENSG00000213937 | 2.52706349   | 0.00033309 |
| TTL6       | ENSG00000170703 | -1.404424950 | 0.00034693 |

|            |                 |              |            |
|------------|-----------------|--------------|------------|
| AC062029.1 | ENSG00000234028 | 1.54299418   | 0.00036589 |
| AC025171.2 | ENSG00000215068 | -1.173162712 | 0.0003663  |
| FERMT2     | ENSG00000073712 | 1.04301367   | 0.00036802 |
| SMG7-AS1   | ENSG00000232860 | 1.19690161   | 0.00036903 |
| QPRT       | ENSG00000103485 | -2.338448122 | 0.00037294 |
| EGFR-AS1   | ENSG00000224057 | 1.76648218   | 0.00037434 |
| CLEC11A    | ENSG00000105472 | -1.275282136 | 0.00038077 |
| AL662890.1 | ENSG00000225173 | Inf          | 0.00038187 |
| LINC01468  | ENSG00000231131 | -3.186528252 | 0.0003827  |
| S100A2     | ENSG00000196754 | 1.08448898   | 0.00039497 |
| FGF19      | ENSG00000162344 | 3.75741085   | 0.00040051 |
| PIK3R5     | ENSG00000141506 | 1.07513773   | 0.0004027  |
| SPRR2D     | ENSG00000163216 | 4.29000569   | 0.0004032  |
| ALOX12P2   | ENSG00000262943 | 1.04787301   | 0.00042922 |
| LINC01521  | ENSG00000213888 | -1.081820106 | 0.00043753 |
| JRK        | ENSG00000234616 | -1.370133383 | 0.00045501 |
| PTX3       | ENSG00000163661 | 1.02846087   | 0.00045839 |
| LYRM9      | ENSG00000232859 | -1.420605347 | 0.00047505 |
| FRAT1      | ENSG00000165879 | -1.198818057 | 0.00048048 |
| AC090181.2 | ENSG00000269951 | 1.54415191   | 0.0004901  |
| AC100757.1 | ENSG00000273679 | -1.580765687 | 0.00049322 |
| LINC02482  | ENSG00000251580 | -4.094227742 | 0.00049382 |
| MIR222HG   | ENSG00000270069 | 1.81066983   | 0.00050429 |
| AP000640.1 | ENSG00000254477 | 4.24699392   | 0.00050496 |
| PGM5P2     | ENSG00000277778 | 1.88512313   | 0.00051001 |
| RPSAP52    | ENSG00000241749 | 3.45779624   | 0.00051173 |
| AC003092.1 | ENSG00000236453 | 3.64071888   | 0.0005189  |
| MIR193BHG  | ENSG00000262454 | -1.261545912 | 0.00052707 |
| AS3MT      | ENSG00000214435 | -1.199808712 | 0.00053476 |
| RGCC       | ENSG00000102760 | -4.511037797 | 0.00054607 |
| GALK1      | ENSG00000108479 | -1.071584903 | 0.00055164 |
| FOXN3      | ENSG00000053254 | -1.237653542 | 0.0005551  |
| KLF15      | ENSG00000163884 | 2.77484084   | 0.00056375 |
| AC023043.1 | ENSG00000260552 | -2.793994766 | 0.00056504 |
| SLC4A4     | ENSG00000080493 | -1.009403712 | 0.00056624 |
| CCL4L2     | ENSG00000276070 | 1.10516628   | 0.00056801 |
| AC106886.2 | ENSG00000260899 | 1.6411805    | 0.00056853 |
| AUH        | ENSG00000148090 | -1.149833737 | 0.00056972 |
| SPATA32    | ENSG00000184361 | -1.840144172 | 0.00057709 |
| AC092868.1 | ENSG00000259674 | -1.814345002 | 0.00057842 |
| AC034213.1 | ENSG00000250509 | 1.13524687   | 0.00060119 |
| AOC2       | ENSG00000131480 | 1.00294883   | 0.00060193 |
| EMC3-AS1   | ENSG00000180385 | 2.36631468   | 0.00064581 |
| ZNF614     | ENSG00000142556 | 1.08714522   | 0.00065792 |
| IFNL4      | ENSG00000272395 | -2.590810972 | 0.00066012 |
| AD000671.2 | ENSG00000267120 | 2.14426609   | 0.00067101 |
| LINC01347  | ENSG00000214837 | 1.46211344   | 0.000686   |
| PURPL      | ENSG00000250337 | 1.46202251   | 0.00068616 |
| ASGR1      | ENSG00000141505 | -1.598223597 | 0.00069073 |
| HOXB-AS3   | ENSG00000233101 | -1.492972982 | 0.00070922 |
| ACKR3      | ENSG00000144476 | 1.35912546   | 0.00071875 |
| CRYM       | ENSG00000103316 | -1.048263072 | 0.00073024 |
| CYP2U1     | ENSG00000155016 | -1.206386872 | 0.00075164 |
| SYDE2      | ENSG00000097096 | 1.0166766    | 0.00075816 |
| MUC1       | ENSG00000185499 | -1.064753453 | 0.00076167 |
| TRIM46     | ENSG00000163462 | -1.053122986 | 0.00077192 |
| HBQ1       | ENSG00000086506 | -1.423280287 | 0.00078831 |
| HIST1H4C   | ENSG00000197061 | 1.40853343   | 0.00082602 |



|            |                 |             |            |
|------------|-----------------|-------------|------------|
| RASAL2-AS1 | ENSG00000224687 | 1.5380192   | 0.0008458  |
| SLCO1B7    | ENSG00000205754 | 1.01821002  | 0.00084667 |
| AC124276.1 | ENSG00000254991 | 3.19783414  | 0.00085411 |
| HIST1H2BJ  | ENSG00000124635 | 1.01530202  | 0.00085992 |
| ZNF295-AS1 | ENSG00000237232 | 2.53183729  | 0.00086074 |
| LAT2       | ENSG00000086730 | 1.06928642  | 0.00087512 |
| ACTN2      | ENSG00000077522 | 1.42001398  | 0.00088045 |
| CCDC69     | ENSG00000198624 | -1.42300570 | 0.00089315 |
| MAP1LC3B   | ENSG00000140941 | 1.34929571  | 0.00090972 |
| AC004067.1 | ENSG00000273447 | -Inf        | 0.00092609 |
| LINC01355  | ENSG00000261326 | -1.03291968 | 0.00092935 |
| PROB1      | ENSG00000228672 | -1.22819694 | 0.00093141 |
| LINC01547  | ENSG00000183250 | -1.00739498 | 0.00094269 |
| GLUD1P3    | ENSG00000250959 | 1.79927173  | 0.00094989 |
| AC004918.1 | ENSG00000244701 | -1.79008593 | 0.00096003 |
| IFITM3     | ENSG00000142089 | -1.43991459 | 0.00096073 |
| AC011247.2 | ENSG00000235586 | Inf         | 0.00097403 |
| MAPK7      | ENSG00000166484 | 1.18687214  | 0.00098097 |
| ACY3       | ENSG00000132744 | -2.19647596 | 0.00098185 |
| PRKAR2B    | ENSG00000005249 | -1.26799031 | 0.00099189 |
| AC005046.1 | ENSG00000273055 | -1.59014251 | 0.00100577 |
| RNA5-8S5   | ENSG00000277739 | 2.47748615  | 0.00100732 |
| EGLN2      | ENSG00000269858 | 1.26698468  | 0.00101151 |
| BMS1P22    | ENSG00000232775 | -1.43222596 | 0.00102769 |
| TTC39C     | ENSG00000168234 | -1.07836947 | 0.00104993 |
| DNAAF3     | ENSG00000167646 | -1.04735679 | 0.00107015 |
| AC010655.4 | ENSG00000273184 | -Inf        | 0.00107401 |
| AC025884.1 | ENSG00000258732 | 1.87313579  | 0.00108294 |
| ZNF530     | ENSG00000183647 | 1.31065251  | 0.00109563 |
| IL11RA     | ENSG00000137070 | -1.08202185 | 0.00110353 |
| BAAT       | ENSG00000136881 | -1.29703608 | 0.00115466 |
| AC145098.2 | ENSG00000279821 | 1.45535535  | 0.00116536 |
| OSER1-AS1  | ENSG00000223891 | 1.62768518  | 0.00121911 |
| PAOX       | ENSG00000148832 | -1.31767346 | 0.00125543 |
| CYGB       | ENSG00000161544 | -1.90782920 | 0.00127386 |
| AC092718.3 | ENSG00000260643 | 1.4220634   | 0.00128025 |
| FILIP1L    | ENSG00000168386 | 1.05570281  | 0.00135256 |
| LINC01942  | ENSG00000253428 | -2.80107705 | 0.00138501 |
| RARB       | ENSG00000077092 | -1.84222568 | 0.00138721 |
| HACD4      | ENSG00000188921 | -1.02289565 | 0.00142195 |
| PRPS1P2    | ENSG00000232630 | 1.44557684  | 0.00145289 |
| CCDC159    | ENSG00000183401 | -1.13300335 | 0.0015035  |
| AC090192.2 | ENSG00000253227 | 1.58412673  | 0.00152771 |
| NEURL1B    | ENSG00000214357 | -2.21044715 | 0.00153127 |
| RAB26      | ENSG00000167964 | -1.53889467 | 0.00154296 |
| RPS26P6    | ENSG00000212994 | 1.44838836  | 0.00156768 |
| CCL3       | ENSG00000277632 | 1.28362569  | 0.00157987 |
| AC008687.6 | ENSG00000269706 | 4.75814114  | 0.00161082 |
| AC009501.1 | ENSG00000231609 | -1.57931833 | 0.00161473 |
| FRMD6-AS1  | ENSG00000273888 | 1.49305825  | 0.00161475 |
| ID1        | ENSG00000125968 | -2.17092018 | 0.00162036 |
| KRT83      | ENSG00000170523 | -2.02012726 | 0.00162769 |
| P2RY1      | ENSG00000169860 | -1.05171727 | 0.00163263 |
| TBC1D3G    | ENSG00000260287 | 1.21753434  | 0.00164079 |
| AP001273.1 | ENSG00000279696 | 1.04331104  | 0.00164253 |
| AP003119.1 | ENSG00000254632 | -1.75336297 | 0.00168059 |
| CEBPA-AS1  | ENSG00000267296 | -1.31106744 | 0.00173529 |
| MNX1-AS1   | ENSG00000243479 | -1.08486839 | 0.00180646 |

|            |                 |              |            |
|------------|-----------------|--------------|------------|
| AL353625.1 | ENSG00000213073 | 1.68935853   | 0.00185465 |
| TUBAL3     | ENSG00000178462 | -1.220556036 | 0.00186655 |
| PGPEP1     | ENSG00000130517 | -2.228346048 | 0.00186818 |
| AC018628.1 | ENSG00000279133 | 1.09815884   | 0.00188785 |
| PPIAP30    | ENSG00000206448 | Inf          | 0.00192023 |
| ZNF721     | ENSG00000182903 | 1.08209513   | 0.00192478 |
| AL662899.2 | ENSG00000263020 | 1.27203076   | 0.00194546 |
| AC011466.3 | ENSG00000269534 | -3.725582607 | 0.00194755 |
| C2CD4C     | ENSG00000183186 | -2.446635029 | 0.00195096 |
| HERPUD1    | ENSG00000051108 | 1.42520751   | 0.0019695  |
| LINC00261  | ENSG00000259974 | -1.083435092 | 0.00197566 |
| CYP2T1P    | ENSG00000233622 | 1.28136428   | 0.00197719 |
| AC073957.3 | ENSG00000273151 | 1.06301294   | 0.00200342 |
| ZNF256     | ENSG00000152454 | 1.43826907   | 0.00204247 |
| H19        | ENSG00000130600 | -1.285781493 | 0.00209151 |
| ULK4P2     | ENSG00000260128 | 1.24475164   | 0.00212966 |
| AC022816.1 | ENSG00000230647 | 3.77213499   | 0.00225846 |
| RASAL2     | ENSG00000075391 | 1.83167445   | 0.00227989 |
| CFHR1      | ENSG00000244414 | -2.199339317 | 0.00229732 |
| AL139289.1 | ENSG00000229431 | 2.9560307    | 0.00233105 |
| CLPSL2     | ENSG00000196748 | -Inf         | 0.00233481 |
| RDM1       | ENSG00000278023 | -1.608083135 | 0.00234718 |
| AC005261.5 | ENSG00000279541 | 1.66265371   | 0.00237977 |
| AL122035.2 | ENSG00000272909 | -1.394402455 | 0.0023981  |
| HIST3H2BB  | ENSG00000196890 | 1.55377594   | 0.00242296 |
| AC091057.5 | ENSG00000284906 | 1.680232     | 0.00243973 |
| SERPINB3   | ENSG00000057149 | -1.638657190 | 0.00246137 |
| TDRKH-AS1  | ENSG00000203288 | 1.41168745   | 0.0024891  |
| PPP1R18    | ENSG00000146112 | 1.3576299    | 0.00260994 |
| MPST       | ENSG00000128309 | -1.481076707 | 0.00264862 |
| F2         | ENSG00000180210 | -1.312749628 | 0.00265048 |
| LINC02057  | ENSG00000249279 | 1.62185447   | 0.00265992 |
| FNDC10     | ENSG00000228594 | -1.296119663 | 0.00266219 |
| COLCA2     | ENSG00000214290 | -1.518756138 | 0.00286325 |
| IQCD       | ENSG00000166578 | -1.435005073 | 0.00287915 |
| NPIPP1     | ENSG00000188599 | 1.34493476   | 0.00289061 |
| ZBTB45P1   | ENSG00000225108 | -1.011424228 | 0.00290498 |
| FOXD3      | ENSG00000187140 | 1.32159127   | 0.00299747 |
| KRT14      | ENSG00000186847 | -1.248883284 | 0.00300255 |
| AC026368.1 | ENSG00000277840 | -2.031942987 | 0.00306593 |
| S100A9     | ENSG00000163220 | -2.359602584 | 0.00306976 |
| AP000924.1 | ENSG00000254416 | -3.748681823 | 0.00310197 |
| CPT1C      | ENSG00000169169 | -1.077871679 | 0.00315618 |
| RF00100    | ENSG00000202198 | Inf          | 0.00316672 |
| TIMD4      | ENSG00000145850 | 1.12377454   | 0.00317536 |
| AL139393.2 | ENSG00000272841 | 1.67711199   | 0.00318018 |
| HOXD11     | ENSG00000128713 | -1.958393175 | 0.00319709 |
| RIBC2      | ENSG00000128408 | -1.816484235 | 0.00322645 |
| SLC36A1    | ENSG00000123643 | -1.066437533 | 0.00326236 |
| CHST13     | ENSG00000180767 | -1.741032150 | 0.00326948 |
| AC048341.2 | ENSG00000275180 | -1.043213532 | 0.0033535  |
| CKMT1A     | ENSG00000223572 | -1.120187885 | 0.00342992 |
| TSSC4      | ENSG00000184281 | 1.07389597   | 0.00344434 |
| AL589743.6 | ENSG00000277156 | -1.100353083 | 0.00349401 |
| GAL        | ENSG00000069482 | 1.15398114   | 0.00352646 |
| CRABP2     | ENSG00000143320 | 1.05094163   | 0.00361224 |
| AL391056.1 | ENSG00000227619 | -1.006186610 | 0.00361729 |
| CATSPERZ   | ENSG00000219435 | 3.27480763   | 0.00362105 |

|            |                 |              |            |
|------------|-----------------|--------------|------------|
| PHBP5      | ENSG00000233523 | 2.28550546   | 0.00365317 |
| TM4SF19    | ENSG00000145107 | 1.27823711   | 0.00366578 |
| LINC00431  | ENSG00000225760 | 2.68300789   | 0.00368509 |
| LINC02298  | ENSG00000257556 | -1.593753778 | 0.00375695 |
| RNA5-8SN2  | ENSG00000273730 | 2.97406479   | 0.00378058 |
| AD000671.3 | ENSG00000267439 | 1.60729674   | 0.00379238 |
| TNNI3      | ENSG00000129991 | -1.587394865 | 0.00384643 |
| AC122718.1 | ENSG00000250461 | 1.05966963   | 0.00390692 |
| CCDC9B     | ENSG00000188549 | -1.883463834 | 0.0039076  |
| HRH1       | ENSG00000196639 | 1.08493851   | 0.00392866 |
| ADM5       | ENSG00000224420 | 1.30501661   | 0.00393802 |
| AC008537.3 | ENSG00000279108 | -1.208719736 | 0.00396871 |
| SPDYE2     | ENSG00000205238 | -1.406631367 | 0.00404328 |
| AL845472.2 | ENSG00000279561 | -1.395741883 | 0.00404382 |
| AP000769.1 | ENSG00000173727 | -1.033091938 | 0.00405327 |
| ZNF615     | ENSG00000197619 | 1.13764743   | 0.00409159 |
| HEY1       | ENSG00000164683 | 1.2442777    | 0.00411117 |
| C1QL3      | ENSG00000165985 | -1.186448228 | 0.00412423 |
| KCNJ2-AS1  | ENSG00000267365 | -1.829394522 | 0.00419312 |
| AC159540.2 | ENSG00000277701 | 1.41660091   | 0.00419353 |
| TMEFF1     | ENSG00000241697 | 1.97622245   | 0.00420479 |
| AC009005.1 | ENSG00000267751 | -1.292023738 | 0.00420489 |
| SEPT5      | ENSG00000184702 | 1.18293574   | 0.0042368  |
| CDV3       | ENSG00000091527 | 1.1568953    | 0.00428011 |
| LINC00858  | ENSG00000229404 | -1.680544479 | 0.00431903 |
| AC132872.1 | ENSG00000260563 | -1.117508439 | 0.00432106 |
| AC116351.2 | ENSG00000272347 | 2.46509973   | 0.00434185 |
| Z95115.1   | ENSG00000261188 | -1.106620856 | 0.00435575 |
| SNORA78    | ENSG00000273587 | 4.56834441   | 0.00447523 |
| HIST4H4    | ENSG00000197837 | 1.71079206   | 0.00449141 |
| NALT1      | ENSG00000237886 | -1.842140519 | 0.00458456 |
| TMEM75     | ENSG00000280055 | 1.76027518   | 0.00469903 |
| AC027117.1 | ENSG00000253671 | -2.331799047 | 0.00473074 |
| PIK3CD-AS2 | ENSG00000231789 | -1.201457296 | 0.00479421 |
| RAP1AP     | ENSG00000258769 | Inf          | 0.00482969 |
| ZNF830     | ENSG00000198783 | 1.19289599   | 0.00487512 |
| CDKL2      | ENSG00000138769 | 1.20718689   | 0.00490147 |
| IDH1-AS1   | ENSG00000231908 | -2.203414414 | 0.00491317 |
| SCG5       | ENSG00000166922 | 1.24673696   | 0.00493849 |
| VASH2      | ENSG00000143494 | -1.123659854 | 0.00519791 |
| MANSC1     | ENSG00000111261 | -1.905759726 | 0.00523903 |
| HIST2H3D   | ENSG00000183598 | 1.89666945   | 0.00531444 |
| TRAM1L1    | ENSG00000174599 | -1.424242172 | 0.00533    |
| AL589182.2 | ENSG00000278594 | -1.735400660 | 0.00533802 |
| GCHFR      | ENSG00000137880 | -2.850322096 | 0.00534529 |
| TTLL1      | ENSG00000100271 | -1.212624546 | 0.00534692 |
| ATP6V1B1   | ENSG00000116039 | -1.350392716 | 0.00538671 |
| ZNF264     | ENSG00000083844 | 1.40869276   | 0.00539875 |
| CTXN1      | ENSG00000178531 | -1.403793308 | 0.00543638 |
| GCNA       | ENSG00000147174 | 1.4562277    | 0.00546719 |
| MKL2       | ENSG00000186260 | -1.105589132 | 0.00547573 |
| SRRM5      | ENSG00000226763 | 1.29493272   | 0.00548452 |
| DRC3       | ENSG00000171962 | 1.1053623    | 0.00560597 |
| VAX1       | ENSG00000148704 | 1.10994894   | 0.00563256 |
| ELF3-AS1   | ENSG00000234678 | -1.038320103 | 0.00565553 |
| AC009812.1 | ENSG00000251867 | 1.78327685   | 0.00565897 |
| CNFN       | ENSG00000105427 | -1.423651533 | 0.0056979  |
| BASP1-AS1  | ENSG00000215196 | -1.496957647 | 0.00575506 |

|            |                 |              |            |
|------------|-----------------|--------------|------------|
| CXXC5      | ENSG00000171604 | -1.397189883 | 0.00576745 |
| AC026803.2 | ENSG00000267898 | 2.60791548   | 0.0058451  |
| PWP2       | ENSG00000241945 | -1.250834548 | 0.00584899 |
| AC008011.2 | ENSG00000257042 | 3.04485571   | 0.00587531 |
| AL121987.2 | ENSG00000227741 | 1.48265414   | 0.00592978 |
| HIST1H4K   | ENSG00000273542 | 1.70880271   | 0.00593455 |
| AC137936.2 | ENSG00000283511 | 1.84841932   | 0.00595272 |
| PTPRN2     | ENSG00000155093 | -1.048728802 | 0.00597751 |
| C11orf96   | ENSG00000187479 | 1.1450955    | 0.00602966 |
| PPIAP2     | ENSG00000227379 | Inf          | 0.00603724 |
| AC020915.1 | ENSG00000267216 | 1.27668903   | 0.00604704 |
| ZSCAN21    | ENSG00000166529 | 1.01610872   | 0.00609752 |
| AL161668.1 | ENSG00000178107 | -4.062853949 | 0.00613621 |
| LINC01503  | ENSG00000233901 | -1.045484154 | 0.00620799 |
| TERT       | ENSG00000164362 | -1.085261702 | 0.00625272 |
| CCL3L1     | ENSG00000276085 | 1.52833498   | 0.00631592 |
| RTN4R      | ENSG00000040608 | 1.25089738   | 0.00634274 |
| AC009269.4 | ENSG00000259744 | 2.64722253   | 0.00651157 |
| AL731569.1 | ENSG00000227896 | -1.211611723 | 0.00660707 |
| AC244230.2 | ENSG00000285402 | -2.086945564 | 0.00665134 |
| TUBB3      | ENSG00000258947 | 1.17187904   | 0.00671961 |
| ZNF138     | ENSG00000197008 | -1.196380437 | 0.00678117 |
| AC008533.1 | ENSG00000285366 | -3.470074940 | 0.00681565 |
| TSPAN12    | ENSG00000106025 | -1.450263617 | 0.00682281 |
| MARK2P8    | ENSG00000239503 | 3.33463766   | 0.00684292 |
| CCDC17     | ENSG00000159588 | 1.32515559   | 0.00689061 |
| AC072061.1 | ENSG00000259826 | 2.11198918   | 0.00689108 |
| AC016596.1 | ENSG00000227908 | 1.45239893   | 0.00709305 |
| CLDN4      | ENSG00000189143 | 1.49794311   | 0.00712863 |
| RPL4P6     | ENSG00000230071 | 1.71791693   | 0.00727461 |
| IL31RA     | ENSG00000164509 | 1.04602172   | 0.00734754 |
| SOCS2      | ENSG00000120833 | 1.70679373   | 0.00738591 |
| DFFBP1     | ENSG00000232303 | 3.05692542   | 0.00741307 |
| ACTG1P3    | ENSG00000215388 | 2.9033165    | 0.00752462 |
| AL807757.2 | ENSG00000236095 | -1.557321062 | 0.00752806 |
| AC087269.1 | ENSG00000254367 | -1.902361333 | 0.00767305 |
| VWA7       | ENSG00000204396 | -1.096038037 | 0.0078582  |
| AL080317.3 | ENSG00000272356 | 1.16570831   | 0.00792746 |
| HSP90B2P   | ENSG00000259706 | 1.46781279   | 0.00793568 |
| CXCR4      | ENSG00000121966 | -1.673057322 | 0.0080977  |
| AC073896.1 | ENSG00000144785 | -1.712882137 | 0.00820495 |
| DHFR       | ENSG00000228716 | -1.046307599 | 0.00822841 |
| AL354740.1 | ENSG00000225339 | 2.93568466   | 0.00829122 |
| GDPD1      | ENSG00000153982 | -1.044715768 | 0.00842944 |
| TCN1       | ENSG00000134827 | -2.094253967 | 0.00850022 |
| CHD2       | ENSG00000173575 | 1.03156194   | 0.00859048 |
| AL121772.3 | ENSG00000276952 | -1.141061687 | 0.00875373 |
| AC108073.2 | ENSG00000241011 | 3.09609908   | 0.00887858 |
| BST2       | ENSG00000130303 | -2.164517122 | 0.00889441 |
| LAGE3P1    | ENSG00000225693 | -2.295830144 | 0.00889927 |
| TEN1       | ENSG00000257949 | 1.8536527    | 0.0089446  |
| SRP14-AS1  | ENSG00000248508 | -1.089572837 | 0.00907853 |
| AC004471.1 | ENSG00000223461 | 2.47650752   | 0.00910262 |
| SPATA20P1  | ENSG00000231123 | -Inf         | 0.00933074 |
| CYP4F3     | ENSG00000186529 | -1.861301557 | 0.00953482 |
| SNAI2      | ENSG00000019549 | 2.17150644   | 0.00965394 |
| FAM229B    | ENSG00000203778 | -1.299326154 | 0.00967422 |
| AP003392.4 | ENSG00000255121 | -1.396098974 | 0.00976549 |

|            |                 |              |            |
|------------|-----------------|--------------|------------|
| EGFL8      | ENSG00000241404 | -1.499869037 | 0.00997268 |
| SPEF1      | ENSG00000101222 | 1.8211986    | 0.01030573 |
| AC069224.1 | ENSG00000260572 | 2.10151734   | 0.01051159 |
| AC005393.1 | ENSG00000276445 | 1.47998979   | 0.01082006 |
| ARNTL2     | ENSG00000029153 | 1.93834237   | 0.01088329 |
| GSDMB      | ENSG00000073605 | -1.020802978 | 0.01111139 |
| FTLP14     | ENSG00000260459 | -3.21903078  | 0.01124836 |
| NSFP1      | ENSG00000260075 | -Inf         | 0.01155292 |
| B3GNT5     | ENSG00000176597 | 1.52199472   | 0.01161734 |
| FOXO3B     | ENSG00000240445 | 1.19774793   | 0.01164002 |
| AL358113.1 | ENSG00000285130 | -1.039896722 | 0.01169616 |
| TSN        | ENSG00000211460 | -1.305046327 | 0.01190404 |
| AC012181.1 | ENSG00000261114 | 1.69646913   | 0.01213964 |
| PDE9A      | ENSG00000160191 | -1.23189335  | 0.01214468 |
| AC244197.3 | ENSG00000241489 | -1.196371823 | 0.01215452 |
| AC069544.1 | ENSG00000272853 | -1.468785617 | 0.01215847 |
| HTR7P1     | ENSG00000183935 | -1.071826816 | 0.01224439 |
| FAM35BP    | ENSG00000165874 | -1.60994441  | 0.01234812 |
| AC021242.3 | ENSG00000272267 | 1.65397105   | 0.01235074 |
| RPS7P3     | ENSG00000231940 | 2.64090717   | 0.0127183  |
| RPL29P14   | ENSG00000241112 | 4.2924962    | 0.01283576 |
| AC092153.1 | ENSG00000285155 | -1.360312762 | 0.01298669 |
| TSKU       | ENSG00000182704 | -1.142878469 | 0.0131096  |
| GDPD3      | ENSG00000102886 | 1.64643763   | 0.01396609 |
| ZNF461     | ENSG00000197808 | 1.74229184   | 0.01396758 |
| AC026464.3 | ENSG00000260371 | -4.068431693 | 0.01406764 |
| GAPLINC    | ENSG00000266835 | -2.203317745 | 0.01419526 |
| AC007731.5 | ENSG00000277971 | 1.49370025   | 0.0143874  |
| RPL22P24   | ENSG00000231084 | 1.82667863   | 0.01450668 |
| NIPSNAP3B  | ENSG00000165028 | -1.287077886 | 0.01466515 |
| AL606534.5 | ENSG00000253326 | 1.22479385   | 0.01476442 |
| MAP2K6     | ENSG00000108984 | -3.08788984  | 0.01501292 |
| PFN2       | ENSG00000070087 | -1.076146590 | 0.01505029 |
| AC087385.1 | ENSG00000240163 | 1.40446145   | 0.01507388 |
| AL138759.1 | ENSG00000244332 | -1.076275073 | 0.01511402 |
| AC005154.3 | ENSG00000244480 | -2.438147300 | 0.01521608 |
| CX3CL1     | ENSG00000006210 | -1.828655582 | 0.01530774 |
| GPATCH2L   | ENSG00000089916 | 1.22750838   | 0.01543521 |
| AC011450.1 | ENSG00000197813 | -2.282783234 | 0.01565285 |
| AC120114.1 | ENSG00000247735 | -1.298119940 | 0.01588365 |
| AKR7A2P1   | ENSG00000229020 | 2.47520686   | 0.01589265 |
| AP001437.1 | ENSG00000273210 | 3.59388757   | 0.01604888 |
| SNHG9      | ENSG00000255198 | 1.70829363   | 0.01607833 |
| ROCK1P1    | ENSG00000263006 | 1.10202369   | 0.01636782 |
| AC108463.3 | ENSG00000271590 | 1.90021069   | 0.01653999 |
| ETV5-AS1   | ENSG00000234197 | 3.57160334   | 0.0166479  |
| INSIG1     | ENSG00000186480 | 1.40761668   | 0.01664874 |
| CYS1       | ENSG00000205795 | -1.089628473 | 0.01666268 |
| AC010271.1 | ENSG00000268366 | 1.46350109   | 0.01673258 |
| SLC19A2    | ENSG00000117479 | 1.28129429   | 0.01685912 |
| AC092803.2 | ENSG00000260805 | 1.57699291   | 0.01719059 |
| AL391825.1 | ENSG00000229808 | 1.68576425   | 0.01764241 |
| BMS1P7     | ENSG00000270025 | 2.01421995   | 0.01767193 |
| YWHABP2    | ENSG00000256464 | 2.55651557   | 0.01781584 |
| NCCRP1     | ENSG00000188505 | -1.268077637 | 0.01785382 |
| KRTAP5-1   | ENSG00000205869 | 2.28432308   | 0.01801179 |
| RPL13AP20  | ENSG00000234498 | 1.14285951   | 0.01831132 |
| AC055811.3 | ENSG00000266498 | 2.94120037   | 0.01860298 |

|            |                 |              |            |
|------------|-----------------|--------------|------------|
| ZNF195     | ENSG00000005801 | 1.12727926   | 0.01867851 |
| AL359183.1 | ENSG00000279406 | -1.508099365 | 0.01871332 |
| ZNF223     | ENSG00000178386 | 1.19552927   | 0.01896553 |
| TUBA4B     | ENSG00000243910 | -1.873011423 | 0.01955439 |
| RPS10-NUDT | ENSG00000270800 | 4.58544496   | 0.01967091 |
| CARD8-AS1  | ENSG00000268001 | 1.46772819   | 0.01977955 |
| AC008429.1 | ENSG00000204758 | 1.00795092   | 0.01996668 |
| AP005136.2 | ENSG00000266783 | 2.31267462   | 0.02002032 |
| AC098487.1 | ENSG00000248161 | -1.318154495 | 0.02012807 |
| LINC01843  | ENSG00000251169 | -1.035611572 | 0.02024813 |
| LRRC8D     | ENSG00000171492 | -1.192896305 | 0.0203042  |
| AL445183.3 | ENSG00000236360 | 1.15830583   | 0.02075717 |
| LRRC29     | ENSG00000125122 | -1.144239055 | 0.02084098 |
| AL139260.1 | ENSG00000228436 | 2.11400193   | 0.02089652 |
| CR392039.3 | ENSG00000279501 | 1.71110314   | 0.02091946 |
| AP001574.1 | ENSG00000253217 | -2.141070634 | 0.0209671  |
| AL157935.1 | ENSG00000227218 | 2.12035595   | 0.02122161 |
| MIR34AHG   | ENSG00000228526 | 4.62268396   | 0.02122923 |
| RCN3       | ENSG00000142552 | -1.320489556 | 0.02127134 |
| AL021578.1 | ENSG00000275894 | 1.65508265   | 0.02139521 |
| ZBTB49     | ENSG00000168826 | 1.23344529   | 0.02140101 |
| NEURL2     | ENSG00000124257 | -1.237847098 | 0.02160691 |
| AL445647.1 | ENSG00000272046 | -1.028285410 | 0.02199911 |
| PSCA       | ENSG00000167653 | 1.27294026   | 0.02208513 |
| RAB31      | ENSG00000168461 | -1.151599479 | 0.02209574 |
| AL356056.2 | ENSG00000231187 | -1.409051034 | 0.0221342  |
| AL139424.2 | ENSG00000284642 | -1.829925087 | 0.02244123 |
| AC004057.1 | ENSG00000196656 | 1.29033017   | 0.0224904  |
| AL138885.3 | ENSG00000285278 | 1.26430593   | 0.02262489 |
| ZNF641     | ENSG00000167528 | 1.73206161   | 0.02279261 |
| SEMA3F-AS1 | ENSG00000235016 | 1.08858415   | 0.02294237 |
| AC092651.2 | ENSG00000266931 | 1.23133314   | 0.02308794 |
| AL445931.1 | ENSG00000235138 | -1.449062605 | 0.02393889 |
| KRT18P7    | ENSG00000258951 | 2.03419163   | 0.02398025 |
| BCL2L2     | ENSG00000129473 | 2.10134403   | 0.02430837 |
| KCNS3      | ENSG00000170745 | 1.19469569   | 0.02440807 |
| AGMO       | ENSG00000187546 | -1.366048622 | 0.0246899  |
| AC109446.3 | ENSG00000261448 | -1.157334696 | 0.02504738 |
| CLDN12     | ENSG00000157224 | 1.00226416   | 0.02511726 |
| STMN1P1    | ENSG00000276058 | 2.38954086   | 0.02524759 |
| AC011676.5 | ENSG00000280035 | -1.299350119 | 0.02533823 |
| AC096921.2 | ENSG00000261468 | -1.800624897 | 0.02534169 |
| AC008608.2 | ENSG00000271737 | -1.399778105 | 0.02548182 |
| AC137834.2 | ENSG00000276727 | 2.50290012   | 0.02553479 |
| KPNA7      | ENSG00000185467 | 1.70433672   | 0.02558657 |
| AC141586.2 | ENSG00000260176 | 1.16931172   | 0.02575066 |
| AC026785.3 | ENSG00000249199 | -2.091780824 | 0.02586332 |
| SETSIP     | ENSG00000230667 | 1.33047388   | 0.02615526 |
| AL137003.1 | ENSG00000229931 | 1.35506188   | 0.0263447  |
| CR769767.2 | ENSG00000276692 | 1.12678616   | 0.02639106 |
| RPS15AP36  | ENSG00000213013 | Inf          | 0.02657416 |
| TREX2      | ENSG00000183479 | -1.205970412 | 0.02664916 |
| HIPK4      | ENSG00000160396 | -1.322902050 | 0.02728453 |
| ANXA2R     | ENSG00000177721 | -1.010230400 | 0.02732868 |
| LINC01220  | ENSG00000259687 | -2.489365664 | 0.02759776 |
| TRIB3      | ENSG00000101255 | 1.19427173   | 0.02782643 |
| AL591684.2 | ENSG00000254929 | 1.13559837   | 0.027849   |
| LDHD       | ENSG00000166816 | -1.029577306 | 0.0285874  |

|            |                 |              |            |
|------------|-----------------|--------------|------------|
| AL139246.5 | ENSG00000272449 | -1.286850287 | 0.02876577 |
| AC018695.6 | ENSG00000275393 | -2.991690864 | 0.02890545 |
| RNF2P1     | ENSG00000231381 | -1.797349995 | 0.02902257 |
| LCE3D      | ENSG00000163202 | 2.17677961   | 0.02906766 |
| AL049629.2 | ENSG00000284969 | 1.27483654   | 0.02910265 |
| AC135050.2 | ENSG00000255439 | Inf          | 0.029222   |
| A4GNT      | ENSG00000118017 | -1.302917656 | 0.02924711 |
| AL160269.1 | ENSG00000285269 | 1.70521071   | 0.02955752 |
| AP000695.2 | ENSG00000233818 | 1.29271331   | 0.03044739 |
| AC079949.2 | ENSG00000278266 | -1.038710218 | 0.03051282 |
| AC125437.1 | ENSG00000267655 | 1.67952382   | 0.03070739 |
| LENG8-AS1  | ENSG00000226696 | -1.211019157 | 0.03071217 |
| AC006273.1 | ENSG00000272473 | -1.445696696 | 0.03117688 |
| C3orf52    | ENSG00000114529 | 1.37266519   | 0.03123346 |
| ZNF181     | ENSG00000197841 | 1.09142301   | 0.03136375 |
| TREX1      | ENSG00000213689 | -1.354826896 | 0.03138637 |
| IPO9-AS1   | ENSG00000231871 | -1.824032917 | 0.03174771 |
| SNORA28    | ENSG00000272533 | 2.7433767    | 0.03222404 |
| AC108134.2 | ENSG00000261889 | 1.84842747   | 0.03237096 |
| AL353801.3 | ENSG00000273363 | -3.534101087 | 0.03259737 |
| FLVCR1-AS1 | ENSG00000198468 | -1.013174297 | 0.0326264  |
| LIMS1      | ENSG00000169756 | 1.20299902   | 0.03388206 |
| MAST4-AS1  | ENSG00000229666 | -1.808528587 | 0.03390168 |
| VGFB       | ENSG00000128564 | 1.24561573   | 0.03394944 |
| AC080188.2 | ENSG00000279384 | 2.1921836    | 0.03414353 |
| AC007161.3 | ENSG00000283549 | Inf          | 0.03417959 |
| MMP10      | ENSG00000166670 | 1.88751179   | 0.03504043 |
| FRMD8      | ENSG00000126391 | -1.093029156 | 0.03634849 |
| LINC01474  | ENSG00000236849 | -1.702942618 | 0.03653957 |
| PGAM1P8    | ENSG00000255200 | -2.102853496 | 0.03756949 |
| RFPL4A     | ENSG00000223638 | 1.83227324   | 0.03778359 |
| AC053513.1 | ENSG00000256973 | -2.184759217 | 0.03787581 |
| AC000093.1 | ENSG00000284874 | -2.142809325 | 0.03818545 |
| AP001363.1 | ENSG00000250659 | Inf          | 0.03912027 |
| AC079203.1 | ENSG00000243094 | 2.94861974   | 0.03950531 |
| AC013444.2 | ENSG00000270390 | -1.331837362 | 0.03975776 |
| AC139149.1 | ENSG00000229848 | -1.230681167 | 0.03975942 |
| COX20P1    | ENSG00000213025 | 3.97224858   | 0.04009801 |
| AC015971.1 | ENSG00000228363 | 1.07612768   | 0.04037224 |
| AP003119.2 | ENSG00000255100 | -1.514967764 | 0.04059897 |
| C16orf46   | ENSG00000166455 | 1.12505423   | 0.04100973 |
| TACC1      | ENSG00000147526 | -1.183647969 | 0.04121469 |
| AL713922.2 | ENSG00000276662 | 2.74123723   | 0.04121587 |
| PCBP2-OT1  | ENSG00000282977 | 1.89234407   | 0.04170505 |
| PPIAP54    | ENSG00000264655 | -2.682180585 | 0.0423599  |
| AC107959.1 | ENSG00000245025 | 1.07458727   | 0.0427463  |
| AC092117.2 | ENSG00000279901 | 1.38163602   | 0.04283202 |
| DEFB1      | ENSG00000164825 | -1.497087312 | 0.04335303 |
| AC025423.1 | ENSG00000256325 | 2.18568339   | 0.04341308 |
| AL132780.5 | ENSG00000280129 | -1.477134016 | 0.04362257 |
| AC092120.1 | ENSG00000261692 | 3.49585971   | 0.04363823 |
| AC067931.1 | ENSG00000279766 | 1.53397417   | 0.04364826 |
| AC091133.4 | ENSG00000251550 | 1.03935327   | 0.04411322 |
| AC008895.1 | ENSG00000279948 | 1.08595918   | 0.04440167 |
| LINC02154  | ENSG00000235385 | 2.86170011   | 0.0449321  |
| NPIP3      | ENSG00000169246 | 1.04379052   | 0.04511112 |
| AC012467.1 | ENSG00000271916 | -4.205101085 | 0.04512815 |
| HRASLS2    | ENSG00000133328 | -1.933584659 | 0.04557629 |

|            |                 |              |            |
|------------|-----------------|--------------|------------|
| RF00017    | ENSG00000280502 | -3.773117362 | 0.04559073 |
| AC002467.1 | ENSG00000241764 | 1.13413571   | 0.04571544 |
| UBE2V1P1   | ENSG00000226632 | 2.1569545    | 0.04609298 |
| AC131009.4 | ENSG00000279283 | 1.05702564   | 0.04705801 |
| ZNF518A    | ENSG00000177853 | 1.26341954   | 0.04734197 |
| AL121832.3 | ENSG00000275437 | 1.11102838   | 0.04747626 |
| AP002990.1 | ENSG00000255508 | 3.06437049   | 0.04749879 |
| IFNL3P1    | ENSG00000268510 | -1.092692808 | 0.04751869 |
| AC243964.2 | ENSG00000266903 | -1.924819728 | 0.04756019 |
| AQP11      | ENSG00000178301 | -1.095353719 | 0.04763704 |
| CTAGE7P    | ENSG00000233122 | -1.210194474 | 0.048235   |
| AL359643.3 | ENSG00000272142 | -1.239770816 | 0.04836272 |
| AC084880.1 | ENSG00000213144 | 1.14795246   | 0.04858296 |
| TMOD1      | ENSG00000136842 | 1.00520279   | 0.04981848 |
| MIR210HG   | ENSG00000247095 | -1.603156679 | 0.04986964 |

---



**RNA-seq differentially genes (LINC01977-ASO vs Scramble)**

| <b>Symbol</b> | <b>Ensembl</b>  | <b>logFC</b> | <b>P value</b> |
|---------------|-----------------|--------------|----------------|
| CXCL1         | ENSG00000163739 | -3.464287166 | 1.152E-179     |
| TM4SF20       | ENSG00000168955 | -3.392006299 | 8.911E-172     |
| MUC5B         | ENSG00000117983 | -3.313487319 | 1.941E-162     |
| STC2          | ENSG00000113739 | 2.57539302   | 3.4835E-95     |
| CDH1          | ENSG00000039068 | -2.424460139 | 5.7524E-93     |
| PDK4          | ENSG00000004799 | -2.487610167 | 4.0583E-90     |
| MEGF9         | ENSG00000106780 | -2.318407467 | 5.1098E-90     |
| NEB           | ENSG00000183091 | -3.613709922 | 4.8287E-75     |
| SPDEF         | ENSG00000124664 | -3.346754866 | 2.9155E-70     |
| ERBB3         | ENSG00000065361 | -2.865636175 | 8.4286E-70     |
| CHAC1         | ENSG00000128965 | 3.38052255   | 7.1371E-69     |
| HNF4A         | ENSG00000101076 | -2.587317433 | 3.8973E-68     |
| FOSL1         | ENSG00000175592 | 2.2136803    | 2.551E-67      |
| SAMD11        | ENSG00000187634 | -2.834132598 | 3.2188E-67     |
| MUC5AC        | ENSG00000215182 | -1.858170377 | 3.2195E-66     |
| CP            | ENSG00000047457 | -1.935240769 | 1.9139E-64     |
| DHCR24        | ENSG00000116133 | -1.918984249 | 1.7292E-63     |
| SLC12A2       | ENSG00000064651 | -2.007562276 | 6.7174E-63     |
| UBE2F-SCLY    | ENSG00000258984 | -6.153017766 | 8.982E-62      |
| CFH           | ENSG00000000971 | -2.148569230 | 1.8898E-61     |
| FCGBP         | ENSG00000275395 | -1.885873038 | 3.1205E-61     |
| PTGES         | ENSG00000148344 | -1.944291219 | 2.4161E-58     |
| GJA1          | ENSG00000152661 | -1.985767307 | 1.0778E-57     |
| TUBB3         | ENSG00000258947 | 2.16937078   | 1.7683E-57     |
| NOTCH3        | ENSG00000074181 | -1.774448924 | 2.4452E-57     |
| MTUS1         | ENSG00000129422 | -1.752443095 | 2.3634E-55     |
| SMOC1         | ENSG00000198732 | -1.942045549 | 2.5058E-53     |
| OSGIN1        | ENSG00000140961 | 1.94721799   | 4.8085E-53     |
| RHOV          | ENSG00000104140 | -2.680762899 | 7.9979E-53     |
| TMOD3         | ENSG00000138594 | -1.668016438 | 1.252E-51      |
| LAMC2         | ENSG00000058085 | 1.79340501   | 1.4119E-51     |
| TM4SF4        | ENSG00000169903 | -1.713960780 | 3.0661E-51     |
| CXCL3         | ENSG00000163734 | -2.051770234 | 5.791E-51      |
| THRA          | ENSG00000126351 | -1.945976473 | 1.651E-50      |
| TIPARP        | ENSG00000163659 | 1.79673353   | 4.1764E-50     |
| CORO2A        | ENSG00000106789 | -2.706899613 | 5.9666E-49     |
| SLC7A7        | ENSG00000155465 | -1.792790967 | 2.0177E-47     |
| GPX2          | ENSG00000176153 | -1.694937760 | 3.4836E-47     |
| NUDT15        | ENSG00000136159 | -2.273827337 | 7.6145E-47     |
| THSD7A        | ENSG00000005108 | -1.890538344 | 9.5826E-47     |
| HR            | ENSG00000168453 | -1.694772267 | 1.9703E-45     |
| TNFRSF12A     | ENSG00000006327 | 1.66662647   | 4.4042E-45     |
| SLC23A2       | ENSG00000089057 | -1.562857699 | 6.8067E-45     |
| ETS1          | ENSG00000134954 | 1.68816787   | 1.9413E-44     |
| USH1C         | ENSG00000006611 | -3.276817546 | 5.2627E-43     |
| STK40         | ENSG00000196182 | 1.94610832   | 8.3136E-43     |
| NTS           | ENSG00000133636 | -1.719466947 | 9.4198E-43     |
| SESN2         | ENSG00000130766 | 1.796299     | 1.219E-42      |
| MMGT1         | ENSG00000169446 | -1.840091098 | 4.423E-42      |
| ARHGAP18      | ENSG00000146376 | -1.988088382 | 6.0858E-42     |
| SH3PXD2A      | ENSG00000107957 | -1.929733769 | 1.1822E-41     |
| CBX5          | ENSG00000094916 | -1.516559267 | 1.2443E-41     |
| TRIB3         | ENSG00000101255 | 1.62924989   | 6.1738E-41     |
| VGLL3         | ENSG00000206538 | -2.952392522 | 7.9774E-41     |
| RASSF9        | ENSG00000198774 | -2.355598497 | 1.0178E-40     |
| ABCG1         | ENSG00000160179 | -2.129352852 | 1.6902E-40     |

|          |                 |              |            |
|----------|-----------------|--------------|------------|
| DIXDC1   | ENSG00000150764 | -2.688155389 | 1.8257E-40 |
| HSPA1B   | ENSG00000204388 | -1.469788069 | 4.0693E-40 |
| TSC22D3  | ENSG00000157514 | 2.06625375   | 7.0003E-40 |
| HGD      | ENSG00000113924 | -2.597801297 | 1.3366E-39 |
| FN1      | ENSG00000115414 | -1.469799203 | 1.6161E-39 |
| SFN      | ENSG00000175793 | 1.54464388   | 3.1857E-39 |
| ANKS4B   | ENSG00000175311 | -3.270188879 | 6.4726E-39 |
| C3       | ENSG00000125730 | -1.505767500 | 1.6609E-38 |
| SLC23A1  | ENSG00000170482 | -2.231136427 | 1.9998E-38 |
| ODC1     | ENSG00000115758 | 1.50770651   | 2.0525E-38 |
| ANXA13   | ENSG00000104537 | -2.319702054 | 2.6635E-38 |
| NAV3     | ENSG00000067798 | 1.81202598   | 2.758E-38  |
| BRI3BP   | ENSG00000184992 | -1.523477529 | 3.1884E-38 |
| SYNM     | ENSG00000182253 | -1.552642919 | 7.0369E-38 |
| SMURF2   | ENSG00000108854 | 1.61081489   | 1.2488E-37 |
| KAT6A    | ENSG00000083168 | -1.614113452 | 1.3671E-37 |
| SERPINE1 | ENSG00000106366 | 1.46971158   | 1.4829E-37 |
| HMGA2    | ENSG00000149948 | 1.61627751   | 2.4499E-37 |
| LANCL1   | ENSG00000115365 | -1.493179286 | 2.6566E-37 |
| RAB8B    | ENSG00000166128 | -1.746897602 | 5.8796E-37 |
| CDH17    | ENSG00000079112 | -1.668845946 | 6.2389E-37 |
| SLC39A10 | ENSG00000196950 | -1.546834217 | 1.246E-36  |
| EPS8     | ENSG00000151491 | -1.468366377 | 1.2937E-36 |
| TTC39B   | ENSG00000155158 | -1.901928692 | 2.572E-36  |
| TCIM     | ENSG00000176907 | -1.607513354 | 2.8916E-36 |
| PDLIM5   | ENSG00000163110 | -1.448038288 | 4.0797E-36 |
| TJP3     | ENSG00000105289 | -3.056372606 | 4.7818E-36 |
| FGFR3    | ENSG00000068078 | -2.757853726 | 5.4947E-36 |
| SUCNR1   | ENSG00000198829 | -2.993085877 | 6.2739E-36 |
| PPIF     | ENSG00000108179 | 1.51943216   | 2.0126E-35 |
| THRB     | ENSG00000151090 | -2.232298876 | 2.6258E-35 |
| MARCH4   | ENSG00000144583 | 1.62425148   | 3.3018E-35 |
| GREM1    | ENSG00000166923 | 2.11051725   | 4.0776E-35 |
| ICMT     | ENSG00000116237 | -1.520651323 | 8.4237E-35 |
| VCAN     | ENSG00000038427 | -1.478344139 | 1.0685E-34 |
| HSPA1A   | ENSG00000204389 | -1.353394430 | 1.4332E-34 |
| C5       | ENSG00000106804 | -1.670987707 | 3.0381E-34 |
| SORL1    | ENSG00000137642 | -1.875816329 | 3.6929E-34 |
| ANXA4    | ENSG00000196975 | -1.335584378 | 7.3858E-34 |
| CBFB     | ENSG00000067955 | -1.811333264 | 8.5289E-34 |
| ZC3H12A  | ENSG00000163874 | -1.355576009 | 9.3455E-34 |
| PTPRU    | ENSG00000060656 | -1.650341133 | 1.5448E-33 |
| EGR1     | ENSG00000120738 | 1.73084859   | 1.6669E-33 |
| DOK4     | ENSG00000125170 | -1.520855149 | 1.907E-33  |
| ADSSL1   | ENSG00000185100 | -2.673463329 | 2.1707E-33 |
| PLEK2    | ENSG00000100558 | 2.00472435   | 2.5749E-33 |
| SNAP25   | ENSG00000132639 | -1.528857263 | 2.8212E-33 |
| SLC45A4  | ENSG00000022567 | -1.362964330 | 3.1032E-33 |
| RCOR1    | ENSG00000089902 | -1.438239178 | 3.9946E-33 |
| CDKN2C   | ENSG00000123080 | -1.916067408 | 4.7352E-33 |
| ALDH1A1  | ENSG00000165092 | -1.270420572 | 1.1578E-32 |
| MTHFD2   | ENSG00000065911 | 1.39175046   | 1.1821E-32 |
| LUCAT1   | ENSG00000248323 | 1.79407773   | 3.3875E-32 |
| TGFBR1   | ENSG00000106799 | -1.407868636 | 3.7525E-32 |
| CIDEC    | ENSG00000187288 | -3.502675799 | 6.1205E-32 |
| HEXIM1   | ENSG00000186834 | -1.322695994 | 6.8118E-32 |
| SEMA4G   | ENSG00000095539 | -1.776589079 | 2.7921E-31 |
| VMA21    | ENSG00000160131 | -1.453385637 | 3.435E-31  |

|            |                 |              |            |
|------------|-----------------|--------------|------------|
| PLD5       | ENSG00000180287 | -2.152852319 | 3.4943E-31 |
| GPRIN3     | ENSG00000185477 | -1.299451732 | 5.5638E-31 |
| ULK1       | ENSG00000177169 | 1.36276013   | 6.4752E-31 |
| KIF21B     | ENSG00000116852 | -1.445889643 | 8.9032E-31 |
| ADSS       | ENSG00000035687 | -1.36390575  | 1.1043E-30 |
| ASS1       | ENSG00000130707 | -1.491403510 | 1.3326E-30 |
| CELSR2     | ENSG00000143126 | -1.55560066  | 1.7807E-30 |
| SPTSSA     | ENSG00000165389 | -1.335142805 | 1.9516E-30 |
| KIAA1551   | ENSG00000174718 | 1.59186165   | 2.2202E-30 |
| SLC40A1    | ENSG00000138449 | -1.942047646 | 2.4775E-30 |
| JUP        | ENSG00000173801 | -1.260196897 | 2.591E-30  |
| HSPA5      | ENSG00000044574 | 1.2944362    | 3.127E-30  |
| FMN1       | ENSG00000248905 | -1.56553188  | 4.5421E-30 |
| ALOXE3     | ENSG00000179148 | 2.95706474   | 4.9899E-30 |
| ITGAV      | ENSG00000138448 | -1.246777842 | 6.105E-30  |
| FRMD6      | ENSG00000139926 | 1.6765015    | 7.71E-30   |
| PLA2G12A   | ENSG00000123739 | -1.991607953 | 8.5292E-30 |
| MYOCD      | ENSG00000141052 | -1.760675474 | 1.0079E-29 |
| OAS1       | ENSG00000089127 | -1.483928890 | 1.31E-29   |
| EPS8L3     | ENSG00000198758 | -3.001573307 | 1.9762E-29 |
| GLS        | ENSG00000115419 | 1.31539049   | 2.0909E-29 |
| STX6       | ENSG00000135823 | -1.547615736 | 2.1997E-29 |
| AP1S3      | ENSG00000152056 | -1.595866116 | 3.0873E-29 |
| SDK2       | ENSG00000069188 | -2.220976672 | 3.2441E-29 |
| TRIML2     | ENSG00000179046 | 1.42612143   | 3.2596E-29 |
| AP3M1      | ENSG00000185009 | -1.344420872 | 5.3754E-29 |
| B4GALT5    | ENSG00000158470 | -1.264882919 | 5.8532E-29 |
| APH1B      | ENSG00000138613 | -1.632507944 | 8.352E-29  |
| ALDH3A2    | ENSG00000072210 | -1.292778682 | 1.0688E-28 |
| LY6K       | ENSG00000160886 | 2.99814901   | 1.3596E-28 |
| F5         | ENSG00000198734 | -1.800904213 | 1.3946E-28 |
| CDON       | ENSG00000064309 | -2.170243087 | 1.4414E-28 |
| BCL2L11    | ENSG00000153094 | -1.578275642 | 2.5129E-28 |
| HK2        | ENSG00000159399 | 2.52073274   | 3.0015E-28 |
| HERC5      | ENSG00000138646 | -1.28018826  | 3.8169E-28 |
| SLC51B     | ENSG00000186198 | -2.930902710 | 4.1485E-28 |
| CPS1       | ENSG00000021826 | -1.219002726 | 4.231E-28  |
| SLPI       | ENSG00000124107 | -1.80712654  | 4.4021E-28 |
| VAV3       | ENSG00000134215 | -1.94346464  | 4.7924E-28 |
| NEDD4      | ENSG00000069869 | 1.26225128   | 6.0207E-28 |
| STARD7     | ENSG00000084090 | -1.254981427 | 1.0828E-27 |
| OLFML2A    | ENSG00000185585 | -1.589238014 | 1.7702E-27 |
| RNASE4     | ENSG00000258818 | -1.510589828 | 1.9515E-27 |
| EHF        | ENSG00000135373 | -1.872778552 | 2.1436E-27 |
| AC005077.4 | ENSG00000230882 | 1.51913931   | 2.7501E-27 |
| KLF6       | ENSG00000067082 | 1.56497439   | 3.9382E-27 |
| FGB        | ENSG00000171564 | -2.326842897 | 5.9431E-27 |
| TSC22D2    | ENSG00000196428 | 1.38823083   | 1.4383E-26 |
| CD38       | ENSG00000004468 | -1.307160470 | 2.2046E-26 |
| ADCY9      | ENSG00000162104 | -1.380676227 | 6.9857E-26 |
| IGFBP1     | ENSG00000146678 | 1.26840663   | 8.1393E-26 |
| HACD3      | ENSG00000074696 | -1.170743473 | 8.7818E-26 |
| PLPP3      | ENSG00000162407 | 1.37353081   | 8.9612E-26 |
| FGFR4      | ENSG00000160867 | -1.325187324 | 1.002E-25  |
| FAM57A     | ENSG00000167695 | 1.55069017   | 1.0596E-25 |
| F2RL1      | ENSG00000164251 | 1.24835832   | 1.1824E-25 |
| SOX9       | ENSG00000125398 | -1.45225902  | 1.4057E-25 |
| HLA-DMB    | ENSG00000242574 | -3.67075379  | 1.5126E-25 |

|            |                 |              |            |
|------------|-----------------|--------------|------------|
| NTRK3      | ENSG00000140538 | -2.064781842 | 1.6837E-25 |
| CAMLG      | ENSG00000164615 | -1.51545947  | 1.9213E-25 |
| MMD        | ENSG00000108960 | -1.321984237 | 1.9591E-25 |
| RASAL2     | ENSG00000075391 | 1.52151323   | 1.9889E-25 |
| EVA1C      | ENSG00000166979 | -1.546492178 | 4.4571E-25 |
| KRT18      | ENSG00000111057 | -1.112295779 | 4.592E-25  |
| DPY19L1    | ENSG00000173852 | -1.151841802 | 4.6759E-25 |
| TNS1       | ENSG00000079308 | -1.662744279 | 5.46E-25   |
| KLHL21     | ENSG00000162413 | 1.32522239   | 6.209E-25  |
| GALNT4     | ENSG00000257594 | -1.278759654 | 7.9126E-25 |
| PLCH1      | ENSG00000114805 | -1.694920769 | 1.1182E-24 |
| CHSY1      | ENSG00000131873 | -1.419595330 | 1.5884E-24 |
| ASNS       | ENSG00000070669 | 1.27040482   | 1.9438E-24 |
| HAS2       | ENSG00000170961 | 1.66027479   | 2.3083E-24 |
| CYP24A1    | ENSG00000019186 | -1.097914344 | 2.3563E-24 |
| SMIM14     | ENSG00000163683 | -1.280289445 | 2.6397E-24 |
| ADGRB2     | ENSG00000121753 | -1.698700484 | 3.3103E-24 |
| MYORG      | ENSG00000164976 | -1.336155052 | 5.7951E-24 |
| GADD45A    | ENSG00000116717 | 1.36847997   | 9.4027E-24 |
| S100P      | ENSG00000163993 | -1.373101622 | 1.0787E-23 |
| LINC00473  | ENSG00000223414 | -1.398954649 | 1.5416E-23 |
| AL163636.2 | ENSG00000259171 | -3.097942054 | 1.9494E-23 |
| SLC17A3    | ENSG00000124564 | -2.710209829 | 2.1469E-23 |
| CAMK2N1    | ENSG00000162545 | -1.321660957 | 2.3733E-23 |
| PIK3AP1    | ENSG00000155629 | -1.897999589 | 2.9311E-23 |
| VIL1       | ENSG00000127831 | -4.892961586 | 3.8991E-23 |
| IL1RL1     | ENSG00000115602 | 4.9225945    | 4.0708E-23 |
| SLC22A18   | ENSG00000110628 | -1.354601319 | 5.4633E-23 |
| SLITRK5    | ENSG00000165300 | -2.192930173 | 5.9766E-23 |
| RHNO1      | ENSG00000171792 | -1.431063478 | 6.3032E-23 |
| ISG20L2    | ENSG00000143319 | 1.30513176   | 6.7253E-23 |
| JUN        | ENSG00000177606 | 1.14080752   | 8.0097E-23 |
| SORT1      | ENSG00000134243 | -1.523227050 | 8.3968E-23 |
| THOP1      | ENSG00000172009 | -1.30988614  | 9.2454E-23 |
| AP000439.2 | ENSG00000255774 | -2.184187766 | 1.7295E-22 |
| KCNJ16     | ENSG00000153822 | -2.422682618 | 1.8114E-22 |
| SNPH       | ENSG00000101298 | -1.422607777 | 2.3962E-22 |
| PCSK9      | ENSG00000169174 | -1.220014363 | 2.4384E-22 |
| EGFR       | ENSG00000146648 | 1.09824544   | 2.9438E-22 |
| RHOB       | ENSG00000143878 | 1.12149127   | 3.1337E-22 |
| TNPO1      | ENSG00000083312 | 1.0954948    | 3.3117E-22 |
| CBX6       | ENSG00000183741 | -1.14401488  | 4.7423E-22 |
| FZD4       | ENSG00000174804 | -1.306929138 | 5.68E-22   |
| IFNL2      | ENSG00000183709 | -1.490353538 | 5.8728E-22 |
| SLC44A1    | ENSG00000070214 | -1.090869917 | 7.3238E-22 |
| HAS3       | ENSG00000103044 | 1.20523145   | 7.3965E-22 |
| IFNL3      | ENSG00000197110 | -1.570346974 | 8.0602E-22 |
| NEO1       | ENSG00000067141 | -1.153169802 | 9.4334E-22 |
| OTUD1      | ENSG00000165312 | -1.303555773 | 9.7485E-22 |
| PDE3A      | ENSG00000172572 | -1.78173128  | 9.8172E-22 |
| LIN7A      | ENSG00000111052 | -1.341616498 | 1.0292E-21 |
| GOLGA4     | ENSG00000144674 | 1.16345235   | 1.0895E-21 |
| SLC7A1     | ENSG00000139514 | 1.11594889   | 1.3385E-21 |
| ARHGEF40   | ENSG00000165801 | -1.357028158 | 1.4665E-21 |
| ZNF367     | ENSG00000165244 | 1.35367146   | 1.613E-21  |
| UPK3B      | ENSG00000243566 | -1.757735343 | 1.7775E-21 |
| PLEKHG2    | ENSG00000090924 | -1.185525346 | 2.0352E-21 |
| GOLT1B     | ENSG00000111711 | -1.184494316 | 2.3365E-21 |

|            |                 |             |            |
|------------|-----------------|-------------|------------|
| AP003119.3 | ENSG00000261578 | -1.51569978 | 2.7919E-21 |
| RAB37      | ENSG00000172794 | -1.78391543 | 3.134E-21  |
| ATF4       | ENSG00000128272 | 1.08668597  | 3.6818E-21 |
| DDIT4L     | ENSG00000145358 | -1.87359206 | 3.7118E-21 |
| LRFN1      | ENSG00000128011 | -1.37404180 | 3.7383E-21 |
| TMEM37     | ENSG00000171227 | -2.46638723 | 4.1171E-21 |
| PGM2L1     | ENSG00000165434 | -1.25546141 | 5.37E-21   |
| MZT1       | ENSG00000204899 | -1.34901071 | 5.856E-21  |
| UPP1       | ENSG00000183696 | 1.15309079  | 5.9603E-21 |
| BCAM       | ENSG00000187244 | -1.42548386 | 6.0181E-21 |
| RAB27B     | ENSG00000041353 | -1.04731041 | 6.6075E-21 |
| NRG1       | ENSG00000157168 | 1.11517563  | 7.7447E-21 |
| UGDH       | ENSG00000109814 | -1.01583166 | 1.0437E-20 |
| FAM129A    | ENSG00000135842 | 1.27708821  | 1.0567E-20 |
| AMIGO3     | ENSG00000176020 | -3.33884603 | 1.2195E-20 |
| CMTM6      | ENSG00000091317 | -1.10444308 | 1.2635E-20 |
| WRB        | ENSG00000182093 | -1.54463828 | 1.2824E-20 |
| SMAD6      | ENSG00000137834 | -1.14682475 | 1.3136E-20 |
| SCP2       | ENSG00000116171 | -1.18820496 | 1.3658E-20 |
| MIR22HG    | ENSG00000186594 | 1.70798643  | 1.722E-20  |
| MIB1       | ENSG00000101752 | -1.11868171 | 1.7749E-20 |
| SYT17      | ENSG00000103528 | -1.47095663 | 2.0982E-20 |
| KCNV1      | ENSG00000164794 | -1.39069341 | 2.2479E-20 |
| GABRE      | ENSG00000102287 | -1.09524610 | 2.2969E-20 |
| ALDH2      | ENSG00000111275 | -1.03856459 | 2.4555E-20 |
| GLI1       | ENSG00000111087 | -1.64516534 | 2.4834E-20 |
| LINC02582  | ENSG00000261780 | -1.23720738 | 2.5641E-20 |
| DCLK1      | ENSG00000133083 | 1.98376867  | 2.6037E-20 |
| CTPS1      | ENSG00000171793 | 1.08719552  | 2.6893E-20 |
| RHPN2      | ENSG00000131941 | -1.08068725 | 2.7496E-20 |
| CGN        | ENSG00000143375 | -1.89494878 | 3.0563E-20 |
| OAS2       | ENSG00000111335 | -1.53960799 | 3.1256E-20 |
| SEMA3B     | ENSG00000012171 | -1.52452109 | 3.2251E-20 |
| FLRT3      | ENSG00000125848 | -1.51202494 | 4.4641E-20 |
| CACNA1G    | ENSG00000006283 | -1.50457913 | 5.4681E-20 |
| IFNL1      | ENSG00000182393 | -1.05046890 | 6.7219E-20 |
| CNTN1      | ENSG00000018236 | -1.13729612 | 8.3499E-20 |
| COL4A4     | ENSG00000081052 | -1.31065972 | 8.3712E-20 |
| RBFOX3     | ENSG00000167281 | -2.08350040 | 8.831E-20  |
| IGFBP3     | ENSG00000146674 | 1.05994951  | 9.9563E-20 |
| C11orf68   | ENSG00000175573 | 1.26905821  | 9.967E-20  |
| UGT1A7     | ENSG00000244122 | -1.52027610 | 1.2356E-19 |
| IPMK       | ENSG00000151151 | -1.25378326 | 1.3837E-19 |
| FAM102A    | ENSG00000167106 | 1.05934658  | 1.4897E-19 |
| MYADM      | ENSG00000179820 | 1.04095346  | 1.5438E-19 |
| PLSCR4     | ENSG00000114698 | -1.80236351 | 1.569E-19  |
| TANC1      | ENSG00000115183 | -1.20210505 | 1.5726E-19 |
| SERINC5    | ENSG00000164300 | -1.22248353 | 1.5759E-19 |
| LIMK1      | ENSG00000106683 | 1.16649425  | 1.6733E-19 |
| MYO1A      | ENSG00000166866 | -3.88110144 | 1.7385E-19 |
| CSF1       | ENSG00000184371 | -1.12523100 | 1.9388E-19 |
| MSANTD3    | ENSG00000066697 | 1.12198978  | 2.1004E-19 |
| PON3       | ENSG00000105852 | -1.32842030 | 2.1207E-19 |
| GTF2IP4    | ENSG00000233369 | -1.04474020 | 2.1725E-19 |
| ARL6IP5    | ENSG00000144746 | -1.08471480 | 2.2877E-19 |
| CXXC4      | ENSG00000168772 | -2.72055701 | 2.4593E-19 |
| GMFB       | ENSG00000197045 | -1.06100872 | 2.4929E-19 |
| SHROOM3    | ENSG00000138771 | -1.64170564 | 2.7818E-19 |

|            |                 |              |            |
|------------|-----------------|--------------|------------|
| BRCA2      | ENSG00000139618 | 1.37441268   | 2.8085E-19 |
| TMED2      | ENSG00000086598 | -1.027308240 | 2.9248E-19 |
| SMO        | ENSG00000128602 | -1.370865884 | 3.216E-19  |
| PLEKHM1    | ENSG00000225190 | 1.14495107   | 3.7633E-19 |
| TUBB4A     | ENSG00000104833 | -1.584510647 | 4.3138E-19 |
| CA11       | ENSG00000063180 | -1.822096286 | 4.6506E-19 |
| HMGCS1     | ENSG00000112972 | 1.26626301   | 4.6936E-19 |
| PAPSS2     | ENSG00000198682 | -1.080347845 | 5.3576E-19 |
| BCHE       | ENSG00000114200 | -1.324058226 | 6.4258E-19 |
| NOL4L      | ENSG00000197183 | -1.323976777 | 8.8501E-19 |
| TNS2       | ENSG00000111077 | -1.329665817 | 1.0767E-18 |
| NR4A2      | ENSG00000153234 | -1.425617817 | 1.0783E-18 |
| PPARGC1A   | ENSG00000109819 | -2.316882482 | 1.1634E-18 |
| CMPK1      | ENSG00000162368 | -1.011738192 | 1.1709E-18 |
| AFAP1      | ENSG00000196526 | -1.051910227 | 1.1946E-18 |
| MYO18A     | ENSG00000196535 | -1.004304285 | 1.1996E-18 |
| FBXW11     | ENSG00000072803 | -1.062543714 | 1.2468E-18 |
| RRP12      | ENSG00000052749 | 1.05331584   | 1.3262E-18 |
| KIF12      | ENSG00000136883 | -1.994427664 | 1.6206E-18 |
| SLC44A2    | ENSG00000129353 | -1.602894543 | 1.719E-18  |
| TWNK       | ENSG00000107815 | -1.162846395 | 1.9981E-18 |
| NAB1       | ENSG00000138386 | -1.048423185 | 2.3201E-18 |
| TUFT1      | ENSG00000143367 | 1.21795099   | 2.3247E-18 |
| SUSD2      | ENSG00000099994 | -1.430968407 | 3.0355E-18 |
| FGL1       | ENSG00000104760 | -1.868648536 | 3.3829E-18 |
| CSGALNACT3 | ENSG00000169826 | 1.08627667   | 3.904E-18  |
| SOWAHC     | ENSG00000198142 | 1.21162295   | 4.3043E-18 |
| THBD       | ENSG00000178726 | 1.41273034   | 4.3119E-18 |
| BTBD11     | ENSG00000151136 | -1.172134624 | 4.5716E-18 |
| KCTD5      | ENSG00000167977 | 1.13253163   | 5.2359E-18 |
| GARS       | ENSG00000106105 | 1.00080545   | 5.7143E-18 |
| CLCF1      | ENSG00000175505 | 1.06559634   | 6.6438E-18 |
| FAM83A     | ENSG00000147689 | -2.002555807 | 6.7614E-18 |
| VEGFA      | ENSG00000112715 | 1.06407175   | 7.0606E-18 |
| IDE        | ENSG00000119912 | -1.016654047 | 7.3763E-18 |
| BDNF       | ENSG00000176697 | -2.095938030 | 7.7829E-18 |
| ARRB1      | ENSG00000137486 | -1.510112177 | 7.7883E-18 |
| ADRA1D     | ENSG00000171873 | -2.783655435 | 8.3684E-18 |
| CAPN15     | ENSG00000103326 | 1.04004796   | 9.3686E-18 |
| EPDR1      | ENSG00000086289 | -1.014223707 | 2.3701E-17 |
| CTNNAL1    | ENSG00000119326 | 1.04974859   | 2.5403E-17 |
| SLC6A9     | ENSG00000196517 | 1.36519889   | 2.671E-17  |
| DNM1       | ENSG00000106976 | -1.058668745 | 2.6854E-17 |
| CPOX       | ENSG00000080819 | -1.191167935 | 2.8555E-17 |
| CHMP1A     | ENSG00000131165 | 1.05521561   | 3.4825E-17 |
| PARM1      | ENSG00000169116 | -1.957160195 | 4.1166E-17 |
| SERTAD1    | ENSG00000197019 | 1.1973572    | 4.8533E-17 |
| C1GALT1C1  | ENSG00000171155 | -1.318580505 | 5.4305E-17 |
| SLC9A3R2   | ENSG00000065054 | -1.103162882 | 8.9329E-17 |
| ABCA1      | ENSG00000165029 | -1.005928366 | 1.1182E-16 |
| MEAF6      | ENSG00000163875 | -1.254291657 | 1.2844E-16 |
| CYB5A      | ENSG00000166347 | -1.240331395 | 1.3116E-16 |
| IL6R       | ENSG00000160712 | 2.09118294   | 1.6239E-16 |
| SPOCK1     | ENSG00000152377 | 1.61744452   | 1.6258E-16 |
| VASH2      | ENSG00000143494 | -2.551694953 | 1.6883E-16 |
| FILIP1     | ENSG00000118407 | -1.315057732 | 2.0309E-16 |
| FLCN       | ENSG00000154803 | 1.01748706   | 2.343E-16  |
| MGAM       | ENSG00000257335 | -1.687620645 | 2.4623E-16 |

|             |                 |              |            |
|-------------|-----------------|--------------|------------|
| CFB         | ENSG00000243649 | -1.007984439 | 2.6852E-16 |
| AC233724.15 | ENSG00000283740 | -3.284020650 | 3.0303E-16 |
| CH25H       | ENSG00000138135 | -1.649857114 | 3.071E-16  |
| ADD3        | ENSG00000148700 | -1.773836675 | 3.5061E-16 |
| NABP1       | ENSG00000173559 | 1.12010277   | 3.7389E-16 |
| DAGLB       | ENSG00000164535 | 1.16378284   | 4.6539E-16 |
| ZBTB32      | ENSG00000011590 | -1.829801079 | 5.3422E-16 |
| PROS1       | ENSG00000184500 | -1.099501379 | 5.7509E-16 |
| LBP         | ENSG00000129988 | -4.829440960 | 6.3705E-16 |
| NPY4R2      | ENSG00000264717 | -1.707985999 | 6.9155E-16 |
| CEP135      | ENSG00000174799 | 1.25246062   | 7.3846E-16 |
| PIGK        | ENSG00000142892 | -1.137758943 | 7.5498E-16 |
| FAM46A      | ENSG00000112773 | -1.245295880 | 8.2231E-16 |
| DCK         | ENSG00000156136 | -1.143738408 | 8.3461E-16 |
| DHTKD1      | ENSG00000181192 | -1.09820477  | 8.9138E-16 |
| AKNA        | ENSG00000106948 | 1.27274051   | 9.3029E-16 |
| NCOA2       | ENSG00000140396 | -1.024586363 | 9.3676E-16 |
| GMCL1       | ENSG00000087338 | -1.097436283 | 1.0021E-15 |
| PLA2G4A     | ENSG00000116711 | -1.081905447 | 1.1028E-15 |
| FCHSD2      | ENSG00000137478 | -1.176095477 | 1.1409E-15 |
| SUZ12       | ENSG00000178691 | -1.002295429 | 1.4714E-15 |
| JAKMIP3     | ENSG00000188385 | -1.191367264 | 1.4833E-15 |
| AL645608.1  | ENSG00000223764 | -2.33092555  | 1.5288E-15 |
| PAX7        | ENSG00000009709 | -1.143250306 | 1.854E-15  |
| SMAP2       | ENSG00000084070 | -1.561957623 | 1.9711E-15 |
| SELENBP1    | ENSG00000143416 | -2.901929703 | 2.1545E-15 |
| EFNA1       | ENSG00000169242 | -1.106140057 | 2.5142E-15 |
| SEMA4D      | ENSG00000187764 | -1.259138216 | 2.5718E-15 |
| MED10       | ENSG00000133398 | 1.02746932   | 2.7425E-15 |
| ANG         | ENSG00000214274 | -1.507472910 | 2.8122E-15 |
| PLLPL       | ENSG00000102934 | -1.459626009 | 2.8649E-15 |
| EEA1        | ENSG00000102189 | 1.22519433   | 2.9725E-15 |
| DOC2B       | ENSG00000272636 | -2.748662162 | 2.9858E-15 |
| APLP1       | ENSG00000105290 | -1.006748243 | 3.4766E-15 |
| NPY1R       | ENSG00000164128 | -3.266758336 | 3.5798E-15 |
| CASTOR3     | ENSG00000239521 | -1.384850069 | 4.1802E-15 |
| EBF4        | ENSG00000088881 | -1.751563878 | 4.665E-15  |
| AMPD3       | ENSG00000133805 | 2.39581215   | 4.8422E-15 |
| FOXA1       | ENSG00000129514 | -1.526327384 | 5.6474E-15 |
| RAVER1      | ENSG00000161847 | 1.1156526    | 5.7442E-15 |
| PIGW        | ENSG00000277161 | 1.0417443    | 6.1906E-15 |
| NDUFA5      | ENSG00000128609 | -1.236360134 | 6.2289E-15 |
| LINC01963   | ENSG00000260804 | -1.350486236 | 6.4197E-15 |
| NPY4R       | ENSG00000204174 | -1.500019630 | 6.7919E-15 |
| FAM69A      | ENSG00000154511 | -1.151774822 | 7.2617E-15 |
| ENTPD7      | ENSG00000198018 | 1.22313179   | 8.4347E-15 |
| PIM2        | ENSG00000102096 | -1.705772148 | 9.8556E-15 |
| ACSF2       | ENSG00000167107 | -1.49262051  | 1.0416E-14 |
| NR2F1       | ENSG00000175745 | -1.792188875 | 1.222E-14  |
| MEIOB       | ENSG00000162039 | 1.49053787   | 1.4126E-14 |
| HHIP        | ENSG00000164161 | -2.177119430 | 1.6137E-14 |
| ZMYM3       | ENSG00000147130 | -1.012986348 | 1.7764E-14 |
| ALDH1A3     | ENSG00000184254 | 1.10754309   | 1.8237E-14 |
| PIK3C2B     | ENSG00000133056 | -1.001496032 | 1.9517E-14 |
| SERPINI1    | ENSG00000163536 | -2.400549960 | 1.973E-14  |
| UBA3        | ENSG00000144744 | -1.029916952 | 2.0737E-14 |
| CABLES2     | ENSG00000149679 | -1.437249759 | 2.1149E-14 |
| DHRS3       | ENSG00000162496 | -1.513672849 | 2.717E-14  |

|            |                 |             |            |
|------------|-----------------|-------------|------------|
| IFNB1      | ENSG00000171855 | -1.42791208 | 2.8969E-14 |
| ITGA1      | ENSG00000213949 | -1.30680948 | 3.2031E-14 |
| UBE2L6     | ENSG00000156587 | -1.13197371 | 3.2315E-14 |
| HSPA4L     | ENSG00000164070 | -1.02342966 | 3.5057E-14 |
| ZNF467     | ENSG00000181444 | -3.00749828 | 3.6515E-14 |
| RAB3D      | ENSG00000105514 | -1.06406038 | 3.7528E-14 |
| IER3IP1    | ENSG00000134049 | -1.04802693 | 3.8471E-14 |
| KLHL23     | ENSG00000213160 | -1.13385619 | 4.483E-14  |
| RFC3       | ENSG00000133119 | -1.03939629 | 4.5529E-14 |
| SEMA7A     | ENSG00000138623 | 2.0159616   | 4.8944E-14 |
| ITGB6      | ENSG00000115221 | -1.64916440 | 5.1225E-14 |
| FAM19A5    | ENSG00000219438 | -1.87815427 | 5.1746E-14 |
| WNT9A      | ENSG00000143816 | 1.45950907  | 6.0746E-14 |
| LCLAT1     | ENSG00000172954 | -1.00232161 | 6.7242E-14 |
| CYR61      | ENSG00000142871 | 1.1249925   | 7.0989E-14 |
| PHACTR2    | ENSG00000112419 | -1.06306204 | 7.4507E-14 |
| MFSD2A     | ENSG00000168389 | -1.50779745 | 7.6972E-14 |
| DOCK8      | ENSG00000107099 | -1.46767690 | 7.7497E-14 |
| TUB        | ENSG00000166402 | -1.14585082 | 8.0411E-14 |
| CTSF       | ENSG00000174080 | -1.21259543 | 8.365E-14  |
| CDH4       | ENSG00000179242 | 1.56573286  | 8.4011E-14 |
| TST        | ENSG00000128311 | -1.01124393 | 8.8115E-14 |
| OXTR       | ENSG00000180914 | 1.2341333   | 1.0257E-13 |
| DDIT3      | ENSG00000175197 | 1.76927694  | 1.0345E-13 |
| IBA57      | ENSG00000181873 | 1.28342092  | 1.0605E-13 |
| SYT6       | ENSG00000134207 | -1.39262811 | 1.12E-13   |
| TRIM2      | ENSG00000109654 | -1.95356335 | 1.1576E-13 |
| TMCC1      | ENSG00000172765 | 1.02916913  | 1.2437E-13 |
| RTL9       | ENSG00000243978 | -1.69589428 | 1.336E-13  |
| DUSP7      | ENSG00000164086 | 1.27866092  | 1.3461E-13 |
| SULT2B1    | ENSG00000088002 | -1.86961103 | 1.6696E-13 |
| ZNF704     | ENSG00000164684 | -1.19688956 | 1.7606E-13 |
| DNAJB2     | ENSG00000135924 | 1.00103266  | 1.771E-13  |
| CACNA1D    | ENSG00000157388 | -1.14862021 | 1.9293E-13 |
| CD163L1    | ENSG00000177675 | 2.7098134   | 2.0508E-13 |
| EPC2       | ENSG00000135999 | 1.05180337  | 2.1701E-13 |
| TFDP2      | ENSG00000114126 | -1.00017075 | 2.5181E-13 |
| EXPH5      | ENSG00000110723 | 1.47461925  | 2.5199E-13 |
| BICDL1     | ENSG00000135127 | -1.25522686 | 2.5259E-13 |
| C10orf91   | ENSG00000180066 | -1.77536890 | 2.6768E-13 |
| PDK3       | ENSG00000067992 | -1.29112780 | 2.9351E-13 |
| RAB29      | ENSG00000117280 | -1.10377442 | 3.0305E-13 |
| OPHN1      | ENSG00000079482 | -1.22481655 | 3.0612E-13 |
| PNPO       | ENSG00000108439 | -1.04875285 | 3.116E-13  |
| PRNP       | ENSG00000171867 | 1.88735544  | 3.2402E-13 |
| AC004656.1 | ENSG00000260822 | -1.23996851 | 3.4436E-13 |
| GRB7       | ENSG00000141738 | -1.45597996 | 3.7324E-13 |
| TTC33      | ENSG00000113638 | -1.23153020 | 4.0231E-13 |
| SP2        | ENSG00000167182 | 1.04268823  | 4.5544E-13 |
| COPS7A     | ENSG00000111652 | -1.00281740 | 4.7575E-13 |
| MYRF       | ENSG00000124920 | -1.10438969 | 4.9251E-13 |
| PLEKHA4    | ENSG00000105559 | -1.12835782 | 5.8394E-13 |
| FRK        | ENSG00000111816 | -1.08937988 | 6.0924E-13 |
| SAV1       | ENSG00000151748 | -1.01299064 | 6.4074E-13 |
| FBXL17     | ENSG00000145743 | -1.22194548 | 6.4243E-13 |
| SLFNL1-AS1 | ENSG00000281207 | 1.65846537  | 6.9482E-13 |
| VTN        | ENSG00000109072 | -1.58047327 | 1.0329E-12 |
| CEBPA      | ENSG00000245848 | -1.36037449 | 1.0448E-12 |



|            |                 |              |            |
|------------|-----------------|--------------|------------|
| STRADB     | ENSG00000082146 | -1.246804646 | 1.1442E-12 |
| LRIG1      | ENSG00000144749 | -1.214942587 | 1.2427E-12 |
| SEMA6B     | ENSG00000167680 | -1.281261346 | 1.2784E-12 |
| F7         | ENSG00000057593 | -2.592447494 | 1.4694E-12 |
| ADPRHL2    | ENSG00000116863 | 1.06289591   | 1.4957E-12 |
| KSR2       | ENSG00000171435 | 1.46852634   | 1.5403E-12 |
| LRRC8B     | ENSG00000197147 | -1.087837200 | 1.5807E-12 |
| ZNF107     | ENSG00000196247 | 1.37167144   | 1.6254E-12 |
| ZNF185     | ENSG00000147394 | 1.26408032   | 1.8904E-12 |
| AC007325.2 | ENSG00000277196 | -2.285595190 | 2.0289E-12 |
| LIPA       | ENSG00000107798 | -1.732605550 | 2.2104E-12 |
| RTN4R      | ENSG00000040608 | 1.68278172   | 2.4083E-12 |
| L3MBTL3    | ENSG00000198945 | -1.610608114 | 2.4514E-12 |
| LHPP       | ENSG00000107902 | -1.362177870 | 2.6357E-12 |
| ELOVL3     | ENSG00000119915 | -2.472440290 | 2.6396E-12 |
| TC2N       | ENSG00000165929 | -1.495274950 | 2.7997E-12 |
| TMEM164    | ENSG00000157600 | -1.828284490 | 3.3342E-12 |
| GPR20      | ENSG00000204882 | -2.167499560 | 3.3698E-12 |
| USP18      | ENSG00000184979 | -1.170148720 | 3.4E-12    |
| C3orf58    | ENSG00000181744 | -1.467642740 | 3.7274E-12 |
| ING1       | ENSG00000153487 | 1.20614002   | 4.2174E-12 |
| PTP4A3     | ENSG00000184489 | -1.237843514 | 4.3492E-12 |
| ADAM23     | ENSG00000114948 | -1.046338260 | 6.1776E-12 |
| RN7SK      | ENSG00000283293 | 1.49530442   | 6.3453E-12 |
| GYG2       | ENSG00000056998 | -1.809272700 | 7.0973E-12 |
| HHEX       | ENSG00000152804 | -1.126580350 | 7.6254E-12 |
| MAPRE3     | ENSG00000084764 | -1.167201257 | 8.4511E-12 |
| CDC25A     | ENSG00000164045 | 1.06812469   | 1.1914E-11 |
| PELI2      | ENSG00000139946 | -1.560169050 | 1.3908E-11 |
| PRR15      | ENSG00000176532 | -1.238282277 | 1.4469E-11 |
| STAG3      | ENSG00000066923 | -1.372634497 | 1.5478E-11 |
| TRIM31     | ENSG00000204616 | -3.299401850 | 1.9221E-11 |
| UNC13A     | ENSG00000130477 | -1.248841290 | 1.9367E-11 |
| RGS20      | ENSG00000147509 | 1.19308099   | 2.1192E-11 |
| EHD3       | ENSG00000013016 | -1.188442370 | 2.1478E-11 |
| METTL7B    | ENSG00000170439 | -1.419976560 | 2.2147E-11 |
| PDGFRL     | ENSG00000104213 | -1.640294207 | 2.3558E-11 |
| GPR35      | ENSG00000178623 | -2.340710260 | 2.3861E-11 |
| ADM2       | ENSG00000128165 | 1.47996372   | 2.4319E-11 |
| MVB12A     | ENSG00000141971 | -1.050931040 | 3.3644E-11 |
| CES1       | ENSG00000198848 | -1.043025080 | 3.3959E-11 |
| SLC16A4    | ENSG00000168679 | -1.118497010 | 3.9886E-11 |
| PADI1      | ENSG00000142623 | 2.58949341   | 4.0023E-11 |
| NNMT       | ENSG00000166741 | -1.203586830 | 4.2245E-11 |
| ATP4A      | ENSG00000105675 | -1.637527137 | 4.3128E-11 |
| MED12L     | ENSG00000144893 | -1.667520630 | 4.3909E-11 |
| TLE2       | ENSG00000065717 | -1.719126710 | 4.5368E-11 |
| SH2D5      | ENSG00000189410 | 1.83872572   | 4.8406E-11 |
| GPR37      | ENSG00000170775 | -1.679581100 | 6.0318E-11 |
| HADH       | ENSG00000138796 | -1.116414590 | 6.0929E-11 |
| ADAMTS10   | ENSG00000142303 | -1.192183740 | 6.1599E-11 |
| ZNF516     | ENSG00000101493 | -1.320233950 | 6.362E-11  |
| ATF5       | ENSG00000169136 | 1.04370658   | 6.6197E-11 |
| HRH2       | ENSG00000113749 | -2.409181730 | 6.9111E-11 |
| BMP4       | ENSG00000125378 | -2.181549110 | 8.0692E-11 |
| RAB20      | ENSG00000139832 | -1.898947250 | 9.6196E-11 |
| CTGF       | ENSG00000118523 | 1.12007332   | 9.9536E-11 |
| C8orf58    | ENSG00000241852 | 1.24278651   | 1.0297E-10 |

|            |                 |              |            |
|------------|-----------------|--------------|------------|
| GLIPR1     | ENSG00000139278 | 1.05087522   | 1.4531E-10 |
| SLC4A4     | ENSG00000080493 | -1.915551607 | 1.481E-10  |
| CGB8       | ENSG00000213030 | 3.57068987   | 1.5541E-10 |
| DNAH17     | ENSG00000187775 | 1.25488913   | 1.6187E-10 |
| LRRRC4B    | ENSG00000131409 | -2.634740375 | 1.9397E-10 |
| HNF1A-AS1  | ENSG00000241388 | -2.549884955 | 1.9933E-10 |
| BARD1      | ENSG00000138376 | -1.164036100 | 2.02E-10   |
| CCDC92     | ENSG00000119242 | 1.03187839   | 2.0957E-10 |
| SLC7A2     | ENSG00000003989 | -1.381902997 | 2.1154E-10 |
| SLC25A29   | ENSG00000197119 | -1.102112187 | 2.2455E-10 |
| RHOA       | ENSG00000116574 | -1.160319489 | 2.3236E-10 |
| C1orf115   | ENSG00000162817 | -1.128127448 | 2.3852E-10 |
| LIMA1      | ENSG00000050405 | 1.12964045   | 2.4253E-10 |
| MAP3K12    | ENSG00000139625 | -1.004288983 | 2.7791E-10 |
| RBPMS2     | ENSG00000166831 | -2.302934225 | 2.9468E-10 |
| LRP4       | ENSG00000134569 | -1.071062336 | 3.1543E-10 |
| SEMA3A     | ENSG00000075213 | -1.108320048 | 3.707E-10  |
| ST8SIA4    | ENSG00000113532 | -1.484832104 | 4.5479E-10 |
| PDE8B      | ENSG00000113231 | -1.265303505 | 4.6341E-10 |
| SLC27A2    | ENSG00000140284 | -1.174801779 | 5.855E-10  |
| ALDH5A1    | ENSG00000112294 | -1.126674422 | 6.2629E-10 |
| HYAL4      | ENSG00000106302 | -3.456132343 | 6.3159E-10 |
| AC092118.1 | ENSG00000187185 | -1.255788946 | 6.5562E-10 |
| BMP8B      | ENSG00000116985 | -1.116607249 | 7.4005E-10 |
| AP000769.1 | ENSG00000173727 | -1.595596424 | 7.475E-10  |
| SCD5       | ENSG00000145284 | -1.180562463 | 8.751E-10  |
| SH2B2      | ENSG00000160999 | -1.702944172 | 9.1411E-10 |
| NDRG2      | ENSG00000165795 | -1.867273980 | 9.3551E-10 |
| RBM38      | ENSG00000132819 | 1.36006298   | 1.1341E-09 |
| HUNK       | ENSG00000142149 | -1.582864018 | 1.1818E-09 |
| FAM102B    | ENSG00000162636 | -1.289575845 | 1.3212E-09 |
| ZNF703     | ENSG00000183779 | -1.713408156 | 1.351E-09  |
| AC023157.3 | ENSG00000276900 | 1.77119994   | 1.4234E-09 |
| ZNF75A     | ENSG00000162086 | 1.10996664   | 1.4973E-09 |
| CACNG6     | ENSG00000130433 | -1.061725780 | 1.5115E-09 |
| KRT17      | ENSG00000128422 | -1.326850624 | 1.6534E-09 |
| HS3ST3B1   | ENSG00000125430 | -2.128023664 | 1.7699E-09 |
| FBLN5      | ENSG00000140092 | -1.888544559 | 2.0653E-09 |
| HMGCR      | ENSG00000113161 | 1.04039212   | 2.089E-09  |
| FGG        | ENSG00000171557 | -2.280408218 | 2.1819E-09 |
| SYT12      | ENSG00000173227 | -1.285928949 | 2.1992E-09 |
| EOGT       | ENSG00000163378 | 1.0882206    | 2.2474E-09 |
| PRG4       | ENSG00000116690 | -1.796135705 | 2.2795E-09 |
| SIX4       | ENSG00000100625 | -1.054381327 | 2.3006E-09 |
| BCL6       | ENSG00000113916 | -1.312866344 | 2.3777E-09 |
| RBM20      | ENSG00000203867 | -1.049458554 | 2.6314E-09 |
| AOX1       | ENSG00000138356 | 1.16562593   | 2.6398E-09 |
| CACNA1H    | ENSG00000196557 | -1.145398844 | 2.6726E-09 |
| RARRES3    | ENSG00000133321 | -1.202625332 | 2.7386E-09 |
| VSTM2L     | ENSG00000132821 | -2.586948795 | 3.0331E-09 |
| MERTK      | ENSG00000153208 | -1.825922227 | 3.1151E-09 |
| AC010531.1 | ENSG00000131152 | Inf          | 3.1622E-09 |
| ANKRD1     | ENSG00000148677 | 2.1143223    | 3.2084E-09 |
| KCNH1      | ENSG00000143473 | 1.5704407    | 3.2205E-09 |
| RIN1       | ENSG00000174791 | 1.00445161   | 3.4729E-09 |
| C1QTNF6    | ENSG00000133466 | -1.177004880 | 3.5049E-09 |
| SP6        | ENSG00000189120 | 1.47841741   | 3.546E-09  |
| VANGL2     | ENSG00000162738 | -1.272489978 | 3.691E-09  |

|            |                 |              |            |
|------------|-----------------|--------------|------------|
| SLC29A4    | ENSG00000164638 | -1.205243470 | 3.73E-09   |
| SYNGR1     | ENSG00000100321 | -1.170130079 | 4.6243E-09 |
| PEAR1      | ENSG00000187800 | 1.88055864   | 5.1623E-09 |
| FBXL12     | ENSG00000127452 | 1.05948302   | 5.9369E-09 |
| RHBDL3     | ENSG00000141314 | -2.026880522 | 6.3441E-09 |
| MGST2      | ENSG00000085871 | -1.076890697 | 7.9906E-09 |
| CPM        | ENSG00000135678 | 1.09194813   | 8.0216E-09 |
| CAMSAP3    | ENSG00000076826 | -1.432421637 | 8.3105E-09 |
| AP1M2      | ENSG00000129354 | -1.284533122 | 8.3599E-09 |
| GTF2IP7    | ENSG00000227038 | 1.47823092   | 8.5396E-09 |
| KLF5       | ENSG00000102554 | -1.377217294 | 8.5874E-09 |
| ETV1       | ENSG00000006468 | -1.130123965 | 8.6106E-09 |
| FRMD3      | ENSG00000172159 | -1.136585813 | 8.6343E-09 |
| KRT15      | ENSG00000171346 | 1.90095673   | 8.8875E-09 |
| DTX2P1-UPK | ENSG00000265479 | -1.229004914 | 9.026E-09  |
| SGPP2      | ENSG00000163082 | -1.139549392 | 9.2346E-09 |
| SHISAL1    | ENSG00000138944 | 1.27715803   | 1.0333E-08 |
| AC015813.6 | ENSG00000279207 | -1.133621472 | 1.0389E-08 |
| ARAP3      | ENSG00000120318 | -1.023059007 | 1.0767E-08 |
| P2RY6      | ENSG00000171631 | -1.123960530 | 1.1189E-08 |
| TMEM158    | ENSG00000249992 | 1.37953862   | 1.1386E-08 |
| RHPN1      | ENSG00000158106 | -1.007937088 | 1.19E-08   |
| ST6GAL1    | ENSG00000073849 | -1.121106454 | 1.2118E-08 |
| BCAS1      | ENSG00000064787 | -1.676250185 | 1.2159E-08 |
| SNTB1      | ENSG00000172164 | -1.091307846 | 1.3115E-08 |
| SH3BGRL2   | ENSG00000198478 | -1.172854463 | 1.4864E-08 |
| BMPR1B     | ENSG00000138696 | -1.286717954 | 1.5032E-08 |
| POC1B-GALN | ENSG00000259075 | -6.236683918 | 1.5277E-08 |
| AP001972.5 | ENSG00000279117 | -1.401972165 | 1.6882E-08 |
| MARCH9     | ENSG00000139266 | -1.119467107 | 1.7384E-08 |
| FNIP2      | ENSG00000052795 | -1.084881375 | 1.9285E-08 |
| FYN        | ENSG00000010810 | -1.276713219 | 2.0071E-08 |
| SLFNL1     | ENSG00000171790 | 1.54010862   | 2.1807E-08 |
| PXK        | ENSG00000168297 | -1.290245754 | 2.184E-08  |
| CHST1      | ENSG00000175264 | 2.80968218   | 2.257E-08  |
| C9orf152   | ENSG00000188959 | -2.539445125 | 2.3376E-08 |
| DGCR6      | ENSG00000183628 | -1.213997477 | 2.4389E-08 |
| MIR29B2CHG | ENSG00000203709 | -1.110291998 | 2.7991E-08 |
| AC016831.7 | ENSG00000285106 | -1.876420427 | 2.8483E-08 |
| PARS2      | ENSG00000162396 | -1.336735716 | 3.0043E-08 |
| GSTM4      | ENSG00000168765 | -1.544596163 | 3.1281E-08 |
| MEX3A      | ENSG00000254726 | -1.282807935 | 3.1544E-08 |
| CYP4F12    | ENSG00000186204 | -1.346166593 | 3.1897E-08 |
| AC007325.4 | ENSG00000278817 | -1.116913984 | 3.6631E-08 |
| GNAZ       | ENSG00000128266 | -1.393465079 | 3.8847E-08 |
| FOSB       | ENSG00000125740 | 1.57612429   | 3.9165E-08 |
| SAP30L     | ENSG00000164576 | -1.428630107 | 4.4134E-08 |
| EHHADH     | ENSG00000113790 | -1.130861174 | 5.2156E-08 |
| DIO2       | ENSG00000211448 | 1.40009656   | 5.3491E-08 |
| PELI1      | ENSG00000197329 | -1.125915123 | 5.3612E-08 |
| ATXN7L2    | ENSG00000162650 | 1.92814753   | 5.3669E-08 |
| HSPA6      | ENSG00000173110 | 1.91533306   | 6.0493E-08 |
| CTNNBIP1   | ENSG00000178585 | -1.175082937 | 6.1217E-08 |
| CCDC106    | ENSG00000173581 | -1.004955198 | 6.3693E-08 |
| SATB2      | ENSG00000119042 | -1.016028538 | 6.8541E-08 |
| TMEM170B   | ENSG00000205269 | -1.343521848 | 7.1762E-08 |
| ONECUT2    | ENSG00000119547 | -1.129748994 | 7.2348E-08 |
| TBKBP1     | ENSG00000198933 | -1.149441390 | 7.3232E-08 |

|            |                 |              |            |
|------------|-----------------|--------------|------------|
| JAZF1      | ENSG00000153814 | -1.016876184 | 7.6535E-08 |
| IPO4       | ENSG00000196497 | 1.01978913   | 7.6846E-08 |
| NKAIN4     | ENSG00000101198 | -1.989240447 | 8.7159E-08 |
| SRPX2      | ENSG00000102359 | -1.105408737 | 9.993E-08  |
| INSL4      | ENSG00000120211 | -1.027773933 | 1.0694E-07 |
| AK7        | ENSG00000140057 | -1.431270248 | 1.0815E-07 |
| RGS9       | ENSG00000108370 | -1.067076707 | 1.1455E-07 |
| SEMA3D     | ENSG00000153993 | -1.397963539 | 1.211E-07  |
| AC010997.3 | ENSG00000270087 | -7.106039714 | 1.211E-07  |
| AC012513.3 | ENSG00000279348 | -1.226266338 | 1.2254E-07 |
| HHIP-AS1   | ENSG00000248890 | -2.228235158 | 1.3065E-07 |
| ENO1P1     | ENSG00000244457 | -1.716787183 | 1.3118E-07 |
| HNMT       | ENSG00000150540 | -1.220154176 | 1.3747E-07 |
| FJX1       | ENSG00000179431 | 1.02206062   | 1.389E-07  |
| FMO5       | ENSG00000131781 | -1.862198457 | 1.4488E-07 |
| ISY1-RAB43 | ENSG00000261796 | Inf          | 1.456E-07  |
| AC008440.3 | ENSG00000232324 | 1.25961539   | 1.4685E-07 |
| AL583856.1 | ENSG00000232389 | 1.33177295   | 1.482E-07  |
| PLEKHH2    | ENSG00000152527 | -1.382399437 | 1.5717E-07 |
| AL133352.1 | ENSG00000255339 | -1.376059985 | 1.5947E-07 |
| ZNF862     | ENSG00000106479 | -1.132440729 | 1.6475E-07 |
| CASTOR2    | ENSG00000274070 | -1.352158534 | 1.6751E-07 |
| TEAD3      | ENSG00000007866 | -1.045472265 | 1.85E-07   |
| DPCD       | ENSG00000166171 | -1.305189447 | 1.9506E-07 |
| FAM234B    | ENSG00000084444 | -1.103705252 | 2.2181E-07 |
| NID1       | ENSG00000116962 | -1.012796839 | 2.2983E-07 |
| POU2F1     | ENSG00000143190 | -1.354021738 | 2.5684E-07 |
| OLAH       | ENSG00000152463 | 2.28348109   | 2.7531E-07 |
| ENTPD2     | ENSG00000054179 | -2.362635146 | 2.7623E-07 |
| ZBTB43     | ENSG00000169155 | 1.08480842   | 2.9325E-07 |
| PPFIA3     | ENSG00000177380 | -1.118859058 | 2.9782E-07 |
| BCORL1     | ENSG00000085185 | -1.012187606 | 3.4163E-07 |
| KCNH3      | ENSG00000135519 | -1.664367700 | 3.5299E-07 |
| ALB        | ENSG00000163631 | 2.85780566   | 3.6068E-07 |
| SPNS2      | ENSG00000183018 | 1.37066695   | 3.6692E-07 |
| SMARCD3    | ENSG00000082014 | -1.214828192 | 3.6918E-07 |
| ABCC6      | ENSG00000091262 | -1.776527500 | 3.7741E-07 |
| DTX4       | ENSG00000110042 | -1.989157495 | 3.8212E-07 |
| GALNT9     | ENSG00000182870 | 2.1743885    | 3.938E-07  |
| TM7SF2     | ENSG00000149809 | -1.112621580 | 3.9829E-07 |
| ICAM5      | ENSG00000105376 | -1.972431025 | 4.0959E-07 |
| GRTP1      | ENSG00000139835 | -1.779956309 | 4.7101E-07 |
| LINC01583  | ENSG00000259518 | 3.45129196   | 4.8001E-07 |
| N6AMT1     | ENSG00000156239 | -1.010342712 | 4.8455E-07 |
| PHF21A     | ENSG00000135365 | -1.004932866 | 4.9968E-07 |
| HNF1A      | ENSG00000135100 | -1.465771467 | 5.2328E-07 |
| KRT8       | ENSG00000170421 | -1.000995402 | 5.2911E-07 |
| CD302      | ENSG00000241399 | -1.349307812 | 5.683E-07  |
| CRYM       | ENSG00000103316 | -1.528709052 | 5.8905E-07 |
| TM4SF5     | ENSG00000142484 | -4.106884069 | 5.9155E-07 |
| AL451069.3 | ENSG00000234311 | -2.343333224 | 6.017E-07  |
| SCN3A      | ENSG00000153253 | -1.450059427 | 6.0999E-07 |
| BDH2       | ENSG00000164039 | -1.230427285 | 6.4668E-07 |
| AC099509.1 | ENSG00000249746 | -4.478912635 | 6.4923E-07 |
| SSBP3      | ENSG00000157216 | -1.302870485 | 6.6366E-07 |
| ECM1       | ENSG00000143369 | 1.45538597   | 6.9343E-07 |
| KCNN1      | ENSG00000105642 | -1.442022950 | 7.2573E-07 |
| COLCA2     | ENSG00000214290 | -2.715546318 | 7.4704E-07 |

|            |                 |             |            |
|------------|-----------------|-------------|------------|
| UGT1A1     | ENSG00000241635 | -1.77466554 | 7.7015E-07 |
| GPR146     | ENSG00000164849 | 2.15265535  | 7.9608E-07 |
| SLC17A1    | ENSG00000124568 | -3.14978952 | 8.3087E-07 |
| TTLL6      | ENSG00000170703 | -1.84509095 | 8.3576E-07 |
| EMC3-AS1   | ENSG00000180385 | 2.24436493  | 8.6139E-07 |
| ADAMTS16   | ENSG00000145536 | 1.27975699  | 8.7188E-07 |
| ITPKA      | ENSG00000137825 | 1.83606368  | 9.307E-07  |
| SALL1      | ENSG00000103449 | -1.27571284 | 9.9643E-07 |
| HOXA13     | ENSG00000106031 | -1.56028624 | 1.0701E-06 |
| SNAP25-AS1 | ENSG00000227906 | -1.72691828 | 1.0735E-06 |
| PROB1      | ENSG00000228672 | -1.79387475 | 1.1913E-06 |
| NDRG1      | ENSG00000104419 | 1.19404051  | 1.3095E-06 |
| EFHD1      | ENSG00000115468 | -1.66363701 | 1.3925E-06 |
| ZNF329     | ENSG00000181894 | 1.66374005  | 1.4032E-06 |
| CYP1B1     | ENSG00000138061 | 1.04000761  | 1.4037E-06 |
| AC008429.1 | ENSG00000204758 | 1.64717575  | 1.5477E-06 |
| RF00096    | ENSG00000238840 | -1.20453801 | 1.5654E-06 |
| PDE2A      | ENSG00000186642 | 1.53271462  | 1.6784E-06 |
| CYP1A1     | ENSG00000140465 | 2.86703717  | 1.6813E-06 |
| BHLHB9     | ENSG00000198908 | -1.36326935 | 1.7957E-06 |
| GRB14      | ENSG00000115290 | -1.01007089 | 1.8414E-06 |
| GRIN3B     | ENSG00000116032 | -1.26302447 | 1.8679E-06 |
| MDK        | ENSG00000110492 | -1.27105178 | 1.9586E-06 |
| APOA2      | ENSG00000158874 | Inf         | 2.2153E-06 |
| DEPDC7     | ENSG00000121690 | -1.20379324 | 2.3576E-06 |
| SCARA5     | ENSG00000168079 | -1.83212013 | 2.4542E-06 |
| DICER1-AS1 | ENSG00000235706 | -1.90049534 | 2.8555E-06 |
| INTU       | ENSG00000164066 | -1.03215660 | 2.8593E-06 |
| APOH       | ENSG00000091583 | -1.25910982 | 2.8848E-06 |
| TXNDC16    | ENSG00000087301 | -1.46091360 | 2.9161E-06 |
| MEIS2      | ENSG00000134138 | -1.19842777 | 2.928E-06  |
| LINC01719  | ENSG00000233396 | -2.03875326 | 2.9776E-06 |
| PRODH2     | ENSG00000250799 | -2.69268038 | 3.1045E-06 |
| GREB1      | ENSG00000196208 | 1.01773902  | 3.1225E-06 |
| LINC02532  | ENSG00000235142 | -1.52666114 | 3.2634E-06 |
| MAP3K14-AS | ENSG00000267278 | -1.27897756 | 3.2985E-06 |
| CISH       | ENSG00000114737 | -1.48864521 | 3.4156E-06 |
| AC008537.3 | ENSG00000279108 | -1.93902605 | 3.7461E-06 |
| HOXA-AS2   | ENSG00000253552 | -1.60014164 | 3.822E-06  |
| NKX2-5     | ENSG00000183072 | 1.42643003  | 3.9305E-06 |
| ALDOC      | ENSG00000109107 | 1.1298441   | 4.0984E-06 |
| KRT8P3     | ENSG00000254285 | -1.05184956 | 4.1767E-06 |
| UGT1A9     | ENSG00000241119 | -2.64768563 | 4.2295E-06 |
| ULBP1      | ENSG00000111981 | 1.46051919  | 4.4307E-06 |
| MB         | ENSG00000198125 | -1.80465159 | 4.5127E-06 |
| BCL11B     | ENSG00000127152 | -1.95746175 | 4.7935E-06 |
| AXIN2      | ENSG00000168646 | -1.45568867 | 4.8544E-06 |
| AL645608.3 | ENSG00000230699 | -2.16080880 | 5.0228E-06 |
| C5AR1      | ENSG00000197405 | -1.63991122 | 5.4281E-06 |
| AP000757.2 | ENSG00000254844 | -1.48269797 | 5.4727E-06 |
| CCDC146    | ENSG00000135205 | -1.28416483 | 5.4897E-06 |
| CD14       | ENSG00000170458 | -2.01155374 | 5.9308E-06 |
| ASF1B      | ENSG00000105011 | -1.01655848 | 6.2561E-06 |
| COL17A1    | ENSG00000065618 | 1.45956673  | 6.3342E-06 |
| HOXB8      | ENSG00000120068 | -1.34413720 | 6.4664E-06 |
| ITIH2      | ENSG00000151655 | -1.49717962 | 6.6856E-06 |
| ASGR1      | ENSG00000141505 | -1.99967467 | 6.797E-06  |
| ZNF841     | ENSG00000197608 | 1.05075992  | 6.8599E-06 |

|              |                 |             |            |
|--------------|-----------------|-------------|------------|
| PYROXD2      | ENSG00000119943 | -1.16171793 | 7.3522E-06 |
| RBP4         | ENSG00000138207 | -1.72343187 | 7.3629E-06 |
| SEPSECS      | ENSG00000109618 | -1.09171563 | 7.898E-06  |
| SRRM3        | ENSG00000177679 | -1.09399625 | 8.2304E-06 |
| IL22RA1      | ENSG00000142677 | -1.11512598 | 8.3196E-06 |
| AL031009.1   | ENSG00000278987 | 1.78335237  | 8.4577E-06 |
| RETREG1      | ENSG00000154153 | -1.74443127 | 8.574E-06  |
| IFITM3       | ENSG00000142089 | -1.83374367 | 8.9096E-06 |
| HBEGF        | ENSG00000113070 | 1.05457315  | 9.4118E-06 |
| AC100803.2   | ENSG00000261655 | -2.03936918 | 9.5137E-06 |
| CYGB         | ENSG00000161544 | -2.57992439 | 1.0331E-05 |
| GAS6-AS1     | ENSG00000233695 | -1.37435342 | 1.0401E-05 |
| PISD         | ENSG00000241878 | 1.03042726  | 1.1059E-05 |
| PLA2R1       | ENSG00000153246 | -1.15910189 | 1.1091E-05 |
| SMKR1        | ENSG00000240204 | -1.37646924 | 1.1105E-05 |
| MIR600HG     | ENSG00000236901 | -1.30943214 | 1.1346E-05 |
| C3orf33      | ENSG00000174928 | -1.65343460 | 1.1637E-05 |
| CRYAB        | ENSG00000109846 | -2.47408806 | 1.256E-05  |
| VWA1         | ENSG00000179403 | -1.12871757 | 1.2875E-05 |
| AC108751.5   | ENSG00000244503 | -2.09182375 | 1.3716E-05 |
| ADGRA2       | ENSG00000020181 | -1.33415171 | 1.5658E-05 |
| TP53I11      | ENSG00000175274 | -1.09060680 | 1.5784E-05 |
| VASH1        | ENSG00000071246 | -1.02325501 | 1.5935E-05 |
| C4BPA        | ENSG00000123838 | -2.11441494 | 1.6937E-05 |
| ZNF470       | ENSG00000197016 | 1.0170833   | 1.6977E-05 |
| BEX2         | ENSG00000133134 | 1.04914301  | 1.7023E-05 |
| SERPINA6     | ENSG00000170099 | -1.64172462 | 1.7424E-05 |
| JMJD7-PLA2G3 | ENSG00000168970 | -1.17899669 | 1.7557E-05 |
| GSDMB        | ENSG00000073605 | -1.43315364 | 1.7877E-05 |
| ZFYVE28      | ENSG00000159733 | -1.11610030 | 1.8045E-05 |
| GAL          | ENSG00000069482 | 1.45498122  | 1.8276E-05 |
| SULT1A4      | ENSG00000213648 | -1.93975933 | 1.8581E-05 |
| NES          | ENSG00000132688 | -1.51921564 | 1.8801E-05 |
| TMEM121      | ENSG00000184986 | -1.83628150 | 1.9322E-05 |
| FO681492.1   | ENSG00000277758 | -1.34281607 | 1.9974E-05 |
| CEMIP        | ENSG00000103888 | 1.25714412  | 2.0046E-05 |
| NFIA         | ENSG00000162599 | -1.08022727 | 2.1115E-05 |
| C21orf91     | ENSG00000154642 | -2.11531164 | 2.1747E-05 |
| FIBCD1       | ENSG00000130720 | -1.13348837 | 2.1748E-05 |
| H19          | ENSG00000130600 | -1.65426558 | 2.1808E-05 |
| F3           | ENSG00000117525 | 1.26780794  | 2.2422E-05 |
| EXOC3L4      | ENSG00000205436 | -1.30860938 | 2.3014E-05 |
| AC008105.1   | ENSG00000233175 | -1.79148697 | 2.3982E-05 |
| HIGD1A       | ENSG00000181061 | 1.04019001  | 2.4537E-05 |
| MRPL49       | ENSG00000149792 | -1.26779028 | 2.4668E-05 |
| CYB561D1     | ENSG00000174151 | 1.42040542  | 2.4853E-05 |
| IL31RA       | ENSG00000164509 | 1.40048731  | 2.7256E-05 |
| UST          | ENSG00000111962 | -1.33184246 | 2.7612E-05 |
| ZNF229       | ENSG00000278318 | 1.14064329  | 2.7847E-05 |
| URB1-AS1     | ENSG00000256073 | -1.13074143 | 2.9991E-05 |
| PLA2G6       | ENSG00000184381 | -1.11064073 | 3.1032E-05 |
| LINC00342    | ENSG00000232931 | 1.00453216  | 3.1451E-05 |
| RAB3A        | ENSG00000105649 | -2.23991385 | 3.2415E-05 |
| MCAM         | ENSG00000076706 | -1.01016263 | 3.7369E-05 |
| PTPRN2       | ENSG00000155093 | -1.53116471 | 3.7802E-05 |
| PDE4B        | ENSG00000184588 | -1.06541738 | 3.8361E-05 |
| BAIAP2-AS1   | ENSG00000226137 | -1.07003289 | 3.8548E-05 |
| PRELID3A     | ENSG00000141391 | 1.04421235  | 3.8625E-05 |

|            |                 |              |            |
|------------|-----------------|--------------|------------|
| NEURL1B    | ENSG00000214357 | -2.928723420 | 3.9009E-05 |
| GACAT2     | ENSG00000265962 | -1.013974789 | 4.0459E-05 |
| F2         | ENSG00000180210 | -1.678913700 | 4.0736E-05 |
| AC023632.6 | ENSG00000280123 | -1.062616466 | 4.083E-05  |
| ZNF792     | ENSG00000180884 | -1.164978367 | 4.0985E-05 |
| ATP6V1B1   | ENSG00000116039 | -1.874496077 | 4.2128E-05 |
| AC012181.1 | ENSG00000261114 | 1.42805374   | 4.2514E-05 |
| DUSP19     | ENSG00000162999 | -1.445169167 | 4.3228E-05 |
| AC008105.3 | ENSG00000267121 | -1.190613132 | 4.409E-05  |
| LRRN3      | ENSG00000173114 | -1.780637047 | 4.5849E-05 |
| LCE3D      | ENSG00000163202 | 3.00875709   | 4.5985E-05 |
| SCNN1A     | ENSG00000111319 | -1.245337893 | 4.63E-05   |
| LINC01433  | ENSG00000230176 | -1.544921739 | 4.7242E-05 |
| PDZK1      | ENSG00000174827 | -1.199239287 | 4.8671E-05 |
| SLC25A42   | ENSG00000181035 | -1.599536440 | 4.899E-05  |
| AC138811.2 | ENSG00000260342 | Inf          | 4.902E-05  |
| KRT14      | ENSG00000186847 | -1.642334768 | 5.0459E-05 |
| AC124067.4 | ENSG00000254290 | -2.502416672 | 5.1689E-05 |
| CERS4      | ENSG00000090661 | -1.340370430 | 5.2008E-05 |
| AC093297.2 | ENSG00000272335 | -1.022137077 | 5.4146E-05 |
| ASPHD2     | ENSG00000128203 | -1.329530950 | 5.4318E-05 |
| AC123595.2 | ENSG00000271762 | 2.09589052   | 5.4437E-05 |
| HIC2       | ENSG00000169635 | 1.06926738   | 5.5703E-05 |
| NGF        | ENSG00000134259 | 1.99909078   | 5.7415E-05 |
| CTH        | ENSG00000116761 | -1.556696047 | 5.7785E-05 |
| SGMS1-AS1  | ENSG00000226200 | -1.009788610 | 5.9815E-05 |
| CEBPA-AS1  | ENSG00000267296 | -1.569723388 | 6.3568E-05 |
| LINC00173  | ENSG00000196668 | -2.362260468 | 6.6275E-05 |
| SFRP4      | ENSG00000106483 | -2.138688213 | 6.8302E-05 |
| TNFRSF19   | ENSG00000127863 | 1.55970593   | 6.9101E-05 |
| LYPD3      | ENSG00000124466 | 1.66593013   | 7.5058E-05 |
| GATA2      | ENSG00000179348 | -1.165695746 | 7.6869E-05 |
| AC002524.1 | ENSG00000233247 | -1.958017877 | 7.8597E-05 |
| EHD1       | ENSG00000110047 | 1.17961901   | 7.9934E-05 |
| RF00096    | ENSG00000239148 | -1.027381624 | 8.1005E-05 |
| C1R        | ENSG00000159403 | -1.016738220 | 8.4182E-05 |
| FOXA3      | ENSG00000170608 | -2.044650978 | 8.6039E-05 |
| DNAAF3     | ENSG00000167646 | -1.165010984 | 8.6402E-05 |
| CAPN12     | ENSG00000182472 | -1.642676249 | 8.7335E-05 |
| MIR222HG   | ENSG00000270069 | 1.70988913   | 8.927E-05  |
| SPRY1      | ENSG00000164056 | -1.125401528 | 9.2284E-05 |
| ZNF165     | ENSG00000197279 | 1.55272035   | 9.3053E-05 |
| EDARADD    | ENSG00000186197 | -1.182914447 | 9.3287E-05 |
| OCEL1      | ENSG00000099330 | -1.273665849 | 9.3882E-05 |
| OTX1       | ENSG00000115507 | -1.054181022 | 9.5249E-05 |
| CYP2U1     | ENSG00000155016 | -1.310160147 | 9.9962E-05 |
| RARRES1    | ENSG00000118849 | -1.257244308 | 0.00010164 |
| GLIS3      | ENSG00000107249 | -1.072521656 | 0.00010891 |
| CKMT1B     | ENSG00000237289 | -1.213129598 | 0.00010946 |
| MKL2       | ENSG00000186260 | -1.008453913 | 0.00011104 |
| C3orf18    | ENSG00000088543 | -1.058064923 | 0.00011393 |
| NOV        | ENSG00000136999 | -1.187144264 | 0.00011658 |
| FRAT1      | ENSG00000165879 | -1.187956007 | 0.00012069 |
| CRYM-AS1   | ENSG00000189149 | 1.58926163   | 0.00013073 |
| KCNJ2      | ENSG00000123700 | -1.345986006 | 0.00013424 |
| TMOD1      | ENSG00000136842 | 1.0590703    | 0.00013458 |
| MT1X       | ENSG00000187193 | 1.36672152   | 0.00013518 |
| PAPLN      | ENSG00000100767 | -1.056904708 | 0.00013567 |

|              |                 |              |            |
|--------------|-----------------|--------------|------------|
| ANXA9        | ENSG00000143412 | -1.619868779 | 0.00013601 |
| PALM         | ENSG00000099864 | -1.344200937 | 0.00014002 |
| MICALL1      | ENSG00000100139 | 1.0302605    | 0.00014406 |
| MISP3        | ENSG00000141854 | -1.219134286 | 0.00014611 |
| SYDE2        | ENSG00000097096 | 1.04778884   | 0.00014683 |
| TMEM268      | ENSG00000157693 | 1.02663131   | 0.00014732 |
| TMEM151A     | ENSG00000179292 | -1.198946012 | 0.00014771 |
| HRASLS2      | ENSG00000133328 | -4.227822140 | 0.00014837 |
| NUDT11       | ENSG00000196368 | -1.043476497 | 0.00015216 |
| CTSH         | ENSG00000103811 | -1.002674245 | 0.00015991 |
| CFHR1        | ENSG00000244414 | -2.845023416 | 0.00016053 |
| BAAT         | ENSG00000136881 | -1.364226063 | 0.00016249 |
| BCL2A1       | ENSG00000140379 | 1.26749892   | 0.00016562 |
| AC090197.1   | ENSG00000253837 | 1.38779941   | 0.00017493 |
| AC092683.1   | ENSG00000230606 | 1.28196805   | 0.00017923 |
| AC106782.1   | ENSG00000258130 | -1.360104247 | 0.00018319 |
| TMEM263      | ENSG00000151135 | -1.232485555 | 0.00018541 |
| TRIM46       | ENSG00000163462 | -1.067535046 | 0.00018837 |
| AC008915.2   | ENSG00000260136 | 1.14455531   | 0.00019324 |
| RASA4        | ENSG00000105808 | -1.144451757 | 0.00020904 |
| HLA-DMA      | ENSG00000204257 | -1.471483025 | 0.00021073 |
| RNF185       | ENSG00000138942 | 1.35519785   | 0.00021754 |
| FAM111A      | ENSG00000166801 | -1.252238476 | 0.0002287  |
| PRKAR2B      | ENSG00000005249 | -1.296196648 | 0.00024048 |
| FTCDNL1      | ENSG00000226124 | -1.190445120 | 0.00024723 |
| KRT19        | ENSG00000171345 | 1.07625154   | 0.00025426 |
| MLXIPL       | ENSG00000009950 | -1.280685163 | 0.00026036 |
| S1PR5        | ENSG00000180739 | -2.538607020 | 0.00026252 |
| ACY3         | ENSG00000132744 | -2.271555326 | 0.00026976 |
| LRRRC37A17P  | ENSG00000263142 | -1.974978729 | 0.00027112 |
| VPS37D       | ENSG00000176428 | -1.126397939 | 0.00027372 |
| LRP12        | ENSG00000147650 | -2.045534758 | 0.0002742  |
| LINC02454    | ENSG00000256268 | 3.27539845   | 0.00029401 |
| LAT2         | ENSG00000086730 | 1.06646986   | 0.00032533 |
| IFNL4        | ENSG00000272395 | -2.090336237 | 0.00033645 |
| AC159540.2   | ENSG00000277701 | 1.43348662   | 0.00034518 |
| ARSI         | ENSG00000183876 | 1.09244597   | 0.0003783  |
| TCN1         | ENSG00000134827 | -2.738036684 | 0.00037932 |
| AP000523.1   | ENSG00000215270 | -1.229975169 | 0.00041102 |
| TM4SF19      | ENSG00000145107 | 1.94322426   | 0.00042097 |
| PRKCG        | ENSG00000126583 | -1.309522677 | 0.00042733 |
| ABLIM3       | ENSG00000173210 | 1.85875395   | 0.0004469  |
| AC103740.2   | ENSG00000259727 | 3.19379429   | 0.00045766 |
| C7orf55-LUC7 | ENSG00000269955 | Inf          | 0.00047532 |
| PPM1K        | ENSG00000163644 | -1.027503917 | 0.00048094 |
| PCYOX1L      | ENSG00000145882 | -1.045824262 | 0.00050166 |
| DPEP1        | ENSG00000015413 | -1.595097957 | 0.00051222 |
| AC211429.1   | ENSG00000242073 | 3.67210005   | 0.00051952 |
| AC100757.1   | ENSG00000273679 | -1.406236780 | 0.00053466 |
| AC073611.1   | ENSG00000257605 | 1.94031835   | 0.00054681 |
| AC068491.4   | ENSG00000279191 | 1.59410164   | 0.00056828 |
| FBXO2        | ENSG00000116661 | -1.116336027 | 0.00057115 |
| ZEB1         | ENSG00000148516 | -3.0532996   | 1.4379E-05 |
| CCL24        | ENSG00000106178 | -2.945302939 | 0.00057253 |
| KPNA7        | ENSG00000185467 | 2.03306561   | 0.00057445 |
| RAB30        | ENSG00000137502 | -1.062873325 | 0.00060273 |
| NRSN2        | ENSG00000125841 | -1.458847237 | 0.00060609 |
| LINC01942    | ENSG00000253428 | -2.759050438 | 0.00061012 |



|            |                 |              |            |
|------------|-----------------|--------------|------------|
| CFD        | ENSG00000197766 | -1.552124727 | 0.00065089 |
| DEFB1      | ENSG00000164825 | -2.716579844 | 0.00066097 |
| TUBA4B     | ENSG00000243910 | -2.707094697 | 0.00066174 |
| AL022238.4 | ENSG00000284431 | -2.436341307 | 0.0006639  |
| QPRT       | ENSG00000103485 | -2.245398707 | 0.00066781 |
| MAPK7      | ENSG00000166484 | 1.21593337   | 0.00067869 |
| LINC00313  | ENSG00000185186 | -1.347981799 | 0.00071651 |
| AC008687.6 | ENSG00000269706 | 4.7249395    | 0.0007443  |
| LGI3       | ENSG00000168481 | -1.544117447 | 0.00075833 |
| HOXC6      | ENSG00000197757 | -1.247535197 | 0.00076513 |
| MEG3       | ENSG00000214548 | 1.06056775   | 0.00077187 |
| RPPH1      | ENSG00000277209 | -1.796630629 | 0.00078504 |
| GDPD1      | ENSG00000153982 | -1.240984407 | 0.00079079 |
| LRRC8D     | ENSG00000171492 | -1.583116987 | 0.0008056  |
| RCBTB2     | ENSG00000136161 | 1.48839353   | 0.00080808 |
| DNLZ       | ENSG00000213221 | 1.11326596   | 0.00081412 |
| KLHDC1     | ENSG00000197776 | -1.776962367 | 0.00086119 |
| C3orf80    | ENSG00000180044 | -1.472111580 | 0.00086387 |
| GUCY2EP    | ENSG00000204529 | -1.913455009 | 0.00094794 |
| MIR193BHG  | ENSG00000262454 | -1.148980274 | 0.00094988 |
| STK38L     | ENSG00000211455 | 1.20109342   | 0.00095955 |
| SH3BP1     | ENSG00000100092 | -1.063376339 | 0.00096409 |
| EPCAM      | ENSG00000119888 | -1.805342762 | 0.00096748 |
| LINC00482  | ENSG00000185168 | -1.022107164 | 0.00097594 |
| TDG        | ENSG00000139372 | -1.118744836 | 0.00098932 |
| RIBC2      | ENSG00000128408 | -1.573684386 | 0.00099426 |
| DLG3       | ENSG00000082458 | -1.119106259 | 0.00100075 |
| CYS1       | ENSG00000205795 | -1.376609989 | 0.00101513 |
| LINC00488  | ENSG00000214381 | -1.187198059 | 0.00102011 |
| TOLLIP     | ENSG00000078902 | 1.00100453   | 0.00104817 |
| ARL14      | ENSG00000179674 | 1.26262204   | 0.00105793 |
| VIM        | ENSG00000026025 | 1.08494895   | 0.00109171 |
| IQCD       | ENSG00000166578 | -1.427327250 | 0.00110221 |
| AKR1C4     | ENSG00000198610 | -1.253214267 | 0.00114444 |
| AL137003.1 | ENSG00000229931 | 1.68957023   | 0.00117867 |
| UNC5CL     | ENSG00000124602 | -1.144534797 | 0.00118265 |
| TSKU       | ENSG00000182704 | -1.515257297 | 0.00126698 |
| TRAPPC2B   | ENSG00000256060 | 1.22103634   | 0.00128871 |
| KCNJ2-AS1  | ENSG00000267365 | -1.934962289 | 0.00133556 |
| HAPLN3     | ENSG00000140511 | -1.205301597 | 0.00136971 |
| RDH5       | ENSG00000135437 | -1.423327517 | 0.0014005  |
| AC005670.2 | ENSG00000262633 | Inf          | 0.00140908 |
| LINC02313  | ENSG00000258474 | -1.778816862 | 0.00148346 |
| IFNL3P1    | ENSG00000268510 | -1.744340207 | 0.00149682 |
| AL049794.1 | ENSG00000273998 | 4.64343529   | 0.00151068 |
| RGS14      | ENSG00000169220 | -1.241838886 | 0.00151511 |
| AGMO       | ENSG00000187546 | -1.529143150 | 0.0015188  |
| ADAM19     | ENSG00000135074 | -1.024068430 | 0.00153947 |
| NEURL2     | ENSG00000124257 | -1.621945056 | 0.00154041 |
| ELF3-AS1   | ENSG00000234678 | -1.097924409 | 0.00154572 |
| LCA5       | ENSG00000135338 | -1.228950139 | 0.00159498 |
| TMEM81     | ENSG00000174529 | -1.493214637 | 0.00165634 |
| AC090192.2 | ENSG00000253227 | 1.46954311   | 0.001659   |
| PRRT1B     | ENSG00000283526 | -1.967411186 | 0.00168957 |
| PAOX       | ENSG00000148832 | -1.161418590 | 0.00173655 |
| LINC02057  | ENSG00000249279 | 1.56078805   | 0.00175871 |
| CARD8-AS1  | ENSG00000268001 | 1.68084664   | 0.00178278 |
| PPARA      | ENSG00000186951 | -1.389869439 | 0.00179578 |

|             |                 |             |            |
|-------------|-----------------|-------------|------------|
| KRT80       | ENSG00000167767 | 1.15943619  | 0.00186619 |
| AP000275.2  | ENSG00000265590 | -5.34284540 | 0.00196245 |
| SPATA32     | ENSG00000184361 | -1.41367401 | 0.00205648 |
| NCCRP1      | ENSG00000188505 | -1.55535275 | 0.00211339 |
| NALT1       | ENSG00000237886 | -1.70035758 | 0.00220182 |
| LINC02210   | ENSG00000204650 | -1.23849971 | 0.00225413 |
| AL645608.9  | ENSG00000273443 | 1.32860651  | 0.00230035 |
| PCDHAC1     | ENSG00000248383 | -1.03002999 | 0.00233761 |
| BCL2L2      | ENSG00000129473 | 1.86869106  | 0.00236269 |
| DEPTOR      | ENSG00000155792 | -1.24767561 | 0.00236897 |
| TMEM75      | ENSG00000280055 | 1.72372774  | 0.00243512 |
| AC005020.2  | ENSG00000272647 | -2.26659779 | 0.00244391 |
| PRRT2       | ENSG00000167371 | -1.47185906 | 0.00244929 |
| ANO1        | ENSG00000131620 | 1.0044024   | 0.00246232 |
| GPR1        | ENSG00000183671 | -1.41466367 | 0.00246835 |
| AC068888.1  | ENSG00000257337 | -1.13021109 | 0.00253334 |
| SLX1A-SULT1 | ENSG00000213599 | -1.13340936 | 0.00253709 |
| LGALS2      | ENSG00000100079 | -3.38312438 | 0.00256837 |
| TLE6        | ENSG00000104953 | -1.22890918 | 0.00257399 |
| CCDC184     | ENSG00000177875 | -1.05623772 | 0.00262533 |
| FBXO27      | ENSG00000161243 | 1.14745511  | 0.00271873 |
| DLG5-AS1    | ENSG00000233871 | -1.67824330 | 0.0027191  |
| SMPD1       | ENSG00000166311 | 1.14508133  | 0.00272486 |
| AC006486.1  | ENSG00000268643 | 5.29866784  | 0.00279976 |
| HBQ1        | ENSG00000086506 | -1.09261127 | 0.00282226 |
| PRPS2       | ENSG00000101911 | -1.08062661 | 0.00283251 |
| EGFR-AS1    | ENSG00000224057 | 1.51701069  | 0.00283531 |
| CHST13      | ENSG00000180767 | -1.55159688 | 0.00283722 |
| RGL3        | ENSG00000205517 | -1.15466923 | 0.00285936 |
| PSCA        | ENSG00000167653 | 1.37338022  | 0.00295394 |
| CXXC5       | ENSG00000171604 | -1.56205021 | 0.00300943 |
| UGT1A2P     | ENSG00000228445 | -1.51292058 | 0.00301896 |
| RAB26       | ENSG00000167964 | -1.66142163 | 0.00303734 |
| AL139246.5  | ENSG00000272449 | -1.62376705 | 0.00316746 |
| AL732372.3  | ENSG00000250575 | 1.12860782  | 0.00328434 |
| RCOR2       | ENSG00000167771 | -1.37693772 | 0.00335733 |
| RARB        | ENSG00000077092 | -1.55277790 | 0.00343633 |
| AC017116.1  | ENSG00000239775 | -3.32439887 | 0.00345361 |
| AL356019.2  | ENSG00000258768 | -1.21381676 | 0.00348052 |
| AC096887.2  | ENSG00000280417 | -1.60279915 | 0.00356358 |
| AC133644.2  | ENSG00000273445 | -1.72436650 | 0.00366967 |
| AP002807.1  | ENSG00000255031 | -1.20367606 | 0.0037196  |
| AC112220.4  | ENSG00000271643 | 1.2431675   | 0.00375071 |
| RPL13AP20   | ENSG00000234498 | 1.22098717  | 0.00404749 |
| ZNF461      | ENSG00000197808 | 1.10590086  | 0.00409941 |
| AL807757.2  | ENSG00000236095 | -1.53894170 | 0.00415806 |
| RTP4        | ENSG00000136514 | -2.20782445 | 0.00418934 |
| RASAL2-AS1  | ENSG00000224687 | 1.27252442  | 0.00423591 |
| MAP1LC3B2   | ENSG00000258102 | 1.07154764  | 0.00426224 |
| GAPLINC     | ENSG00000266835 | -2.33201158 | 0.00428684 |
| TTLL11      | ENSG00000175764 | 1.00576922  | 0.00455302 |
| MGMT        | ENSG00000170430 | -1.31149744 | 0.00456516 |
| AC011676.5  | ENSG00000280035 | -1.54931581 | 0.00462774 |
| ZNF223      | ENSG00000178386 | 1.74685871  | 0.00481843 |
| AC073109.1  | ENSG00000235920 | -2.06842924 | 0.00488671 |
| PRR22       | ENSG00000212123 | 1.07160005  | 0.00500092 |
| GPATCH2L    | ENSG00000089916 | 1.26956965  | 0.00502135 |
| KCNG3       | ENSG00000171126 | -1.13180972 | 0.00507916 |

|            |                 |              |            |
|------------|-----------------|--------------|------------|
| AC013444.2 | ENSG00000270390 | -1.805638360 | 0.00511882 |
| AC108463.3 | ENSG00000271590 | 1.92379091   | 0.00515289 |
| AL133367.1 | ENSG00000260285 | -1.123501522 | 0.00521242 |
| AC107021.2 | ENSG00000261051 | 1.17906385   | 0.00558881 |
| S100A9     | ENSG00000163220 | -1.872080592 | 0.00565602 |
| DMBX1      | ENSG00000197587 | -1.169979710 | 0.00568243 |
| GSEC       | ENSG00000280832 | -1.033996176 | 0.00596872 |
| BST2       | ENSG00000130303 | -1.977927495 | 0.00597992 |
| LINC01468  | ENSG00000231131 | -1.919811043 | 0.00598639 |
| ETNK2      | ENSG00000143845 | -1.406861857 | 0.00606266 |
| IDH1-AS1   | ENSG00000231908 | -1.966636159 | 0.00616831 |
| GJB3       | ENSG00000188910 | 1.37942019   | 0.00619157 |
| AL138759.1 | ENSG00000244332 | -1.162791755 | 0.00637951 |
| AC073896.1 | ENSG00000144785 | -1.559357358 | 0.00640117 |
| AC067930.4 | ENSG00000254859 | -1.353630103 | 0.00644069 |
| AC126474.2 | ENSG00000280088 | -1.064938452 | 0.006597   |
| AL161668.1 | ENSG00000178107 | -3.344409367 | 0.00667972 |
| SOCS2      | ENSG00000120833 | 1.52334551   | 0.00704603 |
| SLC6A6     | ENSG00000131389 | 1.13169718   | 0.00742194 |
| TOB1       | ENSG00000141232 | -1.000094697 | 0.00767668 |
| TMEM169    | ENSG00000163449 | -1.458462006 | 0.00795592 |
| ADM5       | ENSG00000224420 | 1.26246698   | 0.00802725 |
| AL133355.1 | ENSG00000260461 | -1.040645023 | 0.00815493 |
| AC004231.3 | ENSG00000265359 | -Inf         | 0.00841165 |
| OSER1-AS1  | ENSG00000223891 | 1.44927845   | 0.00847864 |
| ZNF181     | ENSG00000197841 | 1.02013238   | 0.0084958  |
| CCDC96     | ENSG00000173013 | 1.11245177   | 0.00850062 |
| AC105052.1 | ENSG00000205236 | 1.10389966   | 0.00859647 |
| AC008537.2 | ENSG00000269843 | -1.459368894 | 0.00886824 |
| RGCC       | ENSG00000102760 | -2.431661652 | 0.00897983 |
| RCN3       | ENSG00000142552 | -1.330539076 | 0.00935683 |
| HOXA2      | ENSG00000105996 | -1.256966547 | 0.00937695 |
| LINC01843  | ENSG00000251169 | -1.058866674 | 0.00963807 |
| HSPA2      | ENSG00000126803 | -1.363676917 | 0.0099745  |
| LTB        | ENSG00000227507 | -1.015225209 | 0.01009086 |
| AC026464.3 | ENSG00000260371 | -3.660168720 | 0.01018295 |
| FCGRT      | ENSG00000104870 | -1.076168964 | 0.01020522 |
| AC073569.2 | ENSG00000258048 | -1.589532457 | 0.01024692 |
| DUSP9      | ENSG00000130829 | -1.297199615 | 0.01042075 |
| CDKL2      | ENSG00000138769 | 1.05268738   | 0.01042961 |
| CNFN       | ENSG00000105427 | -1.156478067 | 0.01053179 |
| SLC35A5    | ENSG00000138459 | -1.805028500 | 0.01061123 |
| DUX4L9     | ENSG00000224807 | -1.573189037 | 0.01064809 |
| BDKRB2     | ENSG00000168398 | -1.012734942 | 0.0107397  |
| LINC02298  | ENSG00000257556 | -1.217662232 | 0.01095472 |
| AL137802.2 | ENSG00000261135 | -1.998399822 | 0.01111683 |
| AC087632.1 | ENSG00000259316 | -1.109195782 | 0.01114417 |
| AC110285.2 | ENSG00000262877 | -1.302105495 | 0.01115803 |
| C20orf141  | ENSG00000258713 | -1.696640970 | 0.0112556  |
| PWAR5      | ENSG00000279192 | -1.080738048 | 0.01156233 |
| TNPO1P3    | ENSG00000229586 | 1.25879856   | 0.01156572 |
| AC008105.2 | ENSG00000233483 | -1.255468210 | 0.01165155 |
| RRAD       | ENSG00000166592 | 1.19760882   | 0.01234759 |
| AC023024.2 | ENSG00000279970 | -1.011730825 | 0.01248529 |
| MAST4-AS1  | ENSG00000229666 | -2.038977094 | 0.01251559 |
| UPK3BL2    | ENSG00000284981 | 5.13237232   | 0.01278894 |
| P2RY11     | ENSG00000244165 | 1.15633271   | 0.01301377 |
| EFNA2      | ENSG00000099617 | -2.198260912 | 0.013169   |

|            |                 |              |            |
|------------|-----------------|--------------|------------|
| AC009283.1 | ENSG00000273576 | -1.074826746 | 0.01336757 |
| LINC01474  | ENSG00000236849 | -1.855540264 | 0.01350842 |
| AC011466.3 | ENSG00000269534 | -2.238662267 | 0.01352024 |
| AC137932.2 | ENSG00000261253 | 1.40100666   | 0.01372448 |
| SCG5       | ENSG00000166922 | 1.04187735   | 0.0138613  |
| KRT20      | ENSG00000171431 | -1.322524838 | 0.01386452 |
| AL512844.1 | ENSG00000232952 | 1.63726698   | 0.01402281 |
| RAP1AP     | ENSG00000258769 | Inf          | 0.01442475 |
| AC112220.2 | ENSG00000271020 | 1.17482619   | 0.01447198 |
| RN7SL23P   | ENSG00000240823 | -Inf         | 0.01456708 |
| MT1F       | ENSG00000198417 | 1.52505538   | 0.01458042 |
| AC006538.1 | ENSG00000261342 | -2.104661139 | 0.01470407 |
| RN7SL5P    | ENSG00000265735 | 1.09435516   | 0.01510819 |
| AC027117.1 | ENSG00000253671 | -1.694219333 | 0.01559665 |
| AC090587.2 | ENSG00000229368 | -1.580297545 | 0.01565483 |
| OVGP1      | ENSG00000085465 | -1.283034724 | 0.01700115 |
| NIPSNAP3B  | ENSG00000165028 | -1.083932107 | 0.01710129 |
| AC027702.1 | ENSG00000260588 | 1.14626182   | 0.01774658 |
| HOXD11     | ENSG00000128713 | -1.324612356 | 0.01781696 |
| FLVCR1-AS1 | ENSG00000198468 | -1.032093446 | 0.01781709 |
| CLDN12     | ENSG00000157224 | 1.11460992   | 0.01819117 |
| AC011448.1 | ENSG00000258674 | 1.45748492   | 0.01860489 |
| CX3CL1     | ENSG00000006210 | -1.697570834 | 0.01864159 |
| AC005730.2 | ENSG00000261033 | 2.12642028   | 0.01870496 |
| TSPAN12    | ENSG00000106025 | -1.059556370 | 0.01874237 |
| AC002467.1 | ENSG00000241764 | 1.21491302   | 0.01894269 |
| AC004803.1 | ENSG00000250132 | -1.147581138 | 0.01908662 |
| AP001574.1 | ENSG00000253217 | -1.859214407 | 0.01912367 |
| AASDHPPT   | ENSG00000149313 | -1.197370616 | 0.01951517 |
| RNF103-CHM | ENSG00000249884 | 2.56304021   | 0.02018159 |
| BASP1-AS1  | ENSG00000215196 | -1.049922250 | 0.02077096 |
| AC018690.1 | ENSG00000273306 | 1.41597461   | 0.02151948 |
| AC011445.1 | ENSG00000268262 | -1.418183170 | 0.02176842 |
| KRT83      | ENSG00000170523 | -1.211186044 | 0.02224344 |
| AD000671.1 | ENSG00000188223 | Inf          | 0.02240402 |
| AC131212.2 | ENSG00000279700 | -1.523162650 | 0.02276161 |
| AC008083.2 | ENSG00000258181 | -1.550481133 | 0.02303335 |
| AC012181.2 | ENSG00000261270 | 1.2836998    | 0.02403276 |
| AC126544.1 | ENSG00000280022 | -2.610499802 | 0.02434657 |
| SERPINB3   | ENSG00000057149 | -1.005549507 | 0.02487375 |
| AC004918.1 | ENSG00000244701 | -1.012413403 | 0.02499296 |
| TRIM74     | ENSG00000155428 | -1.343219857 | 0.02520691 |
| AL139289.1 | ENSG00000229431 | 2.35286166   | 0.02528089 |
| AC113404.3 | ENSG00000254893 | -1.246584528 | 0.02552758 |
| MALAT1     | ENSG00000251562 | -1.381682720 | 0.02680626 |
| SP2-AS1    | ENSG00000234494 | -1.283467375 | 0.02701884 |
| BCRP3      | ENSG00000215481 | -1.475439653 | 0.02792913 |
| FRMD6-AS1  | ENSG00000273888 | 1.06236934   | 0.02797896 |
| RPS10-NUDT | ENSG00000270800 | 4.40335956   | 0.02810169 |
| PTGER2     | ENSG00000125384 | -1.020118932 | 0.02812332 |
| DGCR10     | ENSG00000273164 | -3.624256112 | 0.02874729 |
| VPS33B     | ENSG00000184056 | -1.340632662 | 0.02897822 |
| UPK3BL1    | ENSG00000267368 | -4.794030049 | 0.02922971 |
| LINC01970  | ENSG00000265692 | -1.509407748 | 0.0295659  |
| ZNF830     | ENSG00000198783 | 1.00060339   | 0.02985294 |
| AL356056.2 | ENSG00000231187 | -1.181853197 | 0.03019431 |
| AC010809.2 | ENSG00000259408 | 1.69013432   | 0.03103661 |
| PCOTH      | ENSG00000205861 | 1.92724929   | 0.03121287 |

|            |                 |              |            |
|------------|-----------------|--------------|------------|
| FAM35BP    | ENSG00000165874 | -1.343902773 | 0.03138343 |
| AC026368.1 | ENSG00000277840 | -1.205789026 | 0.03165312 |
| DCST1-AS1  | ENSG00000232093 | -1.155446070 | 0.03204717 |
| ZNF84      | ENSG00000198040 | 2.08124395   | 0.0331159  |
| RPL23AP95  | ENSG00000236848 | -Inf         | 0.03348931 |
| LINC01220  | ENSG00000259687 | -2.16964598  | 0.03401703 |
| AL035563.1 | ENSG00000273148 | -1.207577613 | 0.03417483 |
| AC243732.1 | ENSG00000274756 | -1.280431213 | 0.034493   |
| AC245033.3 | ENSG00000278603 | -1.219054097 | 0.03458549 |
| PPP1R18    | ENSG00000146112 | 1.00583978   | 0.03520074 |
| AC135279.1 | ENSG00000255566 | 2.13080279   | 0.03559461 |
| TFRC       | ENSG00000072274 | -1.252909114 | 0.03637297 |
| ATP2C2-AS1 | ENSG00000261286 | 1.2320736    | 0.03660579 |
| ELOCP19    | ENSG00000241975 | 1.76198924   | 0.03698131 |
| SPANXB1    | ENSG00000227234 | 1.69157768   | 0.03707248 |
| AL627309.6 | ENSG00000268903 | 1.86603213   | 0.03710577 |
| CBLL1      | ENSG00000105879 | 1.63820083   | 0.03759458 |
| AC067838.1 | ENSG00000272338 | -2.807398705 | 0.03837697 |
| TTPAL      | ENSG00000124120 | 2.35399307   | 0.03844685 |
| AC105052.2 | ENSG00000213385 | 1.4525555    | 0.03873709 |
| AC098487.1 | ENSG00000248161 | -1.040444016 | 0.03877655 |
| CHCHD4P3   | ENSG00000236156 | 1.75757669   | 0.03881974 |
| CLEC11A    | ENSG00000105472 | -1.33204962  | 0.03925539 |
| ASB1       | ENSG00000065802 | 1.9721487    | 0.03932045 |
| TUT1       | ENSG00000149016 | -1.08660364  | 0.03995411 |
| AP000695.2 | ENSG00000233818 | 1.14602065   | 0.04035844 |
| AC017100.1 | ENSG00000259985 | 1.06240854   | 0.04064011 |
| AD000671.3 | ENSG00000267439 | 1.14403154   | 0.04112137 |
| AC087269.1 | ENSG00000254367 | -1.182379847 | 0.04127544 |
| HIVEP1     | ENSG00000095951 | 1.35474486   | 0.04130847 |
| KATNBL1P6  | ENSG00000228283 | 1.06418086   | 0.04139572 |
| LINC01564  | ENSG00000235899 | 1.20967425   | 0.04152259 |
| PAN3-AS1   | ENSG00000261485 | -1.267676575 | 0.04193577 |
| AC233300.1 | ENSG00000279155 | 1.68473217   | 0.04242816 |
| GCHFR      | ENSG00000137880 | -1.797638992 | 0.04274547 |
| AC004231.1 | ENSG00000234477 | -1.980830726 | 0.04317504 |
| USP49      | ENSG00000164663 | -1.031883522 | 0.04366956 |
| AC132942.1 | ENSG00000240898 | 1.69054137   | 0.04534162 |
| GATA3      | ENSG00000107485 | 1.11164138   | 0.04538594 |
| AC027309.2 | ENSG00000253683 | -1.192462855 | 0.04595893 |
| AC010323.1 | ENSG00000167774 | -Inf         | 0.04596124 |
| AL158163.2 | ENSG00000278601 | 1.51443133   | 0.04603075 |
| AC133681.1 | ENSG00000239620 | 2.84464934   | 0.04636847 |
| TMEM250    | ENSG00000238227 | 2.44735616   | 0.04678088 |
| AL133410.1 | ENSG00000227388 | 1.3616287    | 0.04692054 |
| CYP2F2P    | ENSG00000237118 | -1.268165682 | 0.04789333 |
| PLS3-AS1   | ENSG00000271826 | -1.122496532 | 0.04896578 |
| AC040160.1 | ENSG00000262691 | -1.018119855 | 0.04918384 |

---

**Supplementary Table 5**

| <b>Relationship between LINC01977 expression and clinicopathological parameters of LUAD</b> |                     |                             |                       |                  |
|---------------------------------------------------------------------------------------------|---------------------|-----------------------------|-----------------------|------------------|
| <b>Variable</b>                                                                             | <b>No. patients</b> | <b>LINC01977 expression</b> |                       | <b>P value</b>   |
|                                                                                             |                     | <b>High expression</b>      | <b>Low expression</b> |                  |
| <b>Age (yr)</b>                                                                             |                     |                             |                       |                  |
| > 62                                                                                        | 109                 | 53                          | 56                    | 0.669            |
| ≤62                                                                                         | 77                  | 35                          | 42                    |                  |
| <b>Sex</b>                                                                                  |                     |                             |                       |                  |
| Female                                                                                      | 86                  | 43                          | 43                    | 0.496            |
| Male                                                                                        | 100                 | 45                          | 55                    |                  |
| <b>Smoking</b>                                                                              |                     |                             |                       |                  |
| Yes/Ever                                                                                    | 98                  | 54                          | 44                    | 0.395            |
| Never                                                                                       | 88                  | 43                          | 45                    |                  |
| <b>Clinical stage</b>                                                                       |                     |                             |                       |                  |
| Early (I+IIA)                                                                               | 91                  | 45                          | 46                    | <b>0.008</b>     |
| Advanced (IIB+III)                                                                          | 95                  | 29                          | 66                    |                  |
| <b>pT status</b>                                                                            |                     |                             |                       |                  |
| T1-T2                                                                                       | 174                 | 84                          | 90                    | 0.482            |
| T3-T4                                                                                       | 12                  | 4                           | 8                     |                  |
| <b>Lymph node metastasis</b>                                                                |                     |                             |                       |                  |
| No metastasis (N0)                                                                          | 91                  | 59                          | 32                    | <b>&lt;0.001</b> |
| Metastasis (N1+N2)                                                                          | 95                  | 29                          | 66                    |                  |

**Supplementary Table 6**

|           | DNA sequence                                                                                                                                                                                                                                                                                                                                                                                                                                                                                                                                                                                                                                                                                                                                                                                                                                                                                                                                | Location                |
|-----------|---------------------------------------------------------------------------------------------------------------------------------------------------------------------------------------------------------------------------------------------------------------------------------------------------------------------------------------------------------------------------------------------------------------------------------------------------------------------------------------------------------------------------------------------------------------------------------------------------------------------------------------------------------------------------------------------------------------------------------------------------------------------------------------------------------------------------------------------------------------------------------------------------------------------------------------------|-------------------------|
| <b>E1</b> | ccaccacactcccaccacagtcagctcccagaatcaagctcatcaggtctagctctcct<br>ccctgcaggcagagctcgcaggactgtgccagctagggccacgcccagcctcaagcc<br>ccatgcccagccactctgagctctctgtctgacttacataagccatgctatgatggtttaa<br>atgtctcctgaagttcacgtgtgaaaacttattctgccacaggtatgagaagtgggccta<br>acaaagtaatgaggtcatgagagctgcccctcatgaatagattaatgtagttattgaggagtg<br>ggttcattatcacgagggtgggttg                                                                                                                                                                                                                                                                                                                                                                                                                                                                                                                                                                                   | chr17:79460389-79460729 |
| <b>E2</b> | tacattgaagtcctaacccttagctagtagtgaccgtattggagataggacccttaccag<br>gccatattgggtggcctcatccactctgaccagtgctcttaagagaagaagattaggacac<br>agacatgcacagatcaagggcggccatgtgaggacataaggagaagatgaccatctaca<br>agccaaagagaagcctcaaggaaccaatgtgccaacagcttgatcttagactctggcc<br>tcttgaattttgagaaaattaacctctgtgtgtgagccccaggctgaggggtccaccatggc<br>agcccaagccgaccacacacctccacatctcatgaccacctccattctcaagcgagga<br>cactgcccctgggtctgtgtgagtgagcaggtattcaaacgtgacaaagttctgtgactgac<br>ctgtgtggcctctataaccggcacttctcaaacatctgtgtggaaggattcattggttatttccaat<br>tcattctggacctacattttgtttctttgtttttgagacagggctcactatgctgccagctga<br>tcicaaacaccagggtcaaccaatctccacctcagcctcctgagtagttgaagtgacaa<br>gcccttactttgttttagaaaactataaaaatagaatcactagaaaaatggaataaagaag<br>gcatacaaaacacaaagccagggtcttaacgattagactcatcagacctaaaacgactcct<br>tcaaatgactaaaagattcctaatgcttaattcagcttctgtactcagttgcagggatcaggagc<br>agcacctcacgggctggcaccatccacagacctcatttgagtagctgagatagggtcat | chr17:79472376-79473272 |
| <b>E3</b> | gggaggtggggcagggtactggggcaggatgggatgtggaaggtggggaggg<br>gtacagaggggtgggaggtggggaaagggtactggggcaggatgggggtcaggaag<br>gtgggaatggaatgcatgggacaggcacaggctacataaagggtggtggggcagaggggtg<br>cagatggaggaggtggggagagggatgacagggtagggcacggggcaggggaggg<br>gtgcagacatccacagctcgggtcaggtgtagggtggcagaaggtggtgggggttaggc<br>ggtgagcggggtggaggttaaggcagaggccctgtggcagggacctgcaggccggg<br>accctgcaggcctccagcctggcacagcctgagcagtgccagcgtggcagatgggaac<br>gtgcagaacatgcagaagcatggcccctggttaataagattaggatgtgaacggccgaca<br>tgttctccgagactggctgtatgccacaatggaggggactgcgacctaatagaatgctgaa<br>cttttgaaagtgagcaaatggagagagtcagagttggggactgagagctcccctctcgg<br>gctggaggcc                                                                                                                                                                                                                                                                                         | chr17:79495539-79496152 |
| <b>E4</b> | tgcttaattactccaaccacaacagtgatgtgtgccatcagccagacaggacaaaaaac<br>ggttaggagatccactctgattagcctgagagactgtctctgggacagagtcagatcagg<br>gtggccaggagtggtgagctgtgtctccctgaatccccccaccactggcaccaccag<br>aaattcacacaggagtttaaacagcaacacacaacaataataatctaccagttgttcttt<br>cctaaaatccagtcactggacagagtaccaccccataccgaagaaccgaagagcagaa<br>ccagatcacagagagcccagcaaccccggagcaatgctggggaacatctgccctttca<br>gggaccattggtacagagcccagtgcccactgtgggtgaggagccacttctaatggcaa<br>aagtgaagtaataaggaacagttccatgtagaatgcagccaggaggtggtgggagag<br>ggcct ggggtcagggggcctgg                                                                                                                                                                                                                                                                                                                                                                                                 | chr17:79483969-79484486 |
| <b>E5</b> | gggaggtggggcagggtactggggcaggatgggatgtggaaggtggggaggg<br>gtacagaggggtgggaggtggggaaagggtactggggcaggatgggggtcaggaag<br>gtgggaatggaatgcatgggacaggcacaggctacataaagggtggtggggcagaggggtg<br>cagatggaggaggtggggagagggatgacagggtagggcacggggcaggggaggg<br>gtgcagacatccacagctcgggtcaggtgtagggtggcagaaggtggtgggggttaggc<br>ggtgagcggggtggaggttaaggcagaggccctgtggcagggacctgcaggccggg<br>accctgcaggcctccagcctggcacagcctgagcagtgccagcgtggcagatgggaac<br>gtgcagaacatgcagaagcatggcccctggttaataagattaggatgtgaacggccgaca<br>tgttctccgagactggctgtatgccacaatggaggggactgcgacctaatagaatgctgaa<br>cttttgaaagtgagcaaatggagagagtcagagttggggactgagagctcccctctcgg<br>gctggaggcc                                                                                                                                                                                                                                                                                         | chr17:79495539-79496152 |
| <b>E6</b> | gacaggccattcactggcgggctcagccgccctgccacacctccacatgtccagcgga<br>aggtccagaccctcatctcgtggccagagaggctggtgtctgcagccctcaggcccttc<br>tcctgctgtaaaagcctcacagctaccaagaagagatgtccaacagctccaggaaacc<br>tgagtcactgggtgtgggggaggccactttgtccgagctccaccctctgcctcctc                                                                                                                                                                                                                                                                                                                                                                                                                                                                                                                                                                                                                                                                                         | chr17:79501268-79501513 |

**Supplementary Table 7. Cloning primers, RACE primers and lncRNA ASO sequences**

| <b>Cloning primers</b>      |                                                   |
|-----------------------------|---------------------------------------------------|
| LINC01977(2791)             | Primer-F: AATTTTCCACTGTCTCTCAGTATCC               |
|                             | Primer-R: TTTTTTTTTTTTTTAGAGGACAAAGCACA           |
| LINC01977(2295)             | Primer-F: GCAGAAGGAAGAGAGCCTT                     |
|                             | Primer-R: TTTTTTTTTTTTTTAGAGGACAAAGCACAC          |
| LINC01977(1799)             | Primer-F: CGATCTCCTGACCTCGTG                      |
|                             | Primer-R: TTTTTTTTTTTCACAGAGGACAAAGCA             |
| LINC01977(1299)             | Primer-F: GGTGGGAGAGTCGGAGT                       |
|                             | Primer-R: TTTTTTTTTTTCACAGAGGACAAAGCA             |
| LINC01977(799)              | Primer-F: GCCGTGTCATTTCCGGAGG                     |
|                             | Primer-R: TTTTTTTTTTTCACAGAGGACAAAGCA             |
| LINC01977(299)              | Primer-F: ACAGACACGCACACGCA                       |
|                             | Primer-R: TTTTTTTTTTTCACAGAGGACAAAGCA             |
| Enhancer-1                  | Primer-F: CCACCACACTCCCACCACAG                    |
|                             | Primer-R: CAAACCCACCCTCGTGATAATGA                 |
| Enhancer-2                  | Primer-F: TACATTGAAGTCCTAACCCCTAGTACG             |
|                             | Primer-R: ATGACCCATATCTCAGCTACTCAAAGT             |
| Enhancer-4                  | Primer-F:<br>TGCTTAATTTACTCCAACCCAAACAGTGTATGTGTG |
|                             | Primer-R: CCCAGGCCCTGCACC                         |
| Enhancer-6                  | Primer-F: GACAGGCCCATTCCTGGGC                     |
|                             | Primer-R: GAGGAGGCAGAGGGTGGGA                     |
| ZEB1-P(0-100)               | Primer-F: GAGCTGGAAAGTTTTTTTTTTCCTTTCT            |
|                             | Primer-R: ACCGAATCAGGTCATAGACTATGG                |
| ZEB1-P(300-400)             | Primer-F: AGACATAATGTATAGCAAAGAATATTTACAGT        |
|                             | Primer-R: TTTTCTCTCCCACATTTTCTTGGG                |
| ZEB1-P(1200-1300)           | Primer-F: AGGCTGCTGGCAAGCGG                       |
|                             | Primer-R: TGGTTTCCCCCAAGCGAACC                    |
| ZEB1-P(1400-1500)           | Primer-F: CCTCATCAAGGGAAGTCCCG                    |
|                             | Primer-R: GGCTACCATCAGTCCCACGC                    |
| <b>RACE primers</b>         |                                                   |
| 5' RACE                     | Primer-R1: CTGCCAACAAGTCTGGGGAGAGAAGAGAGT         |
|                             | Primer-R2: CGAGCTGAGAAATCCAGGGAAGACGAA            |
| 3' RACE                     | Primer-F1: CCCACCCCAAGAGGCTGTCTAACG               |
|                             | Primer-F2: GGGAAACAATGAGAAACCAGATACCATGGA         |
| <b>lncRNA ASO sequences</b> |                                                   |
| LINC01977-ASO-1             | TCACCCAGATGGAGTTTCAA                              |
| LINC01977-ASO-2             | GAGCGTAGAGCCGTGTCATT                              |
| LINC01977-ASO-3             | GCCTTATCCAAACAGTTCAC                              |
| <b>sgRNA sequences</b>      |                                                   |
| CREBBP sg#1                 | GCGTCCACAGCAATATCCAA                              |



|             |                      |
|-------------|----------------------|
| CREBBP sg#2 | AGACCGCACCTGGTTACTAA |
| CREBBP sg#3 | AGCTCTAAAGGATCGCCGCA |
| EP300 sg#1  | GTACGACTAGGTACAGGCGA |
| EP300 sg#2  | ATACGAGGCCCATAGCCCAT |
| EP300 sg#3  | CGACCATCCATCAGATCGCA |
| SMAD3 sg#1  | TGCGGCTCTACTACATCGGA |
| SMAD3 sg#2  | GCTCTACTACATCGGAGGGG |
| SMAD3 sg#3  | GCGGCTCTACTACATCGGAG |

The DNA fragments of enhancer-3, -5 and LINC01977 promoter region were synthesized and cloned into the pLG3 plasmid. P refers to promoter region. The sgRNA used in this study was prepared by in vitro transcription from

**Supplementary Table 8. qRT-PCR primers used in this study**

| <b>Genes</b>       | <b>Primers sequences</b>           |
|--------------------|------------------------------------|
| LINC01977          | Primer-F: TGACAGTGTAACAGGTATTTCGCC |
|                    | Primer-R: GGCTCTACGCTCATTCCCA      |
| GAPDH              | Primer-F: CCATGGGGAAGGTGAAGGTC     |
|                    | Primer-R: GAAGGGGTCATTGATGGCAAC    |
| ACTB               | Primer-F: ACCTTCTACAATGAGCTGCG     |
|                    | Primer-R: CCTGGATAGCAACGTACATGG    |
| U6                 | Primer-F: ATTGGAACGATACAGAGAAGATT  |
|                    | Primer-R: GGAACGCTTCACGAATTTG      |
| PAI-1              | Primer-F: AATCAGACGGCAGCACTGTCT    |
|                    | Primer-R: GGCAGTTCCAGGATGTCGTAGT   |
| COL1A1             | Primer-F: TCCGACCTCTCTCCTCTGAA     |
|                    | Primer-R: AGGGGGAAAACTGCTTTGT      |
| Vimentin           | Primer-F: TCGCCATCAGTAGAAGGTAGCA   |
|                    | Primer-R: CTCAATGTCAAGGGCCATCT     |
| E-cadherin         | Primer-F: TGGAGAGACACTGCCAACTG     |
|                    | Primer-R: TTAGGGCTGTGTACGTGCTG     |
| N-cadherin         | Primer-F: GGATCAACCCCATACACCAG     |
|                    | Primer-R: TGGTTTGACCACGGTGACTA     |
| Snail              | Primer-F: TTCTCACTGCCATGGAATTCC    |
|                    | Primer-R: GCAGAGGACACAGAACCAGAAA   |
| WBP2               | Primer-F: TCAAGCAGCCCGTATTTGGTG    |
|                    | Primer-R: GCCGTGAAAGTCAACTTGTAGGA  |
| HSPA9              | Primer-F: GGAAGGTAAACAAGCAAAGGTGC  |
|                    | Primer-R: CCAACAAGTCGCTCACCATCT    |
| CPNE1              | Primer-F: CACTGCGTGACCTTGGTTCA     |
|                    | Primer-R: CTCCCACATCCTGTAAAAGGAC   |
| SYPL1              | Primer-F: AAGATTACGTCCTCATAGGCGA   |
|                    | Primer-R: TCGTGTAGCCAACATAAAGCAG   |
| HAX1               | Primer-F: AGCATCTTCAGCGATATGGGG    |
|                    | Primer-R: CCTCCCGTAGTCTCTCACCA     |
| HMGB1              | Primer-F: TATGGCAAAGCGGACAAGG      |
|                    | Primer-R: CTTGCAACATCACCAATGGA     |
| SMAD3              | Primer-F: TGGACGCAGTTCTCCAAAC      |
|                    | Primer-R: CCGGCTCGCAGTAGGTAAC      |
| ZEB1               | Primer-F: GATGATGAATGCGAGTCAGATGC  |
|                    | Primer-R: ACAGCAGTGTCTTGTTGTTGT    |
| ZEB1-P1(ChIP-qPCR) | Primer-F: TGGTGGGGTGGGGTCAATTCC    |
|                    | Primer-R: ACGGTGTCCTTGCTTTGCTTGG   |
| ZEB1-P2(ChIP-qPCR) | Primer-F: ACTCCGGTCACGTTTCAGTTT    |
|                    | Primer-R: TGCTTCCCACCTCCTTCGAA     |

|                             |                                     |
|-----------------------------|-------------------------------------|
| ZEB1-P3(ChIP-qPCR)          | Primer-F: CTGGAAGGGAAGGGAAGGGAGTC   |
|                             | Primer-R: TGAGGGGAAGGGCAGGTTTGG     |
| ZEB1-P4(ChIP-qPCR)          | Primer-F: TCCCTCGCCCCTCAATTCAAATTC  |
|                             | Primer-R: CCGCACCTGGTTTACGACACTC    |
| LINC01977-P1<br>(ChIP-qPCR) | Primer-F: TCCAAGGCGTCAAGGGCAATTC    |
|                             | Primer-R: CAGGTGGTTCTCATGGACAAGGC   |
| LINC01977-P2(ChIP-qPCR)     | Primer-F: GAGAGGAGAGTGGAGCCGTCAG    |
|                             | Primer-R: ACCGTAAAGGAGTAGGGATGGATCG |
| LINC01977-P3<br>(ChIP-qPCR) | Primer-F: TCCTGCTTAGGTGGGAGGTTGAC   |
|                             | Primer-R: TGGGCCATACATCCATTTGGTTCC  |
| E1 (ChIP-qPCR)              | Primer-F: CCTGCCACAGGATGTTGAGAAGTG  |
|                             | Primer-R: AAACCCACCCTCGTGATAATGAACC |
| E2 (ChIP-qPCR)              | Primer-F: CTCCATTCTCAAGCGAGGACACTG  |
|                             | Primer-R: GCCACACAGGTCAGATCACAGAAC  |
| E3 (ChIP-qPCR)              | Primer-F: GTGCAGGAAGGTGGGAATGGAATG  |
|                             | Primer-R: GCCCTACCCTGTCATACCCTCTC   |
| E4 (ChIP-qPCR)              | Primer-F: CCATACCGAAGAACCGAAGAGCAG  |
|                             | Primer-R: GGCAGATGTTCCCCAGGCATTG    |
| E5 (ChIP-qPCR)              | Primer-F: GTGCAGGAAGGTGGGAATGGAATG  |
|                             | Primer-R: GCCCTACCCTGTCATACCCTCTC   |
| E6 (ChIP-qPCR)              | Primer-F: TTCTTCCTGCCTGTAAAAGCCTCAC |
|                             | Primer-R: GGTGGGACTCGGGAACAAAAGTG   |
| CREBBP(Crispr/Cas9)<br>sg#1 | Primer-F: GACGACGTCTGGCTCATGTT      |
|                             | Primer-R: AGGTACCACAGGCAGAGAGG      |
| CREBBP(Crispr/Cas9)<br>sg#2 | Primer-F: CAACAGCAGATGAAGCAGCA      |
|                             | Primer-R: AGGGACAGTTCGCTGGACAG      |
| CREBBP(Crispr/Cas9)<br>sg#3 | Primer-F: ATTACAAGCGTGAGCCACCG      |
|                             | Primer-R: CACCAATGTAGCTAATCAAG      |
| EP300(Crispr/Cas9)<br>sg#1  | Primer-F: TTAACAGGCACAAATGTCTA      |
|                             | Primer-R: CTGCTGTGCTCTGCTGTGAG      |
| EP300(Crispr/Cas9)<br>sg#2  | Primer-F: CTCCTGTCTTTGGCTTTTCT      |
|                             | Primer-R: CCCTAAGTCCAAAATTGTTA      |
| EP300(Crispr/Cas9)<br>sg#3  | Primer-F: AGCCTGGATGACAGAGCGAG      |
|                             | Primer-R: CAGGCCTCTATAAAATACGT      |
| SMAD3(Crispr/Cas9)<br>sg#1  | Primer-F: CAGTCACTGGGAGCAGCTCT      |
|                             | Primer-R: ATCCAATCACCTCCAGATTG      |
| SMAD3(Crispr/Cas9)<br>sg#2  | Primer-F: TCACTGGGAGCAGCTCTGCT      |
|                             | Primer-R: AACCTAATCCAATCACCTCC      |
| SAM3(Crispr/Cas9)<br>sg#3   | Primer-F: AGTCACTGGGAGCAGCTCTG      |
|                             | Primer-R: TAATCCAATCACCTCCAGAT      |

**Supplementary Table 9. Antibodies, reagents and kits used in this study**

| <b>Antibodies</b>                      | <b>Source</b>             | <b>Identifier</b>            | <b>Application</b>                           |
|----------------------------------------|---------------------------|------------------------------|----------------------------------------------|
| anti-Acetyl-Histone H3 (Lys27) (D5E4)  | Cell Signaling Technology | Cat#8173S, RRID: AB_10949503 | IF(1:200), ChIP(1:50)                        |
| anti-CBP (D6C5)                        | Cell Signaling Technology | Cat#7389S, RRID: AB_2616020  | IP(1:200), ChIP(1:100) WB(1:1000)            |
| anti-CD3                               | Biolegend                 | Cat#317318, RRID: AB_1937212 | Cell sorting                                 |
| anti-CD4                               | Biolegend                 | Cat#317416, RRID: AB_571945  | Cell sorting                                 |
| anti-CD8                               | Biolegend                 | Cat#344722, RRID: AB_2075388 | Cell sorting                                 |
| anti-CD206 (E6T5J)                     | Cell Signaling Technology | Cat#24595S, RRID: AB_2892682 | IF(1:150)                                    |
| anti-CD68 (D4B9C)                      | Cell Signaling Technology | Cat#76437S, RRID: AB_2799882 | IF(1:200)                                    |
| anti-CBP                               | Abcam                     | Cat#ab2832, RRID: AB_303342  | IHC(1:200)                                   |
| anti-GAPDH (14C10)                     | Cell Signaling Technology | Cat#2118S, RRID: AB_561053   | WB(1:1000)                                   |
| anti-HA-tag (C29F4)                    | Cell Signaling Technology | Cat#3724T, RRID: AB_1549585  | WB(1:1000)                                   |
| anti-Histone H3 (D1H2)                 | Cell Signaling Technology | Cat#4499T, RRID: AB_10544537 | WB(1:1000)                                   |
| anti-P300 (D2X6N)                      | Cell Signaling Technology | Cat#54062S, RRID: AB_2799450 | ChIP(1:100), IP(1:150) WB(1:1000)            |
| anti-Phospho-SMAD2 (Ser465/467)(E8F3R) | Cell Signaling Technology | Cat#18338T, RRID: AB_2798798 | WB(1:1000)                                   |
| anti-Phospho-SMAD3 (Ser423/425)(C25A9) | Cell Signaling Technology | Cat#9520S, RRID: AB_2193207  | WB(1:1000), IHC(1:150), IF(1:150), IP(1:200) |
| anti-SMAD2 (D43B4)                     | Cell Signaling Technology | Cat#5339S, RRID: AB_10626777 | WB(1:1000)                                   |

|                                       |                           |                                  |                             |
|---------------------------------------|---------------------------|----------------------------------|-----------------------------|
| anti-SMAD2/3 (D7G7)                   | Cell Signaling Technology | Cat#8685S, RRID: AB_10889933     | WB(1:1000)                  |
| anti-SMAD3(phospho S423+425) (EP823Y) | Abcam                     | Cat#ab52903, RRID: AB_882596     | IHC(1:200), IP(1:150)       |
| anti-SMAD3(C67H3)                     | Cell Signaling Technology | Cat#9523S, RRID: AB_2193182      | WB(1:800), ChIP(1:100)      |
| anti-SMAD4 (D3R4N)                    | Cell Signaling Technology | Cat#46535S, RRID: AB_2736998     | WB(1:1000), IP(1:150)       |
| anti-ZEB1                             | Proteintech               | Cat#21544-1-AP, RRID:AB_10734325 | WB(1:800), IHC(1:400)       |
| anti-β-Actin (8H10D10)                | Cell Signaling Technology | Cat#3700S, RRID: AB_2242334      | WB(1:1000)                  |
| anti-FLAG-Tag                         | Thermo Fisher             | Cat#MA1-91878, RRID: AB_1957945  | WB(1:1000)                  |
| anti-cyclinD1                         | Abcam                     | Cat#ab134175, RRID: AB_2750906   | WB(1:1000)                  |
| anti-cyclinE1                         | Abcam                     | Cat#ab33911, RRID:AB_731787      | WB(1:1000)                  |
| anti-E-cadherin                       | Cell Signaling Technology | Cat#14472S, RRID:AB_2728770      | WB(1:1000) IHC(1:400)       |
| anti-N-cadherin                       | Cell Signaling Technology | Cat#13116S, RRID:AB_2687616      | WB(1:1000)                  |
| anti-SNAIL                            | Cell Signaling Technology | Cat#3895S, RRID:AB_2191759       | WB(1:1000)                  |
| anti-cleaved Caspase3                 | Cell Signaling Technology | Cat#9664S, RRID:AB_2070042       | IHC(1:300)                  |
| anti-Ki-67                            | Cell Signaling Technology | Cat#2586S, RRID:AB_2160343       | IHC(1:300)                  |
| anti-PCNA                             | Cell Signaling Technology | Cat#13110S, RRID:AB_1083636      | IHC(1:300)                  |
| <b>Reagents</b>                       | <b>Source</b>             | <b>Identifier</b>                | <b>Application</b>          |
| SGC-CBP30                             | ApexBio                   | Cat#A4491                        | in vitro and in vivo assays |

|                                                    |                           |                   |                                 |
|----------------------------------------------------|---------------------------|-------------------|---------------------------------|
| JQ1                                                | ApexBio                   | Cat#A1910         | in vitro assays                 |
| SB431542                                           | ApexBio                   | Cat#A8249         | in vitro assays                 |
| SIS3                                               | ApexBio                   | Cat#B6096         | in vitro assays                 |
| TGF- $\beta$                                       | ApexBio                   | Cat#P1039         | in vitro assays                 |
| Lipofectamine 3000                                 | Invitrogen                | Cat#L3000-075     | DNA and lncRNA-ASO transfection |
| Lipofectamine CRISPRMAX                            | Invitrogen                | Cat#CMAX00008     | Crispr/Cas9 system              |
| DMSO                                               | Solarbio                  | Cat#D8371         | <i>in vitro</i> assays          |
| TRIzol                                             | Invitrogen                | Cat#15596018      | RNA extraction                  |
| Mayer's hematoxylin solution                       | Solarbio                  | Cat#G1080         | RNAScope and IHC assay          |
| PowerUp <sup>TM</sup> SYBR Green Master Mix        | Thermo Fisher             | Cat#00775499      | qRT-PCR                         |
| Pierce IP lysis buffer                             | Thermo Fisher             | Cat#87788         | RNA pull-down assay             |
| Cremophor                                          | Selleck Chemicals         | Cat#S6828         | <i>In vivo</i> assays           |
| Cas9 protein                                       | Thermo Fisher             | Cat#A50577        | Crispr/Cas9 system              |
| Ambion RNase cocktail                              | Thermo Fisher             | Cat#AM2286        | Dependency assay with co-IP     |
| Phanta Max Master Mix (Dye Plus)                   | Vazyme                    | CatP525-02        | High fidelity PCR amplification |
| <b>Kits</b>                                        | <b>Source</b>             | <b>Identifier</b> | <b>Application</b>              |
| RNAScope 2.5 High Definition Red Reagent Assay Kit | Advanced Cell Diagnostics | Cat#322350        | RNAScope assay                  |
| EZ-Magna RIP Kit                                   | Merck Millipore           | Cat#17-701        | RIP assay                       |
| EZ-Magna Nuclear RIP Kit (Native)                  | Merck Millipore           | Cat#17-10523      | RIP assay                       |
| EdU DNA Proliferation Kit                          | KeyGene                   | Cat#KGA331-100    | EdU assay                       |
| RNeasy FFPE Kit                                    | Qiagen                    | Cat#73504         | RNA extraction from FFPE        |
| Primer Script RT reagent Kit                       | Takara                    | Cat#RR036A        | qRT-PCR                         |
| Dual-Luciferase Assay Kit                          | Promega                   | Cat#E1910         | Dual-luciferase reporter assays |
| RNAmix-T7 transcription Kit                        | RiboBio                   | Cat#C11001-2      | In vitro RNA transcription      |
| Pierce RNA 3' End                                  | Thermo                    | Cat#20163         | Biotin-lable RNA                |

|                                           |                |                   |                                            |
|-------------------------------------------|----------------|-------------------|--------------------------------------------|
| Desthiobiotinylation Kit                  | Fisher         |                   | probes for RNA pull-down assay             |
| Pierce Magnetic RNA-Protein Pull-Down Kit | Thermo Fisher  | Cat#20164         | RNA Pull-down                              |
| ChIP-IT Express Kit                       | Active Motif   | Cat#53008         | ChIP assays                                |
| PARIS protein and RNA isolation Kit       | Invitrogen     | Cat#AM1921        | Subcellular fractions isolation            |
| PCR Array (Human-EMT)                     | Wcgene Biotech | Cat#WC-MRNA0053-H | qRT-PCR detection for EMT associated genes |
| Human TGF-beta1 ELISA Kit                 | FCMACS Biotech | Cat#FMS-ELH038    | ELISA detection for TGF-beta1              |
| Genomic DNA extraction kit                | TIANGEN        | Cat#DP304         | DNA extraction                             |
| Pierce Co-Immunoprecipitation Kit         | Thermo Fisher  | Cat#26149         | co-IP assays                               |
